## RESEARCH ARTICLE

# Many but not all deep neural network audio models capture brain responses and exhibit correspondence between model stages and brain regions

Greta Tuckute<sup>1,2‡\*</sup>, Jenelle Feather<sup>1,2‡\*</sup>, Dana Boebinger<sup>1,2,3,4</sup>, Josh H. McDermott<sup>1,2,3\*</sup>

**1** Department of Brain and Cognitive Sciences, McGovern Institute for Brain Research MIT, Cambridge, Massachusetts, United States of America, **2** Center for Brains, Minds, and Machines, MIT, Cambridge, Massachusetts, United States of America, **3** Program in Speech and Hearing Biosciences and Technology, Harvard, Cambridge, Massachusetts, United States of America, **4** University of Rochester Medical Center, Rochester, New York, New York, United States of America

‡ These authors share first authorship on this work.

\* [gretatu@mit.edu](mailto:gretatu@mit.edu) (GT); [jfeather@mit.edu](mailto:jfeather@mit.edu) (JF); [jhm@mit.edu](mailto:jhm@mit.edu) (JHM)

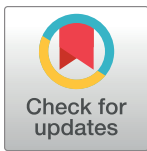

## OPEN ACCESS

**Citation:** Tuckute G, Feather J, Boebinger D, McDermott JH (2023) Many but not all deep neural network audio models capture brain responses and exhibit correspondence between model stages and brain regions. *PLoS Biol* 21(12): e3002366. <https://doi.org/10.1371/journal.pbio.3002366>

**Academic Editor:** David Poeppel, New York University, UNITED STATES

**Received:** November 3, 2022

**Accepted:** October 6, 2023

**Published:** December 13, 2023

**Copyright:** © 2023 Tuckute et al. This is an open access article distributed under the terms of the [Creative Commons Attribution License](https://creativecommons.org/licenses/by/4.0/), which permits unrestricted use, distribution, and reproduction in any medium, provided the original author and source are credited.

**Data Availability Statement:** The code is available from GitHub repo: [https://github.com/gretatuckute/auditory\\_brain\\_dnn/](https://github.com/gretatuckute/auditory_brain_dnn/). An archived version is found at <https://zenodo.org/record/8349726> (DOI.org/10.5281/zenodo.8349726). The repository contains a download script allowing the user to download the neural and component data, model activations, result outputs, and fMRI maps.

**Funding:** This work was supported by the National Institutes of Health (grant R01 DC017970 to JHM, including partial salary support for JHM and JF), an

## Abstract

Models that predict brain responses to stimuli provide one measure of understanding of a sensory system and have many potential applications in science and engineering. Deep artificial neural networks have emerged as the leading such predictive models of the visual system but are less explored in audition. Prior work provided examples of audio-trained neural networks that produced good predictions of auditory cortical fMRI responses and exhibited correspondence between model stages and brain regions, but left it unclear whether these results generalize to other neural network models and, thus, how to further improve models in this domain. We evaluated model-brain correspondence for publicly available audio neural network models along with in-house models trained on 4 different tasks. Most tested models outperformed standard spectrotemporal filter-bank models of auditory cortex and exhibited systematic model-brain correspondence: Middle stages best predicted primary auditory cortex, while deep stages best predicted non-primary cortex. However, some state-of-the-art models produced substantially worse brain predictions. Models trained to recognize speech in background noise produced better brain predictions than models trained to recognize speech in quiet, potentially because hearing in noise imposes constraints on biological auditory representations. The training task influenced the prediction quality for specific cortical tuning properties, with best overall predictions resulting from models trained on multiple tasks. The results generally support the promise of deep neural networks as models of audition, though they also indicate that current models do not explain auditory cortical responses in their entirety.

MIT Broshy Fellowship (to GT), an Amazon Science Hub Fellowship (to GT), the American Association of University Women (an International Doctoral Fellowship to GT), the US Department of Energy (Computational Science Graduate Fellowship under grant no. DE-FG02-97ER25308 to JF), and a Friends of the McGovern Institute Fellowship to JF. Each of the fellowships provided partial salary support to the recipient. The funders had no role in study design, data collection and analysis, decision to publish, or preparation of the manuscript.

**Competing interests:** The authors have declared that no competing interests exist.

**Abbreviations:** AST, Audio Spectrogram Transformer; BLSTM, bidirectional long short-term memory; BOLD, blood-oxygen-level-dependent; DNN, deep neural network; ED, effective dimensionality; ERB, Equivalent Rectangular Bandwidth; fMRI, functional magnetic resonance imaging; HRF, hemodynamic response function; GAN, generative adversarial network; LSTM, long short-term memory; PSC, percent signal change; RDM, representational dissimilarity matrix; RMS, root mean square; ROI, region of interest; RSA, representational similarity analysis; SNR, signal-to-noise ratio; SVM, support vector machine; SWC, Spoken Wikipedia Corpora; S2T, Speech-to-Text; TE, echo time; TR, repetition time; VQ-VAE, vector-quantized variational autoencoder; WSJ, Wall Street Journal.

## Introduction

An overarching aim of neuroscience is to build quantitatively accurate computational models of sensory systems. Success entails models that take sensory signals as input and reproduce the behavioral judgments mediated by a sensory system as well as its internal representations. A model that can replicate behavior and brain responses for arbitrary stimuli would help validate the theories that underlie the model but would also have a host of important applications. For instance, such models could guide brain-machine interfaces by specifying patterns of brain stimulation needed to elicit particular percepts or behavioral responses.

One approach to model building is to construct machine systems that solve biologically relevant tasks, based on the hypothesis that task constraints may cause them to reproduce the characteristics of biological systems [1,2]. Advances in machine learning have stimulated a wave of renewed interest in this model building approach. Specifically, deep artificial neural networks now achieve human-level performance on real-world classification tasks such as object and speech recognition, yielding a new generation of candidate models in vision, audition, language, and other domains [3–8]. Deep neural network (DNN) models are relatively well explored within vision, where they reproduce some patterns of human behavior [9–12] and in many cases appear to replicate aspects of the hierarchical organization of the primate ventral stream [13–16]. These and other findings are consistent with the idea that brain representations are constrained by the demands of the tasks organisms must carry out, such that optimizing for ecologically relevant tasks produces better models of the brain in a variety of respects.

These modeling successes have been accompanied by striking examples of model behaviors that deviate from those of humans. For instance, current neural network models are often vulnerable to adversarial perturbations—targeted changes to the input that are imperceptible to humans, but which change the classification decisions of a model [17–20]. Current models also often do not generalize to stimulus manipulations to which human recognition is robust, such as additive noise or translations of the input [12,21–24]. Models also typically exhibit invariances that humans lack, such that model metamers—stimuli that produce very similar responses in a model—are typically not recognizable as the same object class to humans [25–27]. And efforts to compare models to classical perceptual effects exhibit a mixture of successes and failures, with some human perceptual phenomena missing from the models [28,29]. The causes and significance of these model failures remain an active area of investigation and debate [30].

Alongside the wave of interest within human vision, DNN models have also stimulated research in audition. Comparisons of human and model behavioral characteristics have found that audio-trained neural networks often reproduce patterns of human behavior when optimized for naturalistic tasks and stimulus sets [31–35]. Several studies have also compared audio-trained neural networks to brain responses within the auditory system [31,36–44]. The best known of these prior studies is arguably that of Kell and colleagues [31], who found that DNNs jointly optimized for speech and music classification could predict functional magnetic resonance imaging (fMRI) responses to natural sounds in auditory cortex substantially better than a standard model based on spectrotemporal filters. In addition, model stages exhibited correspondence with brain regions, with middle stages best predicting primary auditory cortex and deeper stages best predicting non-primary auditory cortex. However, Kell and colleagues [31] used only a fixed set of 2 tasks, investigated a single class of model, and relied exclusively on regression-derived predictions as the metric of model-brain similarity.

Several subsequent studies built on these findings by analyzing models trained on various speech-related tasks and found that they were able to predict cortical responses to speech better than chance, with some evidence that different model stages best predicted different brain

regions [40–43]. Another recent study examined models trained on sound recognition tasks, finding better predictions of brain responses and perceptual dissimilarity ratings when compared to traditional acoustic models [44]. But each of these studies analyzed only a small number of models, and each used a different brain dataset, making it difficult to compare results across studies, and leaving the generality of brain-DNN similarities unclear. Specifically, it has remained unclear whether DNNs trained on other tasks and sounds also produce good predictions of brain responses, whether the correspondence between model stages and brain regions is consistent across models, and whether the training task critically influences the ability to predict responses in particular parts of auditory cortex. These questions are important for substantiating the hierarchical organization of the auditory cortex (by testing whether distinct stages of computational models best map onto different regions of the auditory system), for understanding the role of tasks in shaping cortical representations (by testing whether optimization for particular tasks produces representations that match those of the brain), and for guiding the development of better models of the auditory system (by helping to understand the factors that enable a model to predict brain responses).

To answer these questions, we examined brain-DNN similarities within the auditory cortex for a large set of models. To address the generality of brain-DNN similarities, we tested a large set of publicly available audio-trained neural network models, trained on a wide variety of tasks and spanning many types of models. To address the effect of training task, we supplemented these publicly available models with in-house models trained on 4 different tasks. We evaluated both the overall quality of the brain predictions as compared to a standard baseline spectrotemporal filter model of the auditory cortex [45], as well as the correspondence between model stages and brain regions. To ensure that the general conclusions were robust to the choice of model-brain similarity metric, wherever possible, we used 2 different metrics: the variance explained by linear mappings fit from model features to brain responses [46], and representational similarity analysis [47] (noting that these 2 metrics evaluate distinct inferences about what might be similar between 2 representations [48,49]). We used 2 different fMRI datasets to assess the reproducibility and robustness of the results: the original dataset ([50];  $n = 8$ ) used in Kell and colleagues' article [31], to facilitate comparisons to those earlier results, as well as a second recent dataset ([51];  $n = 20$ ) with data from a total of 28 unique participants. We analyzed auditory cortical brain responses, as subcortical responses are challenging to measure with the necessary reliability (and hence were not included in the datasets we analyzed).

We found that most DNN models produced better predictions of brain responses than the baseline model of the auditory cortex. In addition, most models exhibited a correspondence between model stages and brain regions, with lateral, anterior, and posterior non-primary auditory cortex being better predicted by deeper model stages. Both of these findings indicate that many such models provide better descriptions of cortical responses than traditional filter-bank models of auditory cortex. However, not all models produced good predictions, suggesting that some training tasks and architectures yield better brain predictions than others. We observed effects of the training data, with models trained to hear in noise producing better brain predictions than those trained exclusively in quiet. We also observed significant effects of the training task on the predictions of speech, music, and pitch-related cortical responses. The best overall predictions were produced by models trained on multiple tasks. The results replicated across both fMRI datasets and with representational similarity analysis. The results indicate that many DNNs replicate aspects of auditory cortical representations but indicate the important role of training data and tasks in obtaining models that yield accurate brain predictions, in turn consistent with the idea that auditory cortical tuning has been shaped by the demands of having to support auditory behavior.

## Results

### Deep neural network modeling overview

The artificial neural network models considered here take an audio signal as input and transform it via cascades of operations loosely inspired by biology: filtering, pooling, and normalization, among others. Each stage of operations produces a representation of the audio input, typically culminating in an output stage: a set of units whose activations can be interpreted as the probability that the input belongs to a particular class (for instance, a spoken word, or phoneme, or sound category).

A model is defined by its “architecture”—the arrangement of operations within the model—and by the parameters of each operation that may be learned during training. These parameters are typically initialized randomly and are then optimized via gradient descent to minimize a loss function over a set of training data. The loss function is typically designed to quantify performance of a task. For instance, training data might consist of a set of speech recordings that have been annotated, the model’s output units might correspond to word labels, and the loss function might quantify the accuracy of the model’s word labeling compared to the annotations. The optimization that occurs during training would cause the model’s word labeling to become progressively more accurate.

A model’s performance is a function of both the architecture and the training procedure; training is thus typically conducted alongside a search over the space of model architectures to find an architecture that performs the training task well. Once trained, a model can be applied to any arbitrary stimulus, yielding a decision (if trained to classify its input) that can be compared to the decisions of human observers, along with internal model responses that can be compared to brain responses. Here, we focus on the internal model responses, comparing them to fMRI responses in human auditory cortex, with the goal of assessing whether the representations derived from the model reproduce aspects of representations in the auditory cortex as evaluated by 2 commonly used metrics.

### Model selection

We began by compiling a set of models that we could compare to brain data (see “Candidate models” in Methods for full details and Tables 1 and 2 for an overview). Two criteria dictated

**Table 1. External model overview.**

| Model name                                | Brief description                                                                                     | Model input | Model output                    | Training dataset                         |
|-------------------------------------------|-------------------------------------------------------------------------------------------------------|-------------|---------------------------------|------------------------------------------|
| AST (Audio Spectrogram Transformer) [142] | Transformer architecture for audio classification.                                                    | Spectrogram | AudioSet label (527)            | AudioSet (ImageNet pretraining) [55,124] |
| DCASE2020 [143]                           | Recurrent network trained for automated audio captioning.                                             | Spectrogram | Audio text captions (4,367)     | Clotho V1 [144]                          |
| DeepSpeech2 [145]                         | Recurrent architecture for automatic speech recognition.                                              | Spectrogram | Characters (29)                 | LibriSpeech [146]                        |
| MetricGAN [147]                           | Generative adversarial network for speech enhancement.                                                | Spectrogram | Voice-enhanced audio            | VoiceBank-DEMAND [148]                   |
| S2T (Speech-to-Text) [149]                | Transformer architecture for automatic speech recognition and speech-to-text translation.             | Spectrogram | Words (10,000)                  | LibriSpeech [146]                        |
| SepFormer (Separation Transformer) [150]  | Transformer architecture for speech separation.                                                       | Waveform    | Source-separated audio          | WHAMR! [151]                             |
| VGGish [152]                              | Convolutional architecture for audio classification.                                                  | Spectrogram | Video label (30,871)            | YouTube-100M [152]                       |
| VQ-VAE (ZeroSpeech2020) [153]             | Autoencoder architecture for sound reconstruction (generation of speech in a target speaker’s voice). | Spectrogram | Audio in target speaker’s voice | ZeroSpeech 2019 training dataset [154]   |
| Wav2Vec2 [129]                            | Transformer architecture for automatic speech recognition.                                            | Waveform    | Characters (32)                 | LibriSpeech [146]                        |

<https://doi.org/10.1371/journal.pbio.3002366.t001>

**Table 2. In-house model overview.**

| Model name             | Brief description                                                                                               | Model input | Model output                                                                     | Training dataset                            |
|------------------------|-----------------------------------------------------------------------------------------------------------------|-------------|----------------------------------------------------------------------------------|---------------------------------------------|
| CochCNN9 Word          | Convolutional architecture for word recognition                                                                 | Cochleagram | Word label (794)                                                                 | Word-Speaker-Noise dataset [25]             |
| CochCNN9 Speaker       | Convolutional architecture for speaker recognition                                                              | Cochleagram | Speaker label (433)                                                              | Word-Speaker-Noise dataset [25]             |
| CochCNN9 AudioSet      | Convolutional architecture for auditory event recognition (AudioSet)                                            | Cochleagram | AudioSet label (517)                                                             | Word-Speaker-Noise dataset [25]             |
| CochCNN9 MultiTask     | Convolutional architecture for word recognition, speaker recognition, and auditory event recognition (AudioSet) | Cochleagram | Three output layers: Word label (794), Speaker label (433), AudioSet label (517) | Word-Speaker-Noise dataset [25]             |
| CochCNN9 Genre         | Convolutional architecture for music genre classification                                                       | Cochleagram | Genre label (41)                                                                 | Genre task using Million Song Dataset [155] |
| CochResNet50 Word      | Convolutional architecture for word recognition                                                                 | Cochleagram | Word label (794)                                                                 | Word-Speaker-Noise dataset [25]             |
| CochResNet50 Speaker   | Convolutional architecture for speaker recognition                                                              | Cochleagram | Speaker label (433)                                                              | Word-Speaker-Noise dataset [25]             |
| CochResNet50 AudioSet  | Convolutional architecture for auditory event recognition (AudioSet)                                            | Cochleagram | AudioSet label (517)                                                             | Word-Speaker-Noise dataset [25]             |
| CochResNet50 MultiTask | Convolutional architecture for word recognition, speaker recognition, and auditory event recognition (AudioSet) | Cochleagram | Three output layers: Word label (794), Speaker label (433), AudioSet label (517) | Word-Speaker-Noise dataset [25]             |
| CochResNet50 Genre     | Convolutional architecture for music genre classification                                                       | Cochleagram | Genre label (41)                                                                 | Genre task using Million Song Dataset [155] |
| SpectroTemporal        | Linear filterbank with spectral and temporal modulations [45]                                                   | Cochleagram | Spectrotemporal embedding space                                                  | (None)                                      |

<https://doi.org/10.1371/journal.pbio.3002366.t002>

the choice of models. First, we sought to survey a wide range of models to assess the generality with which DNNs would be able to model auditory cortical responses. Second, we wanted to explore effects of the training task. The main constraint on the model set was that there were relatively few publicly available audio-trained DNN models available at the time of this study (in part because much work on audio engineering is done in industry settings where models and datasets are not made public). We thus included every model for which we could obtain a PyTorch implementation that had been trained on some sort of large-scale audio task (i.e., we neglected models trained to classify spoken digits, or other tasks with small numbers of classes, on the grounds that such tasks are unlikely to place strong constraints on the model representations [52,53]). The PyTorch constraint resulted in the exclusion of 3 models that were otherwise available at the time of the experiments (see [Methods](#)). The resulting set of 9 models varied in both their architecture (spanning convolutional neural networks, recurrent neural networks, and transformers) and training task (ranging from automatic speech recognition and speech enhancement to audio captioning and audio source separation).

To supplement these external models, we trained 10 models ourselves: 2 architectures trained separately on each of 4 tasks as well as on 3 of the tasks simultaneously. We used the 3 tasks that could be implemented using the same dataset (where each sound clip had labels for words, speakers, and audio events). One of the architectures we used was similar to that used in our earlier study [31], which identified a candidate architecture from a large search over number of stages, location of pooling, and size of convolutional filters. The model was selected entirely based on performance on the training tasks (i.e., word and music genre recognition). The resulting model performed well on both word and music genre recognition and was more predictive of brain responses to natural sounds than a set of alternative neural network

architectures as well as a baseline model of auditory cortex. This in-house architecture (henceforth CochCNN9) consisted of a sequence of convolutional, normalization, and pooling stages preceded by a hand-designed model of the cochlea (henceforth termed a “cochleagram”). The second in-house architecture was a ResNet50 [54] backbone with a cochleagram front end (henceforth CochResNet50). CochResNet50 was a much deeper model than CochCNN9 (50 layers compared to 9 layers) with residual (skip layer) connections, and although this architecture was not determined via an explicit architecture search for auditory tasks, it was developed for computer vision tasks [54] and outperformed CochCNN9 on the training tasks (see [Methods](#); Candidate models). We used 2 architectures to obtain a sense of the consistency of any effects of task that we might observe.

The 4 in-house training tasks consisted of recognizing words, speakers, audio events (labeled clips from the AudioSet [55] dataset, consisting of human and animal sounds, excerpts of various musical instruments and genres, and environmental sounds), or musical genres from audio (referred to henceforth as Word, Speaker, AudioSet, and Genre, respectively). The multitask models had 3 different output layers, one for each included task (Word, Speaker, and AudioSet), connected to the same network. The 3 tasks for the multitask network were originally chosen because we could train on all of them simultaneously using a single existing dataset (the Word-Speaker-Noise dataset [25]) in which each clip has 3 associated labels: a word, a speaker, and a background sound (from AudioSet). For the single-task networks, we used one of these 3 sets of labels. We additionally trained models with a fourth task—a music-genre classification task originally presented by Kell and colleagues [31] that used a distinct training set. As it turned out, the first 3 tasks individually produced better brain predictions than the fourth, and the multitask model produced better predictions than any of the models individually, and so we did not explore additional combinations of tasks. These in-house models were intended to allow a controlled analysis of the effect of task, to complement the all-inclusive but uncontrolled set of external models.

We compared each of these models to an untrained baseline model that is commonly used in cognitive neuroscience [45]. The baseline model consisted of a set of spectrotemporal modulation filters applied to a model of the cochlea (henceforth referred to as the SpectroTemporal model). The SpectroTemporal baseline model was explicitly constructed to capture tuning properties observed in the auditory cortex and previously been found to account for auditory cortical responses to some extent [56], particularly in primary auditory cortex [57], and thus provided a strong baseline for model comparison.

## Brain data

To assess the replicability and robustness of the results, we evaluated the models on 2 independent fMRI datasets (each with 3 scanning sessions per participant). Each presented the same set of 165 two-second natural sounds to human listeners. One experiment [50] collected data from 8 participants with moderate amounts of musical experience (henceforth NH2015). This dataset was analyzed in a previous study investigating DNN predictions of fMRI responses [31]. The second experiment [51] collected data from a different set of 20 participants, 10 of whom had almost no formal musical experience, and 10 of whom had extensive musical training (henceforth B2021). The fMRI experiments measured the blood-oxygen-level-dependent (BOLD) response to each sound in each voxel in the auditory cortex of each participant (including all temporal lobe voxels that responded significantly more to sound than silence, and whose test-retest response reliability exceeded a criterion; see [Methods](#); fMRI data). We note that the natural sounds used in the fMRI experiment, with which we evaluated model-

brain correspondence, were not part of the training data for the models, nor were they drawn from the same distribution as the training data.

## General approach to analysis

Because the sounds were short relative to the time constant of the fMRI BOLD signal, we summarized the fMRI response from each voxel as a single scalar value for each sound. The primary similarity metric we used was the variance in these voxel responses that could be explained by linear mappings from the model responses, obtained via regression. This regression analysis has the advantage of being in widespread use [31,46,56,58,59,60] and hence facilitates comparison of results to related work. We supplemented the regression analysis with a representational similarity analysis [47] and wherever possible present results from both metrics.

The steps involved in the regression analysis are shown in Fig 1A. Each sound was passed through a neural network model, and the unit activations from each network stage were used to predict the response of individual voxels (after averaging unit activations over time to mimic the slow time constant of the BOLD signal). Predictions were generated with cross-validated ridge regression, using methods similar to those of many previous studies using encoding models of fMRI measurements [31,46,56,58,59,60]. Regression yields a linear mapping that rotates and scales the model responses to best align them to the brain response, as is needed to compare responses in 2 different systems (model and brain, or 2 different brains or models). A model that reproduces brain-like representations should yield similar patterns of response variation across stimuli once such a linear transform has been applied (thus “explaining” a large amount of the brain response variation across stimuli).

The specific approach here was modeled after that of Kell and colleagues [31]: We used 83 of the sounds to fit the linear mapping from model units to a voxel’s response and then evaluated the predictions on the 82 remaining sounds, taking the median across 10 training-/test cross-validation splits and correcting for both the reliability of the measured voxel response and the reliability of the predicted voxel response [61,62]. The variance explained by a model stage was taken as a metric of the brain-likeness of the model representations. We asked (i) to what extent the models in our set were able to predict brain data, and (ii) whether there was a relationship between stages in a model and regions in the human brain. We performed the same analysis on the SpectroTemporal baseline model for comparison.

To assess the robustness of our overall conclusions to the evaluation metric, we also performed representational similarity analysis to compare the representational geometries between brain and model responses (Fig 1B). We first measured representational dissimilarity matrices (RDMs) for a set of voxel responses from the Pearson correlation of all the voxel responses to one sound with that for another sound. These correlations for all pairs of sounds yields a matrix, which is standardly expressed as  $1-C$ , where  $C$  is the correlation matrix. When computed from all voxels in the auditory cortex, this matrix is highly structured, with some pairs of sounds producing much more similar responses than others (S1 Fig). We then analogously measured this matrix from the time-averaged unit responses within a model stage. To assess whether the representational geometry captured by these matrices was similar between a model and the brain, we measured the Spearman correlation between the brain and model RDMs. As in previous work [63,64], we did not correct this metric for the reliability of the RDMs but instead computed a noise ceiling for it. We estimated the noise ceiling as the correlation between a held-out participant’s RDM and the average RDM of the remaining participants.

**A Regression Analysis (Voxelwise Modeling)**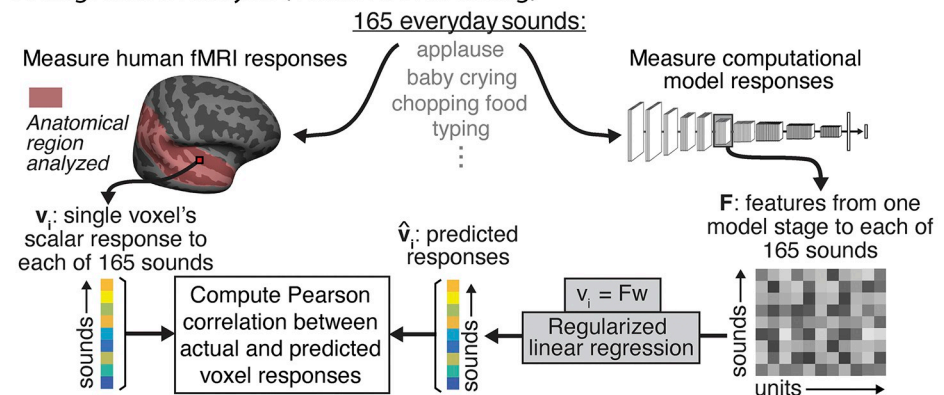**B Representational Similarity Analysis**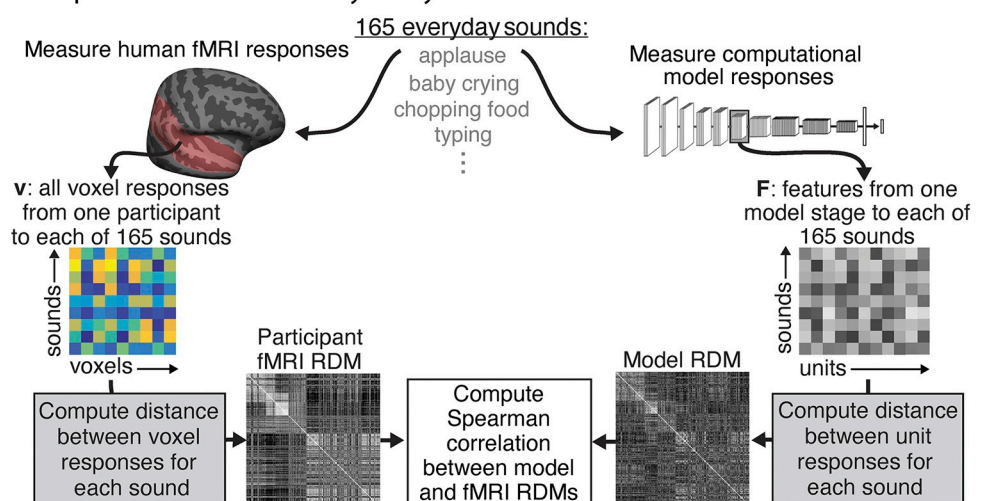

**Fig 1. Analysis method.** (A) Regression analysis (voxelwise modeling). Brain activity of human participants ( $n = 8$ ,  $n = 20$ ) was recorded with fMRI while they listened to a set of 165 natural sounds. Data were taken from 2 previous publications [50,51]. We then presented the same set of 165 sounds to each model, measuring the time-averaged unit activations from each model stage in response to each sound. We performed an encoding analysis where voxel activity was predicted by a regularized linear model of the DNN activity. We modeled each voxel as a linear combination of model units from a given model stage, estimating the linear transform with half ( $n = 83$ ) the sounds and measuring the prediction quality by correlating the empirical and predicted response to the left-out sounds ( $n = 82$ ) using the Pearson correlation. We performed this procedure for 10 random splits of the sounds. Figure adapted from Kell and colleagues' article [31]. (B) Representational similarity analysis. We used the set of brain data and model activations described for the voxelwise regression modeling. We constructed a representational dissimilarity matrix (RDM) from the fMRI responses by computing the distance ( $1 - \text{Pearson correlation}$ ) between all voxel responses to each pair of sounds. We similarly constructed an RDM from the unit responses from a model stage to each pair of sounds. We measured the Spearman correlation between the fMRI and model RDMs as the metric of model-brain similarity. When reporting this correlation from a best model stage, we used 10 random splits of sounds, choosing the best stage from the training set of 83 sounds and measuring the Spearman correlation for the remaining set of 82 test sounds. The fMRI RDM is the average RDM across all participants for all voxels and all sounds in NH2015. The model RDM is from an example model stage (ResNetBlock\_2 of the CochResNet50-MultiTask network).

<https://doi.org/10.1371/journal.pbio.3002366.g001>

The 2 metrics we employed are arguably the 2 most commonly used for model-brain comparison and measure distinct things. Regression reveals whether there are linear combinations of model features that can predict brain responses. A model could thus produce high explained variance even if it contained extraneous features that have no correspondence with the brain (because these will get low weight in the linear transform inferred by regression). By



comparison, RDMs are computed across all model features and hence could appear distinct from a brain RDM even if there is a subset of model features that captures the brain's representational space. Accurate regression-based predictions or similar representational geometries also do not necessarily imply that the underlying features are the same in the model and the brain, only that the model features are correlated with brain features across the stimulus set that is used [57,65] (typically natural sounds or images). Model-based stimulus generation can help address the latter issue [57] but ideally require a dedicated neuroscience experiment for each model, which in this context was prohibitive. Although the 2 metrics we used have limitations, an accurate model of the brain should replicate brain responses according to both metrics, making them a useful starting point for model evaluation. When describing the overall results of this study, we will describe both metrics as reflecting model "predictions"—regression provides predictions of voxel responses (or response components, as described below), whereas representational similarity analysis provides a prediction of the RDM.

### Many DNN models outperform traditional models of the auditory cortex

We first assessed the overall accuracy of the brain predictions for each model using regularized regression, aggregating across all voxels in the auditory cortex. For each DNN model, explained variance was measured for each voxel using the single best-predicting stage for that voxel, selected with independent data (see [Methods](#); Voxel response modeling). This approach was motivated by the hypothesis that particular stages of the neural network models might best correspond to particular regions of the cortex. By contrast, the baseline model had a single stage intended to model the auditory cortex (preceded by earlier stages intended to capture cochlear processing), and so we derived predictions from this single "cortical" stage. In each case, we then took the median of this explained variance across voxels for a model (averaged across participants).

As shown in [Fig 2A](#), the best-predicting stage of most trained DNN models produced better overall predictions of auditory cortex responses than did the standard SpectroTemporal baseline model [45] (see [S2 Fig](#) for predictivity across model stages). This was true for all of the in-house models as well as about half of the external models developed in engineering contexts. However, some models developed in engineering contexts did not produce good predictions, substantially underpredicting the baseline model. The heterogeneous set of external models was intended to test the generality of brain-DNN relations and sacrificed controlled comparisons between models (because models differed on many dimensions). It is thus difficult to pinpoint the factors that cause some models to produce poor predictions. This finding nonetheless demonstrates that some models that are trained on large amounts of data, and that perform some auditory tasks well, do not accurately predict auditory cortical responses. But the results also show that many models produce better predictions than the classical SpectroTemporal baseline model. As shown in [Fig 2A](#), the results were highly consistent across the 2 fMRI datasets. In addition, results were fairly consistent for different versions of the in-house models trained from different random seeds ([Fig 2B](#)).

### Brain predictions of DNN models depend critically on task optimization

To assess whether the improved predictions compared to the SpectroTemporal baseline model could be entirely explained by the DNN architectures, we performed the same analysis with each model's parameters (for instance, weights, biases) permuted within each model stage ([Fig 2C and 2D](#)). This model manipulation destroyed the parameter structure learned during task optimization, while preserving the model architecture and the marginal statistics of the model parameters. This was intended as replacement for testing untrained models with

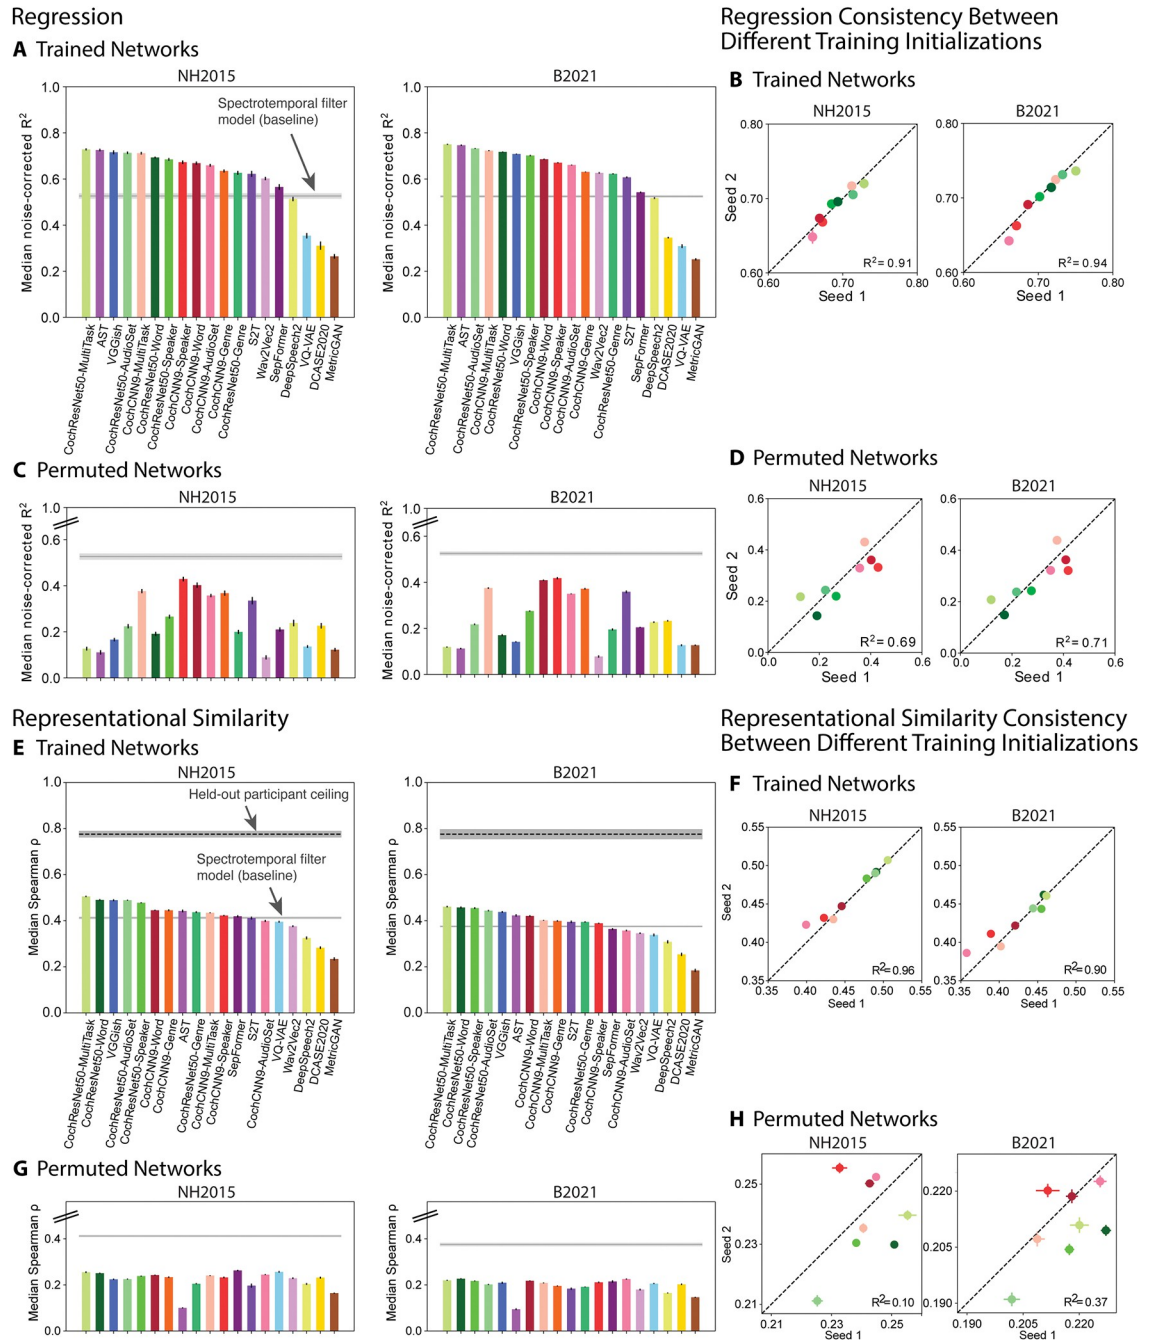

**Fig 2. Evaluation of overall model-brain similarity.** (A) Using regression, explained variance for each voxel, and the aggregated median variance explained was obtained for the best-predicting stage for each model, selected using independent data. Grey line shows variance explained by the SpectroTemporal baseline model. Colors indicate the nature of the model architecture: CochCNN9 architectures in shades of red, CochResNet50 architectures in shades of green, Transformer architectures in shades of violet (AST, Wav2Vec2, S2T, SepFormer), recurrent architectures in shades of yellow (DCASE2020, DeepSpeech2), other convolutional architectures in shades of blue (VGGish, VQ-VAE), and miscellaneous in brown (MetricGAN). Error bars are within-participant SEM. Error bars are smaller for the B2021 dataset because of the larger number of participants ( $n = 20$  vs.  $n = 8$ ). For both datasets, most trained models outperform the baseline model. (B) We trained the in-house models from 2 different random seeds. The median variance explained for the first- and second-seed models are plotted on the x- and y-axes, respectively. Each data point represents a model using the same color scheme as in panel A. (C, D) Same analysis as in panels A and B but for the control networks with permuted weights. All permuted models produce worse predictions than the baseline. (E) Representational similarity between all auditory cortex fMRI responses and the trained computational models. The models and colors are the same as in panel A. The dashed black line shows the noise ceiling measured by comparing one participant's RDM with the average of the RDMs from the other

participants (we plot the noise ceiling rather than noise correcting as in the regression analyses in order to be consistent with what is standard for each analysis). Error bars are within-participant SEM. As in the regression analysis, many of the trained models exhibit RDMs that are more correlated with the human RDM than is the baseline model's RDM. (F) The Spearman correlation between the model and fMRI RDMs for 2 different seeds of the in-house models. The results for the first and second seeds are plotted on the x- and y-axes, respectively. Each data point represents a model using the same color scheme as in panel E. (G, H) Same analysis as in panels E and F but with the control networks with permuted weights. RDMs for all permuted models are less correlated with the human RDM compared to the baseline model's correlation with the human RDM. Data and code with which to reproduce results are available at [https://github.com/gretatuckute/auditory\\_brain\\_dnn](https://github.com/gretatuckute/auditory_brain_dnn).

<https://doi.org/10.1371/journal.pbio.3002366.g002>

randomly initialized weights [31], the advantage being that it seemed a more conservative test for the external models, for which the initial weight distributions were in some cases unknown.

In all cases, these control models produced worse predictions than the trained models, and in no case did they outpredict the baseline model. This result indicates that task optimization is consistently critical to obtaining good brain predictions. It also provides evidence that the presence of multiple model stages (and selection of the best-predicting stage) is not on its own sufficient to cause a DNN model to outpredict the baseline model. These conclusions are consistent with previously published results [31] but substantiate them on a much broader set of models and tasks.

### Qualitatively similar conclusions from representational similarity

To ensure that the conclusions from the regression-based analyses were robust to the choice of model-brain similarity metric, we conducted analogous analyses using representational similarity. Analyses of representational similarity gave qualitatively similar results to those with regression. We computed the Spearman correlation between the RDM for all auditory cortex voxels and that for the unit activations of each stage of each model, choosing the model stage that yielded the best match. We used 83 of the sounds to choose the best-matching model stage and then measured the model-brain RDM correlation for RDMs computed for the remaining 82 sounds. We performed this procedure with 10 different splits of the sounds, averaging the correlation across the 10 splits. This analysis showed that most of the models in our set had RDMs that were more correlated with the human auditory cortex RDM than that of the baseline model (Fig 2E), and the results were consistent across 2 trained instantiations of the in-house models (Fig 2F). Moreover, the 2 measures of model-brain similarity (variance explained and correlation of RDMs) were correlated in the trained networks ( $R^2 = 0.75$  for NH2015 and  $R^2 = 0.79$  for B2021,  $p < 0.001$ ), with models that showed poor matches on one metric tending to show poor matches on the other. The correlations with the human RDM were nonetheless well below the noise ceiling and not much higher than those for the baseline model, indicating that none of the models fully accounts for the fMRI representational similarity. As expected, the RDMs for the permuted models were less similar to that for human auditory cortex, never exceeding the correlation of the baseline model (Fig 2G and 2H). Overall, these results provide converging evidence for the conclusions of the regression-based analyses.

### Improved predictions of DNN models are most pronounced for pitch, speech, and music-selective responses

To examine the model predictions for specific tuning properties of the auditory cortex, we used a previously derived set of cortical response components. Previous work [50] found that cortical voxel responses to natural sounds can be explained as a linear combination of 6 response components (Fig 3A). These 6 components can be interpreted as capturing the tuning properties of underlying neural populations. Two of these components were well

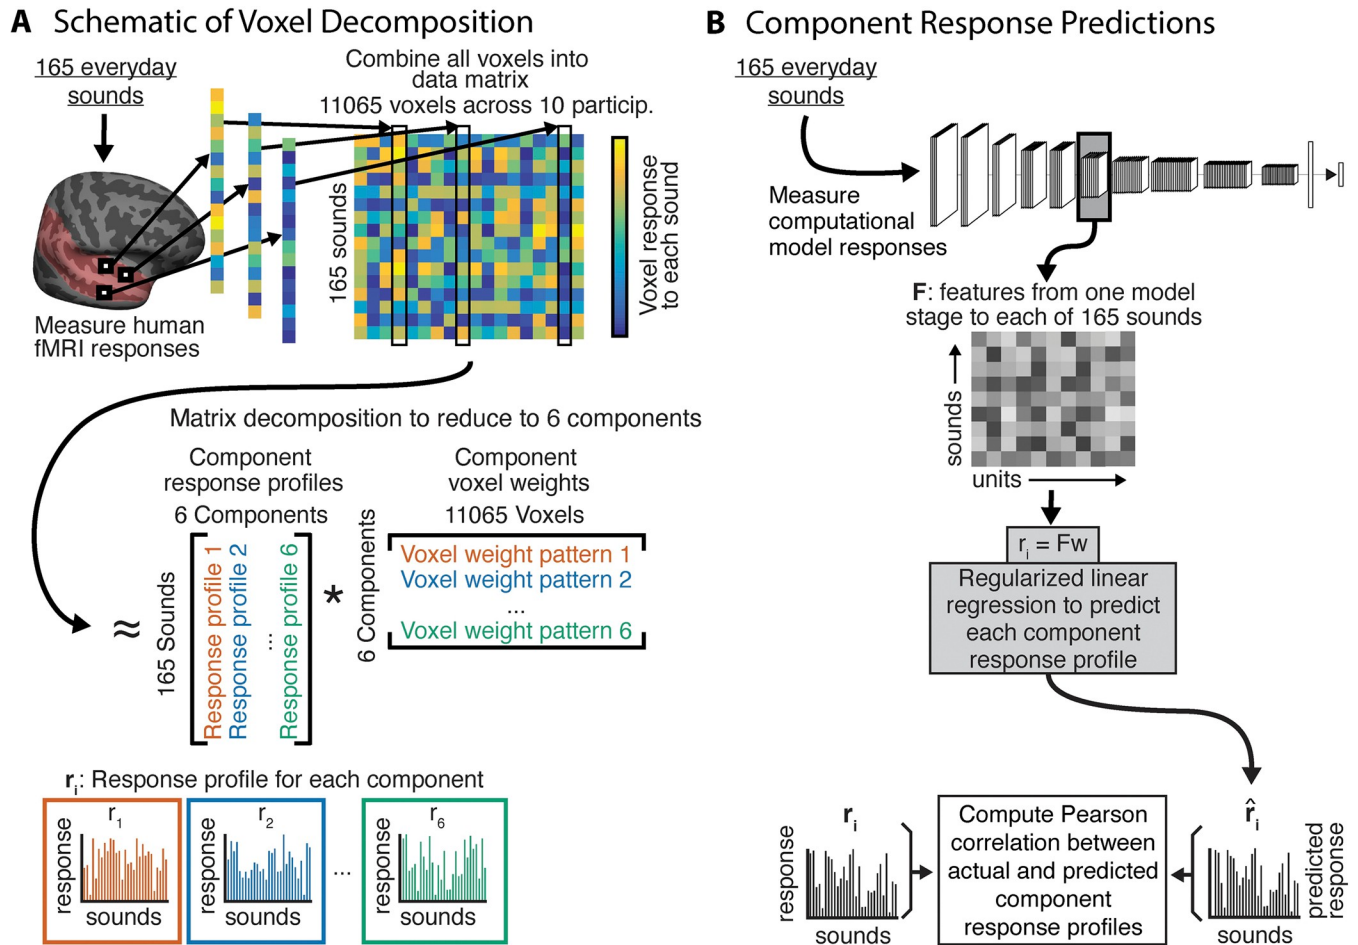

**Fig 3. Component decomposition of fMRI responses.** (A) Voxel component decomposition method. The voxel responses of a set of participants are approximated as a linear combination of a small number of component response profiles. The solution to the resulting matrix factorization problem is constrained to maximize a measure of the non-Gaussianity of the component weights. Voxel responses in auditory cortex to natural sounds are well accounted for by 6 components. Figure adapted from Norman-Haignere and colleagues’ article [50]. (B) We generated model predictions for each component’s response using the same approach used for voxel responses, in which the model unit responses were combined to best predict the component response, with explained variance measured in held-out sounds (taking the median of the explained variance values obtained across train/test cross-validation splits).

<https://doi.org/10.1371/journal.pbio.3002366.g003>

accounted for by audio frequency tuning, and 2 others were relatively well explained by tuning to spectral and temporal modulation frequencies. One of these latter 2 components was selective for sounds with salient pitch. The remaining 2 components were highly selective for speech and music, respectively. The 6 components had distinct (though overlapping) anatomical distributions, with the components selective for pitch, speech, and music most prominent in different regions of non-primary auditory cortex. These components provide one way to examine whether the improved model predictions seen in Fig 2 are specific to particular aspects of cortical tuning.

We again used regression to generate model predictions, but this time using the component responses rather than voxel responses (Fig 3B). We fit a linear mapping from the unit activations in a model stage (for a subset of “training” sounds) to the component response, then measured the predictions for left-out “test” sounds, averaging the predictions across test splits. The main difference between the voxel analyses and the component analyses is that we did not noise-correct the estimates of explained component variance. This is because we could not

estimate test-retest reliability of the components, as they were derived with all 3 scans worth of data. We also restricted this analysis to regression-based predictions because representational similarity cannot be measured from single response components.

Fig 4A shows the actual component responses (from the dataset of Norman-Haignere and colleagues [50]) plotted against the predicted responses for the best-predicting model stage (selected separately for each component) of the multitask CochResNet50, which gave the best overall voxel response predictions (Fig 2). The model replicates most of the variance in all components (between 61% and 88% of the variance, depending on the component). Given that 2 of the components are highly selective for particular categories, one might suppose that the good predictions in these cases could be primarily due to predicting higher responses for some categories than others, and the model indeed reproduces the differences in responses to different sound categories (for instance, with high responses to speech in the speech-selective component, and high responses to music in the music-selective component). However, it also replicates some of the response variance within sound categories. For instance, the model predictions explained 51.9% of the variance in responses to speech sounds in the speech-selective component, and 53.5% of the variance in the responses to music sounds in the music-selective component (both of these values are much higher than would be expected by chance; speech:  $p = 0.001$ ; music:  $p < 0.001$ ). We note that although we could not estimate the reliability of the components in a way that could be used for noise correction, in a previous paper, we measured their similarity between different groups of participants, and this was lowest for component 3, followed by component 6 [51]. Thus, the differences between components in the overall quality of the model predictions are plausibly related to their reliability.

The component response predictions were much worse for models with permuted weights, as expected given the results of Fig 2 (Fig 4B; results shown for the permuted multitask CochResNet50; results were similar for other models with permuted weights, though not always as pronounced). The notable exceptions were the first 2 components, which reflect frequency tuning [50]. This is likely because frequency information is made explicit by a convolutional architecture operating on a cochlear representation, irrespective of the model weights. For comparison, we also show the component predictions for the SpectroTemporal baseline model (Fig 4C). These are significantly better than those of the best-predicting stage of the permuted CochResNet50MultiTask model (one-tailed  $p < 0.001$ ; permutation test) but significantly worse than those of the trained CochResNet50MultiTask model for all 6 components (one-tailed  $p < 0.001$ ; permutation test).

These findings held across most of the neural network models we tested. Most of the trained neural network models produced better predictions than the SpectroTemporal baseline model for most of the components (Fig 5A), with the improvement being specific to the trained models (Fig 5B). However, it is also apparent that the difference between the trained and permuted models is most pronounced for components 4 to 6 (selective for pitch, speech, and music, respectively; compare Fig 5A and 5B). This result indicates that the improved predictions for task-optimized models are most pronounced for higher-order tuning properties of auditory cortex.

### Many DNN models exhibit model-stage-brain-region correspondence with auditory cortex

One of the most intriguing findings from the neuroscience literature on DNN models is that the models often exhibit some degree of correspondence with the hierarchical organization of sensory systems [13–16,31,66], with particular model stages providing the best matches to responses in particular brain regions. To explore the generality of this correspondence for

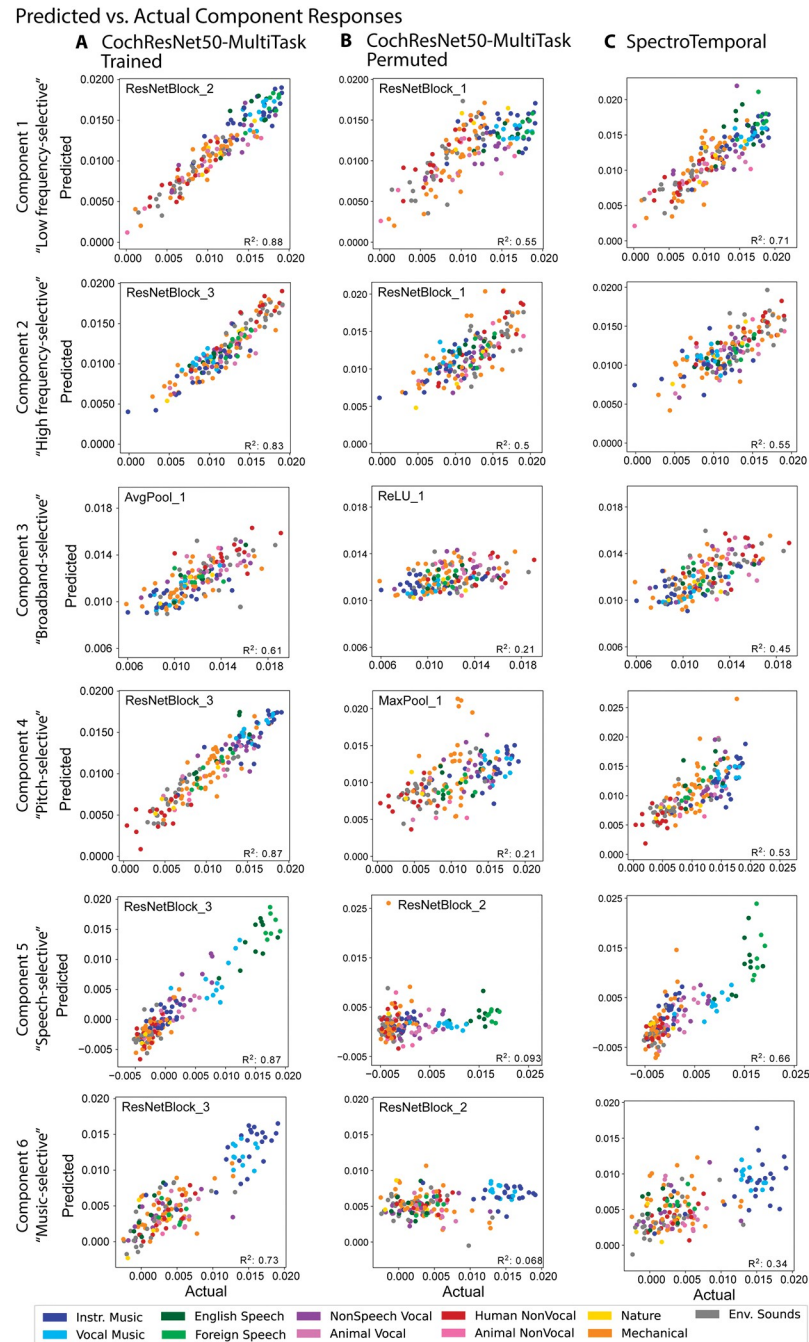

**Fig 4. Example model predictions for 6 components of fMRI responses to natural sounds.** (A) Predictions of the 6 components by a trained DNN model (CochResNet50-MultiTask). Each data point corresponds to a single sound from the set of 165 natural sounds. Data point color denotes the sound's semantic category. Model predictions were made from the model stage that best predicted a component's response. The predicted response is the average of the predictions for a sound across the test half of 10 different train-test splits (including each of the splits for which the sound was present in the test half). (B) Predictions of the 6 components by the same model used in (A) but with permuted weights. Predictions are substantially worse than for the trained model, indicating that task optimization is important for obtaining good predictions, especially for components 4–6. (C) Predictions of the 6 components by the SpectroTemporal model. Predictions are substantially worse than for the trained model, particularly for components 4–6. Data and code with which to reproduce results are available at [https://github.com/gretatuckute/auditory\\_brain\\_dnn](https://github.com/gretatuckute/auditory_brain_dnn).

<https://doi.org/10.1371/journal.pbio.3002366.g004>

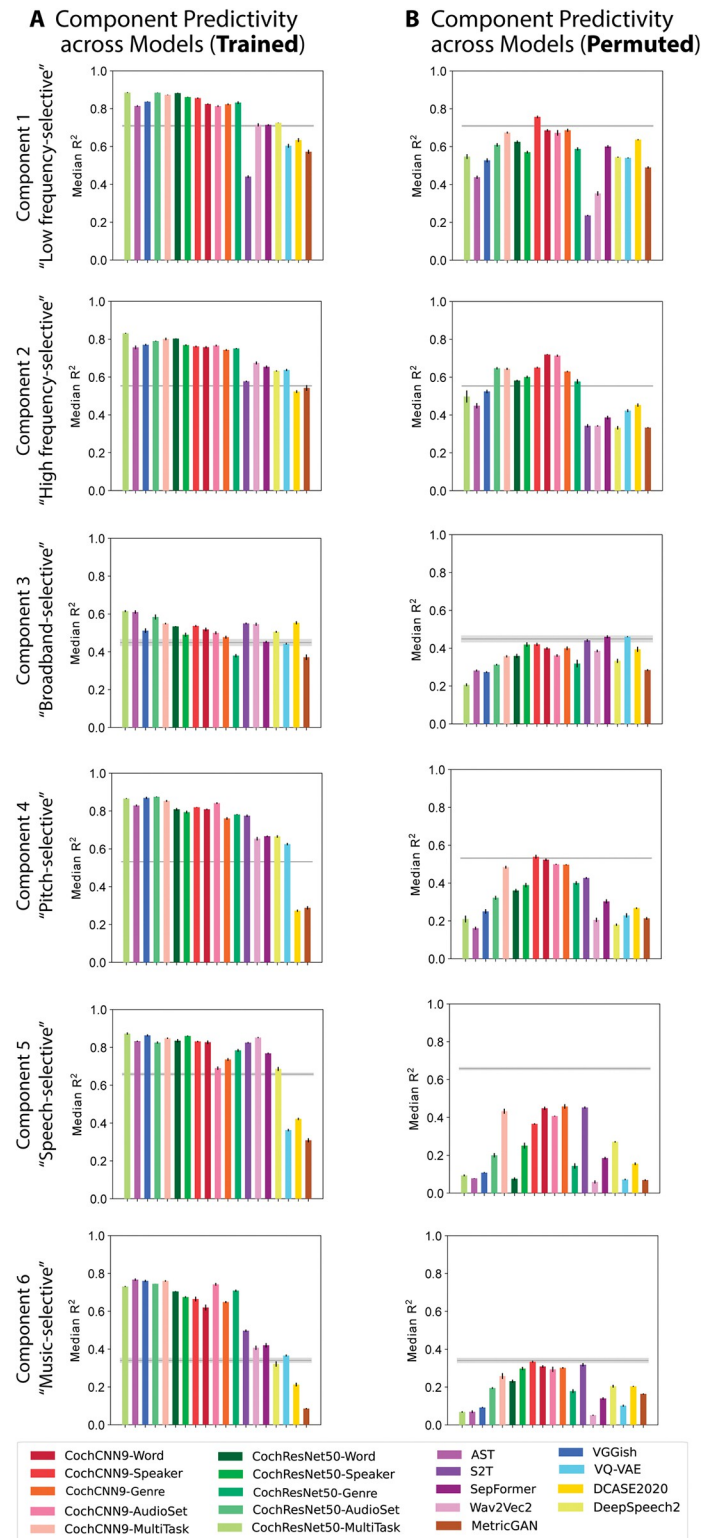

**Fig 5. Summary of model predictions of fMRI response components.** (A) Component response variance explained by each of the trained models. Model ordering is the same as that in Fig 2A for ease of comparison. Variance explained was obtained from the best-predicting stage of each model, selected using independent data. Error bars are SEM over iterations of the model stage selection procedure (see Methods; Component modeling). See S3 Fig for a comparison of results for models trained with different random seeds (results were overall similar for different

seeds). (B) Component response variation explained by each of the permuted models. The trained models (both in-house and external), but not the permuted models, tend to outpredict the SpectroTemporal baseline for all components, but the effect is most pronounced for components 4–6. Data and code with which to reproduce results are available at [https://github.com/gretatuckute/auditory\\_brain\\_dnn](https://github.com/gretatuckute/auditory_brain_dnn).

<https://doi.org/10.1371/journal.pbio.3002366.g005>

audio-trained models, we first examined the best-predicting model stage for each voxel of each participant in the 2 fMRI datasets, separately for each model. We used regression-based predictions for this analysis as it was based on single voxel responses.

We first plotted the best-predicting stage as a surface map displayed on an inflated brain. The best-predicting model stage for each voxel was expressed as a number between 0 and 1, and we plot the median of this value across participants. In both datasets and for most models, earlier model stages tended to produce the best predictions of primary auditory cortex, while deeper model stages produced better predictions of non-primary auditory cortex. We show these maps for the 8 best-predicting models in Fig 6A and provide them for all remaining models in S4 Fig. There was some variation from model to model, both in the relative stages that yield the best predictions and in the detailed anatomical layout of the resulting maps, but the differences between primary and non-primary auditory cortex were fairly consistent across models. The stage-region correspondence was specific to the trained models; the models with permuted weights produce relatively uniform maps (S5 Fig).

To summarize these maps across models, we computed the median best stage for each voxel across all 15 models that produced better overall predictions compared to the baseline model (Fig 2A). The resulting map provides a coarse measure of the central tendency of the individual model maps (at the cost of obscuring the variation that is evident across models). If there was no consistency across the maps for different models, this map should be uniform. Instead, the best-stage summary map (Fig 6B) shows a clear gradient, with voxels in and around primary auditory cortex (black outline) best predicted by earlier stages than voxels beyond primary auditory cortex. This correspondence is lost when the weights are permuted, contrary to what would be expected if the model architecture was primarily responsible for the correspondence (Fig 6C).

To quantify the trends that were subjectively evident in the surface maps, we computed the average best stage within 4 anatomical regions of interest (ROIs): one for primary auditory cortex, along with 3 ROIs for posterior, lateral, and anterior non-primary auditory cortex. These ROIs were combinations of subsets of ROIs in the Glasser [67] parcellation (Fig 7A). The ROIs were taken directly from a previous publication [51], where they were intended to capture the auditory cortical regions exhibiting reliable responses to natural sounds and were not adapted in any way to the present analysis. We visualized the results of this analysis by plotting the average best stage for the primary ROI versus that of each of the non-primary ROIs, expressing the stage's position within each model as a number between 0 and 1 (Fig 7B). In each case, nearly all models lie above the diagonal (Fig 7C), indicating that all 3 regions of non-primary auditory cortex are consistently better predicted by deeper model stages compared to primary auditory cortex, irrespective of the model. This result was statistically significant in each case (Wilcoxon signed rank test: two-tailed  $p < 0.005$  for all 6 comparisons; 2 datasets  $\times$  3 non-primary ROIs). By comparison, there was no clear evidence for differences between the 3 non-primary ROIs (two-tailed Wilcoxon signed rank test: after Bonferroni correction for multiple comparisons, none of the 6 comparisons reached statistical significance at the  $p < 0.05$  level; 2 datasets  $\times$  3 comparisons). See S6 Fig for the variance explained by each model stage for each model for the 4 ROIs.

To confirm that these results were not merely the result of the DNN architectural structure (for instance, with pooling operations tending to produce larger receptive fields at deeper



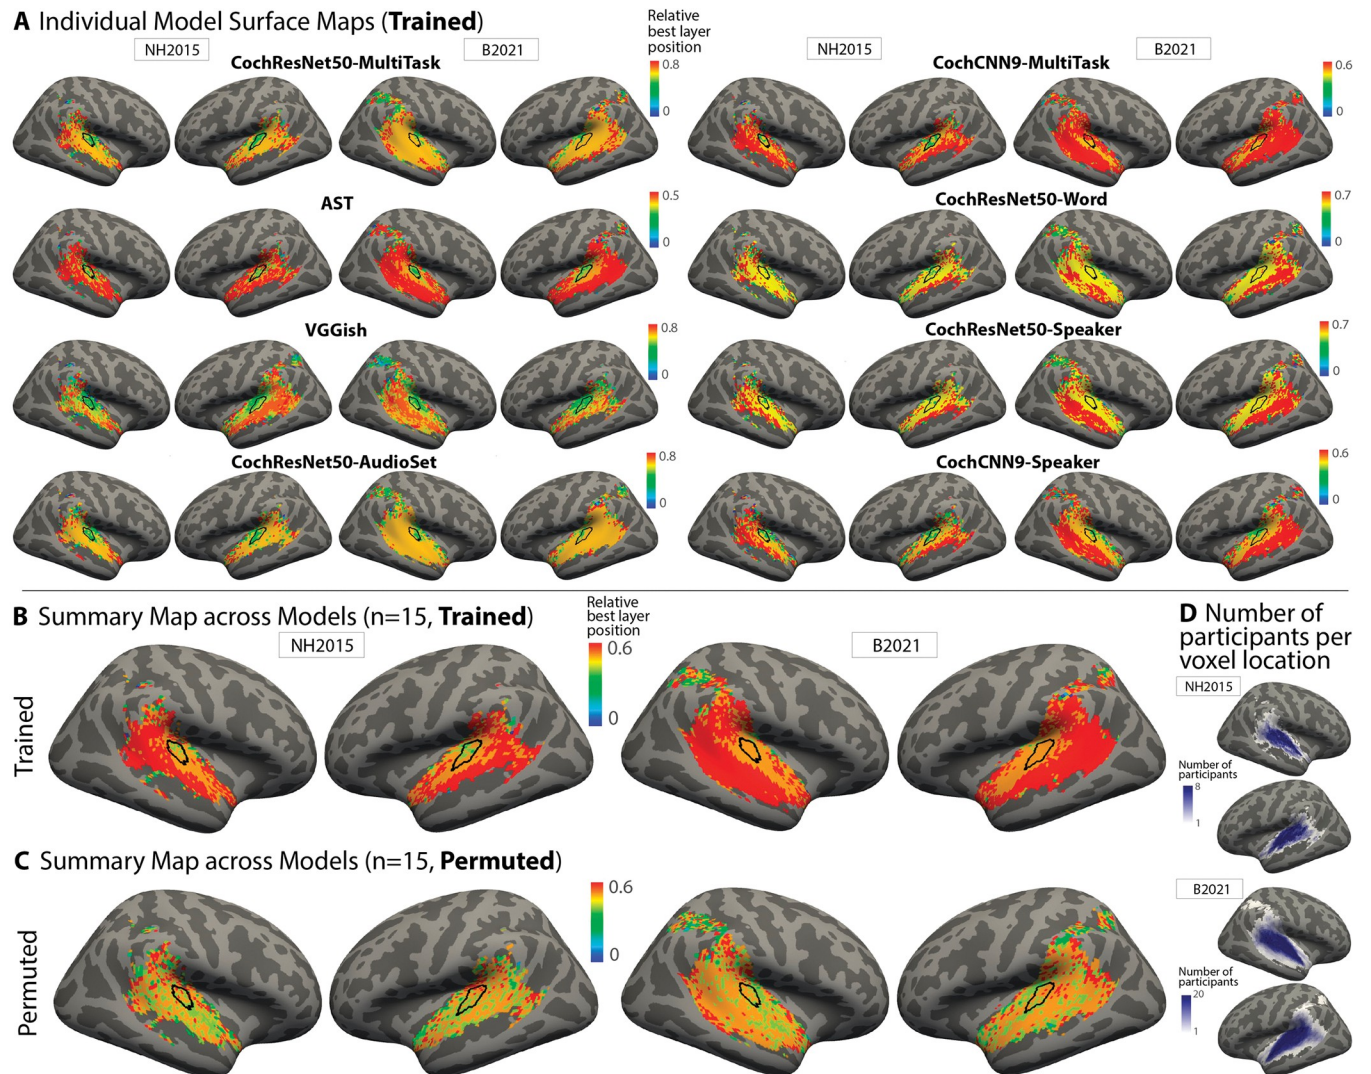

**Fig 6. Surface maps of best-predicting model stage.** (A) To investigate correspondence between model stages and brain regions, we plot the model stage that best predicts each voxel as a surface map (FsAverage) (median best stage across participants). We assigned each model stage a position index between 0 and 1 (using minmax normalization such that the first stage is assigned a value of 0 and the last stage a value of 1). We show this map for the 8 best-predicting models as evaluated by the median noise-corrected  $R^2$  plotted in Fig 2A (see S4 Fig for maps from other models). The color scale limits were set to extend from 0 to the stage beyond the most common best stage (across voxels). We found that setting the limits in this way made the variation across voxels in the best stage visible by not wasting dynamic range on the deep model stages, which were almost never the best-predicting stage. Because the relative position of the best-predicting stage varied across models, the color bar scaling varies across models. For both datasets, middle stages best predict primary auditory cortex, while deep stages best predict non-primary cortex. We note that the B2021 dataset contained voxel responses in parietal cortex, some of which passed the reliability screen. We have plotted a best-predicting stage for these voxels in these maps for consistency with voxel inclusion criteria in the original publication [51], but note that these voxels only passed the reliability screen in a few participants (see panel D) and that the variance explained for these voxels was low, such that the best-predicting stage is not very meaningful. (B) Best-stage map averaged across all models that produced better predictions than the baseline SpectroTemporal model. The map plots the median value across models and thus is composed of discrete color values. The thin black outline plots the borders of an anatomical ROI corresponding to primary auditory cortex. (C) Best-stage map for the same models as in panel B, but with permuted weights. (D) Maps showing the number of participants per voxel location on the FsAverage surface for both datasets (1–8 participants for NH2015; 1–20 participants for B2021). Darker colors denote a larger number of participants per voxel. Because we only analyzed voxels that passed a reliability threshold, some locations only passed the threshold in a few participants. Note also that the regions that were scanned were not identical in the 2 datasets. Data and code with which to reproduce results are available at [https://github.com/gretatuckute/auditory\\_brain\\_dnn](https://github.com/gretatuckute/auditory_brain_dnn).

<https://doi.org/10.1371/journal.pbio.3002366.g006>

stages compared to earlier stages), we performed the same analysis on the models with permuted weights. In this case, the results showed no evidence for a mapping between model stages and brain regions (S7A Fig; no significant difference between primary and non-primary

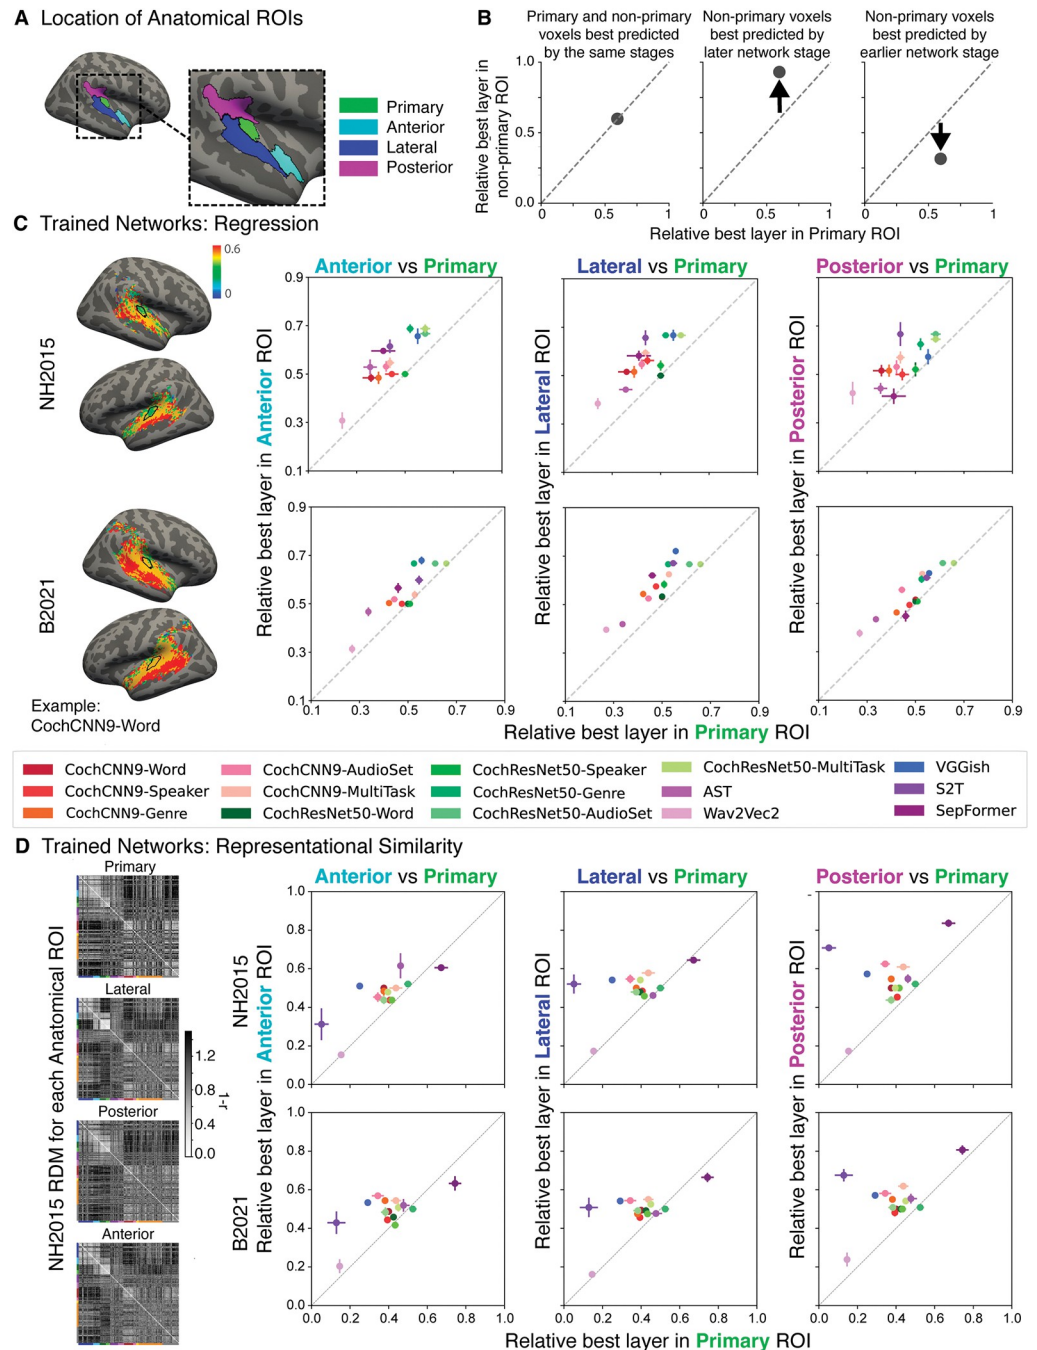

**Fig 7. Nearly all DNN models exhibit stage-region correspondence.** (A) Anatomical ROIs for analysis. ROIs were taken from a previous study [51], in which they were derived by pooling ROIs from the Glasser anatomical parcellation [67]. (B) To summarize the model-stage-brain-region correspondence across models, we obtained the median best-predicting stage for each model within the 4 anatomical ROIs from A: primary auditory cortex (x-axis in each plot in C and D) and anterior, lateral, and posterior non-primary regions (y-axes in C and D) and averaged across participants. (C) We performed the analysis on each of the 2 fMRI datasets, including each model that outperformed the baseline model in Fig 2 ( $n = 15$  models). Each data point corresponds to a model, with the same color correspondence as in Fig 2. Error bars are within-participant SEM. The non-primary ROIs are consistently best predicted by later stages than the primary ROI. (D) Same analysis as (C) but with the best-matching model stage determined by correlations between the model and ROI representational dissimilarity matrices. RDMs for each anatomical ROI (left) are grouped by sound category, indicated by colors on the left and bottom edges of each RDM (same color-category correspondence as in Fig 4). Higher-resolution fMRI RDMs for each ROI including the name of each sound are provided in S1 Fig. Data and code with which to reproduce results are available at [https://github.com/gretatuckute/auditory\\_brain\\_dnn](https://github.com/gretatuckute/auditory_brain_dnn).

<https://doi.org/10.1371/journal.pbio.3002366.g007>

ROIs in any of the 6 cases; Wilcoxon signed rank tests, two-tailed  $p > 0.16$  in all cases). This result is consistent with the surface maps (Figs 6C and S5), which tended to be fairly uniform.

We repeated the ROI analysis using representational similarity to determine the best-matching model stage for each ROI and obtained similar results. The model stages with representational geometry most similar to that of non-primary ROIs were again situated later than the model stage most similar to the primary ROI, in both datasets (Fig 7D; Wilcoxon signed rank test: two-tailed  $p < 0.007$  for all 6 comparisons; 2 datasets  $\times$  3 non-primary ROIs). The model stages that provided the best match to each ROI according to each of the 2 metrics (regression and representational similarity analysis) were correlated ( $R^2 = 0.21$  for NH2015 and  $R^2 = 0.21$  for B2021, measured across the 60 best stage values from 15 trained models for the 4 ROIs of interest,  $p < 0.0005$  in both cases). This correlation is highly statistically significant but is nonetheless well below the maximum it could be given the reliability of the best stages (conservatively estimated as the correlation of the best stage between the 2 fMRI datasets;  $R^2 = 0.87$  for regression and  $R^2 = 0.94$  for representational similarity). This result suggests that the 2 metrics capture different aspects of model-brain similarity and that they do not fully align for the models we have at present, even though the general trend for deeper stages to better predict non-primary responses is present in both cases.

Overall, these results are consistent with the stage-region correspondence findings of Kell and colleagues [31] but show that they apply fairly generally to a wide range of DNN models, that they replicate across different brain datasets, and are generally consistent across different analysis methods. The results suggest that the different representations learned by early and late stages of DNN models map onto differences between primary and non-primary auditory cortex in a way that is qualitatively consistent across a diverse set of models. This finding provides support for the idea that primary and non-primary human auditory cortex instantiate distinct types of representations that resemble earlier and later stages of a computational hierarchy. However, the specific stages that best align with particular cortical regions vary across models and depend on the metric used to evaluate alignment. Together with the finding that all model predictions are well below the maximum attainable value given the measurement noise (Fig 2), these results indicate that none of the tested models fully account for the representations in human auditory cortex.

### Presence of noise in training data modulates model predictions

We found in our initial analysis that many models produced good predictions of auditory cortical brain responses, in that they outperformed the SpectroTemporal baseline model (Fig 2). But some models gave better predictions than others, raising the question of what causes differences in model predictions. To investigate this question, we analyzed the effect of (a) the training data and (b) the training task the model was optimized for, using the in-house models that consisted of the same 2 architectures trained on different tasks.

Out of the many manipulations of training data that one could in principle test, the presence of background noise was of particular theoretical interest. Background noise is ubiquitous in real-world auditory environments, and the auditory system is relatively robust to its presence [31,68–75], suggesting that it might be important in shaping auditory representations. For this reason, the previous models in Kell and colleagues' article [31], as well as the in-house model extensions shown in Fig 2, were all trained to recognize words and speakers in noise (on the grounds that this is more ecologically valid than training exclusively on "clean" speech). We previously found in the domains of pitch perception [32] and sound localization [33] that optimizing models for natural acoustic conditions (including background noise among other factors) was critical to reproducing the behavioral characteristics of human

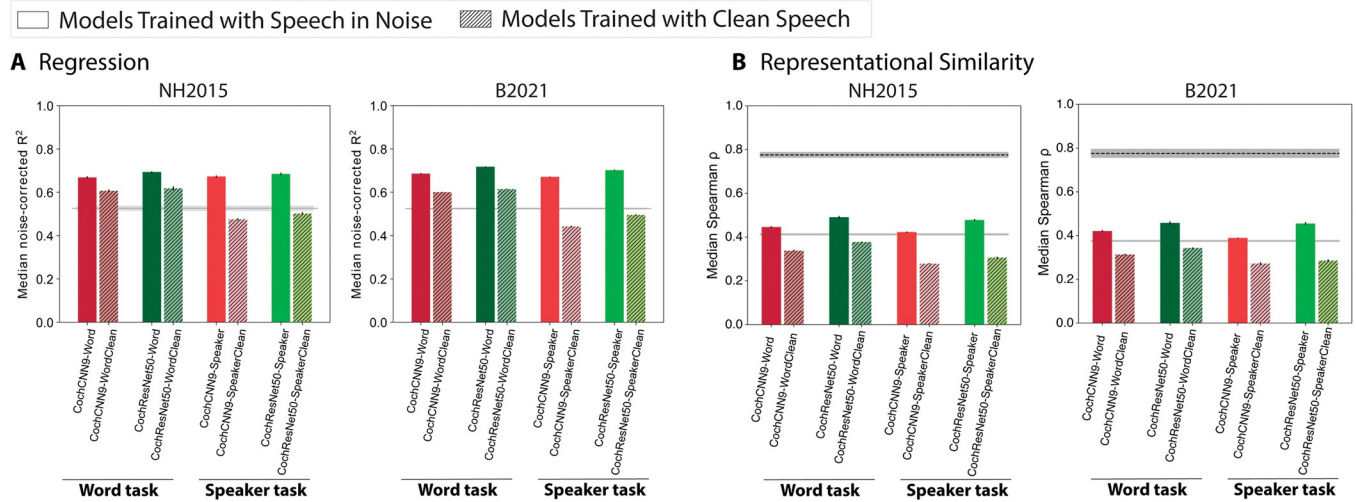

**Fig 8. Model predictions of brain responses are better for models trained in background noise.** (A) Effect of noise in training on model-brain similarity assessed via regression. Using regression, explained variance was measured for each voxel and the aggregated median variance explained was obtained for the best-predicting stage for each model, selected using independent data. Grey line shows variance explained by the SpectroTemporal baseline model. Colors indicate the nature of the model architecture with CochCNN9 architectures in shades of red, and CochResNet50 architectures in shades of green. Models trained in the presence of background noise are shown in the same color scheme as in Fig 2; models trained with clean speech are shown with hashing. Error bars are within-participant SEM. For both datasets, the models trained in the presence of background noise exhibit higher model-brain similarity than the models trained without background noise. (B) Effect of noise in training on model-brain representational similarity. Same conventions as (A), except that the dashed black line shows the noise ceiling measured by comparing one participant’s RDM with the average of the RDMs from each of the other participants. Error bars are within-participant SEM. Data and code with which to reproduce results are available at [https://github.com/gretatuckute/auditory\\_brain\\_dnn](https://github.com/gretatuckute/auditory_brain_dnn).

<https://doi.org/10.1371/journal.pbio.3002366.g008>

perception, but it was not clear whether model-brain similarity metrics would be analogously affected. To test whether the presence of noise in training influences model-brain similarity, we retrained both in-house model architectures on the word and speaker recognition tasks using just the speech stimuli from the Word-Speaker-Noise dataset (without added noise). We then repeated the analyses of Figs 2 and 5.

As shown in Fig 8, models trained exclusively on clean speech produced significantly worse overall brain predictions compared to those trained on speech in noise. This result held for both the word and speaker recognition tasks and for both model architectures (regression:  $p < 0.001$  via one-tailed bootstrap test for each of the 8 comparisons, 2 datasets  $\times$  4 comparisons; representational similarity:  $p < 0.001$  in each case for same comparisons). The result was not specific to speech-selective brain responses, as the boost from training in noise was seen for each of the pitch-selective, speech-selective, and music-selective response components (S8 Fig). This training data manipulation is obviously one of many that are in principle possible and does not provide an exhaustive examination of the effect of training data, but the results are consistent with the notion that optimizing models for sensory signals like those for which biological sensory systems are plausibly optimized increases the match to brain data. They are also consistent with findings that machine speech recognition systems, which are typically trained on clean speech (usually because there are separate systems to handle denoising), do not always reproduce characteristics of human speech perception [76,77].

### Training task modulates model predictions

To assess the effect of the training task a model was optimized for, we analyzed the brain predictions of the in-house models, which consisted of the same 2 architectures trained on different tasks. The results shown in Fig 2 indicate that some of our in-house tasks (word, speaker, AudioSet, genre tasks) produced better overall predictions than others and that the best overall

model as evaluated with either metric (regression or RDM similarity) was that trained on 3 of the tasks simultaneously (the CochResNet50-MultiTask).

To gain insight into the source of these effects, we examined the in-house model predictions for the 6 components of auditory cortical responses (Fig 3) that vary across brain regions. The components seemed a logical choice for an analysis of the effect of task on model predictions because they isolate distinct cortical tuning properties. We focused on the pitch-selective, speech-selective, and music-selective components because these showed the largest effects of model training (components 4 to 6, Figs 4 and 5) and because the tasks that we trained on seemed a priori most likely to influence representations of these types of sounds. This analysis was necessarily restricted to the regression-based model predictions because RDMs are not defined for any single component's response.

A priori, it was not clear what to expect. The representations learned by neural networks are a function both of the training stimuli and the task they are optimized for [32,33], and in principle, either (or both) could be critical to reproducing the tuning found in the brain. For instance, it seemed plausible that speech and music selectivity might only become strongly evident in systems that must perform speech- and music-related tasks. However, given the distinct acoustic properties of speech, music and pitch, it also seemed plausible that they might naturally segregate within a distributed neural representation simply from generic representational constraints that might occur for any task, such as the need to represent sounds efficiently [78–80] (here imposed by the finite number of units in each model stage). Our in-house tasks allowed us to distinguish these possibilities, because the training stimuli were held constant (for 3 of the tasks and for the multitask model; the music genre task involved a distinct training set), with the only difference being the labels that were used to compute the training loss. Thus, any differences in predictions between these models reflect changes in the representation due to behavioral constraints rather than the training stimuli.

We note that the AudioSet task consists of classifying sounds within YouTube video soundtracks, and the sounds and associated labels are diverse. In particular, it includes many labels associated with music—both musical genres and instruments (67 and 78 classes, respectively, out of 516 total). By comparison, our musical genre classification task contained exclusively genre labels, but only 41 of them. It thus seemed plausible that the AudioSet task might produce music- and pitch-related representations.

Comparisons of the variance explained in each component revealed interpretable effects of the training task (Fig 9). The pitch-selective component was best predicted by the models trained on AudioSet ( $R^2$  was higher for AudioSet-trained model than for the word-, speaker-, or genre-trained models in both the CochCNN9 and CochResNet50 architectures, one-tailed  $p < 0.005$  for all 6 comparisons, permutation test). The speech-selective component was best predicted by the models trained on speech tasks. This was true both for the word recognition task ( $R^2$  higher for the word-trained model than for the genre- or AudioSet-trained models for both architectures, one-tailed  $p < 0.0005$  for 3 out of 4 comparisons;  $p = 0.19$  for CochResNet50-Word versus AudioSet) and for the speaker recognition task (one-tailed  $p < 0.005$  for all 4 comparisons). Finally, the music-selective component was best predicted by the models trained on AudioSet ( $R^2$  higher for the AudioSet-trained model than for the word-, speaker-, or genre-trained models for both architectures,  $p < 0.0005$  for all 6 comparisons), consistent with the presence of music-related classes in this task. We note also that the component was less well predicted by the models trained to classify musical genre. This latter result may indicate that the genre dataset/task does not fully tap into the features of music that drive cortical responses. For instance, some genres could be distinguished by the presence or absence of speech, which may not influence the music component's response [50,51] (but which could enable the representations learned from the genre task to predict the speech component). Note

## A Component Predictions Grouped by Task

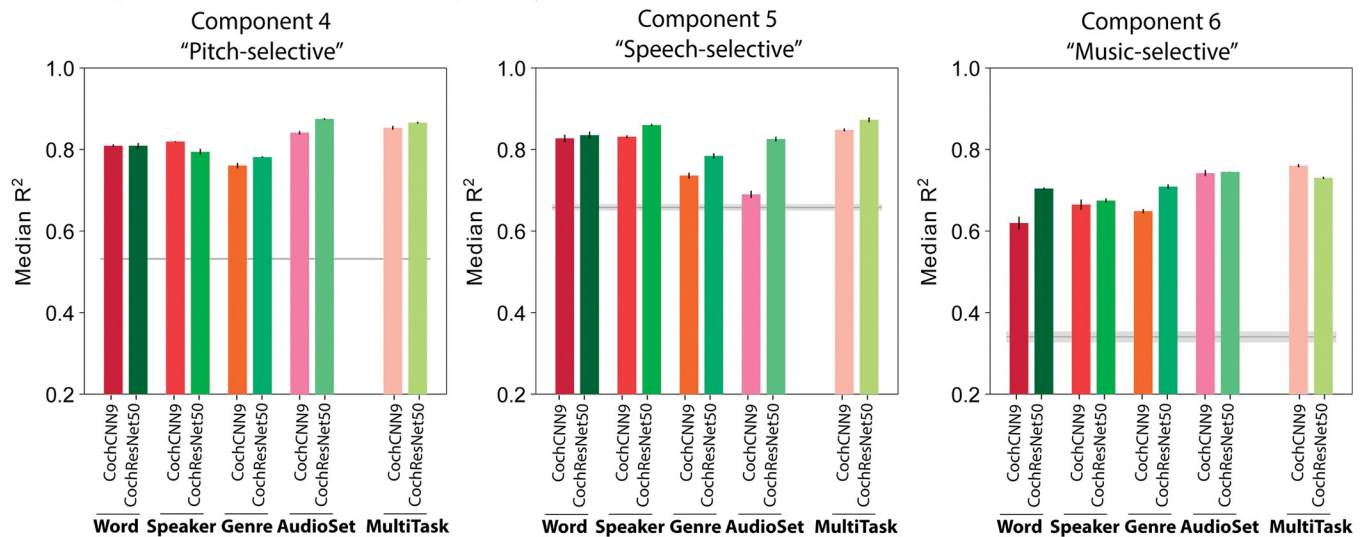

## B Component Predictions Grouped by Component

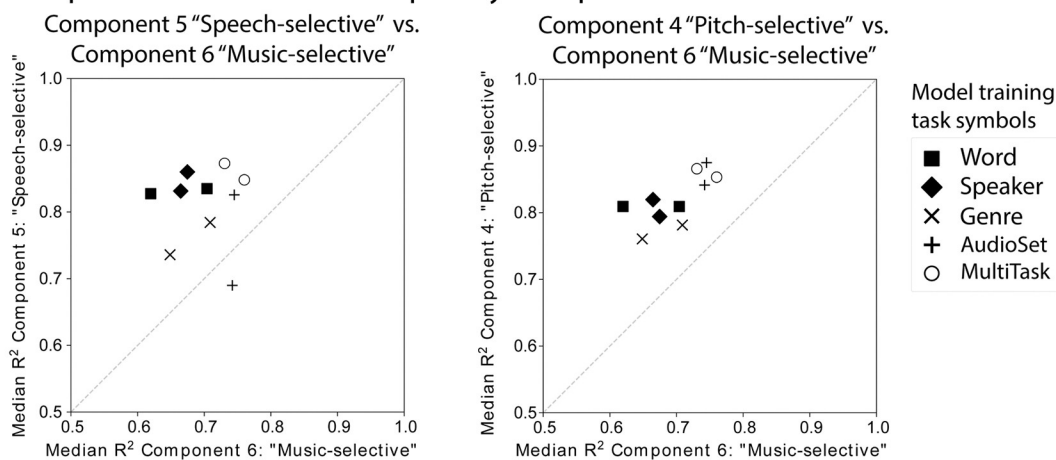

**Fig 9. Training task modulates model predictions.** (A) Component response variance explained by each of the trained in-house models. Predictions are shown for components 4–6 (pitch-selective, speech-selective, and music-selective, respectively). The in-house models were trained separately on each of 4 tasks as well as on 3 of the tasks simultaneously, using 2 different architectures. Explained variance was measured for the best-predicting stage of each model for each component selected using independent data. Error bars are SEM over iterations of the model stage selection procedure (see [Methods](#); Component modeling). Grey line plots the variance explained by the SpectroTemporal baseline model. (B) Scatter plots of in-house model predictions for pairs of components. The upper panel shows the variance explained for component 5 (speech-selective) vs. component 6 (music-selective), and the lower panel shows component 6 (music-selective) vs. component 4 (pitch-selective). Symbols denote the training task. In the left panel, the 4 models trained on speech-related tasks are furthest from the diagonal, indicating good predictions of speech-selective tuning at the expense of those for music-selective tuning. In the right panel, the models trained on AudioSet are set apart from the others in their predictions of both the pitch-selective and music-selective components. Error bars are smaller than the symbol width (and are provided in panel A) and so are omitted for clarity. Data and code with which to reproduce results are available at [https://github.com/gretatuckute/auditory\\_brain\\_dnn](https://github.com/gretatuckute/auditory_brain_dnn).

<https://doi.org/10.1371/journal.pbio.3002366.g009>

that the absolute variance explained in the different components cannot be straightforwardly compared, because the values are not noise corrected (unlike the values for the voxel responses).

The differences between tasks were most evident in scatter plots of the variance explained for pairs of components (Fig 9B). For instance, the speech-trained models are furthest from the diagonal when the variance explained in the speech and music components are compared.

And the AudioSet-trained models, along with the multitask models, are well separated from the other models when the pitch- and music-selective components are compared. Given that these models were all trained on the same sounds, the differences in their ability to replicate human cortical tuning for pitch, music, and speech suggests that these tuning properties emerge in the models from the demands of supporting of specific behaviors. The results do not exclude the possibility that these tuning properties could also emerge through some form of unsupervised learning or from some other combination of tasks. But they nonetheless provide a demonstration that the distinct forms of tuning in the auditory cortex could be a consequence of specialization for domain-specific auditory abilities.

We found that in each component and architecture, the multitask models predicted component responses about as well as the best single-task model. It was not obvious a priori that a model trained on multiple tasks would capture the benefits of each single-task model—one might alternatively suppose that the demands of supporting multiple tasks with a single representation would muddy the ability to predict domain-specific brain responses. Indeed, the multitask models achieved slightly lower task performance than the single-task models on each of the tasks (see [Methods](#); Training CochCNN9 and CochResNet50 models—Word, Speaker, and AudioSet tasks). This result is consistent with the results of Kell and colleagues [31] that dual-task performance was impaired in models that were forced to share representations across tasks [31]. However, this effect evidently did not prevent the multitask model representations from capturing speech- and music-specific response properties. This result indicates that multitask training is a promising path toward better models of the brain, in that the resulting models appear to combine the advantages of individual tasks.

### **Representation dimensionality correlates with model predictivity but does not explain it**

Although the task manipulation showed a benefit of multiple tasks in our in-house models, the task alone does not obviously explain the large variance across external models in the measures of model-brain similarity that we used. Motivated by recent claims that the dimensionality of a model's representation tends to correlate with regression-based brain predictions of ventral visual cortex [81], we examined whether a model's effective dimensionality could account for some of the differences we observed between models ([S9 Fig](#)).

The effective dimensionality is intended to summarize the number of dimensions over which a model's activations vary for a stimulus set and is estimated from the eigenvalues of the covariance matrix of the model activations to a stimulus set (see [Methods](#); Effective dimensionality). Effective dimensionality cannot be greater than the minimum value of either the number of stimuli in the stimulus set or the model's ambient dimensionality (i.e., the number of unit activations) but is typically lower than both of these because the activations of different units in a model can be correlated. Effective dimensionality must limit predictivity when a model's dimensionality is lower than the dimensionality of the underlying neural response, because a low dimensional model response could not account for all of the variance in a high dimensional brain response.

We measured effective dimensionality for each stage of each evaluated model ([S9 Fig](#)). We preprocessed the model activations to match the preprocessing used for the model-brain comparisons. The effective dimensionality for model stages ranged from approximately 1 to approximately 65 for our stimulus set (using the regression analysis preprocessing). By comparison, the effective dimensionality of the fMRI responses was 8.75 (for NH2015) and 5.32 (for B2021). Effective dimensionality tended to be higher in trained than in permuted models and tended to increase from one model stage to the next in trained models. The effective

dimensionality of a model stage was modestly correlated with the stage's explained variance ( $R^2 = 0.19$  and  $0.20$  for NH2015 and B2021, respectively; [S9 Fig](#), panel Aii), and with the model-brain RDM similarity ( $R^2 = 0.15$  and  $0.18$  for NH2015 and B2021, respectively; [S9 Fig](#), panel Bii). However, this correlation was much lower than the reliability of the explained variance measure ( $R^2 = 0.98$ , measured across the 2 fMRI datasets for trained networks; [S9 Fig](#), panel Ai) and the reliability of the model-brain RDM similarity ( $R^2 = 0.96$ ; [S9 Fig](#), panel Bi). Effective dimensionality thus does not explain the majority of the variance across models—there was wide variation in the dimensionality of models with good predictivity and also wide variation in predictivity of models with similar dimensionality.

Intuitively, dimensionality could be viewed as a confound for regression-based brain predictions. High-dimensional model representations might be more likely to produce better regression scores by chance, on the grounds that the regression can pick out a small number of dimensions that approximate the function underlying the brain response, while ignoring other dimensions that are not brain-like. But because the RDM is a function of all of a representation's dimensions, it is not obvious why high dimensionality on its own should lead to higher RDM similarity. The comparable relationship between RDM similarity and dimensionality thus helps to rule out dimensionality as a confound in the regression analyses. In addition, both relationships were quite modest. Overall, the results show that there is a weak relationship between dimensionality and model-brain similarity but that it cannot explain most of the variation we saw across models.

## Discussion

We examined similarities between representations learned by contemporary DNN models and those in the human auditory cortex, using regression and representational similarity analyses to compare model and brain responses to natural sounds. We used 2 different brain datasets to evaluate a large set of models trained to perform audio tasks. Most of the models we evaluated produced more accurate brain predictions than a standard spectrotemporal filter model of the auditory cortex [45]. Predictions were consistently much worse for models with permuted weights, indicating a dependence on task-optimized features. The improvement in predictions with model optimization was particularly pronounced for cortical responses in non-primary auditory cortex selective for pitch, speech, or music. Predictions were worse for models trained without background noise. We also observed task-specific prediction improvements for particular brain responses, for instance, with speech tasks producing the best predictions of speech-selective brain responses. Accordingly, the best overall predictions (aggregating across all voxels) were obtained with models trained on multiple tasks. We also found that most models exhibited some degree of correspondence with the presumptive auditory cortical hierarchy, with primary auditory voxels being best predicted by model stages that were consistently earlier than the best-predicting model stages for non-primary voxels. The training-dependent model-brain similarity and model-stage-brain-region correspondence was evident both with regression and representational similarity analyses. The results indicate that more often than not, DNN models optimized for audio tasks learn representations that capture aspects of human auditory cortical responses and organization.

Our general strategy was to test as many models as we could, and the model set included every audio model with an implementation in PyTorch that was publicly available at the time of our experiments. The motivation for this “kitchen sink” approach was to provide a strong test of the generality of brain-DNN correspondence. The cost is that the resulting model comparisons were uncontrolled—the external models varied in architecture, training task, and training data, such that there is no way to attribute differences between model results to any



one of these variables. To better distinguish the role of the training data and task, we complemented the external models with a set of models built in our lab that enabled a controlled manipulation of task, and some manipulations of the training data. These models had identical architectures, and for 3 of the tasks had the same training data, being distinguished only by which of 3 types of labels the model was asked to predict.

### Insights into the auditory system

What do our results reveal about the auditory system? The main immediate biological contribution lies in providing further evidence and context for functional differentiation between regions of human auditory cortex. Discussions of auditory cortical functional organization commonly revolve around 2 proposed principles. The first is that the cortex is organized hierarchically into a sequence of stages corresponding to cortical regions [31,82–84]. Much of the evidence for hierarchy is associated with speech processing, in that speech-specific responses only emerge outside of primary cortical areas [50,59,85–90,91]. Other evidence for hierarchical organization comes from analyses of responses to natural sounds, which show selective responses to music and song in non-primary auditory cortex [50,51,92]. These non-primary responses occur with longer latencies and longer integration windows [93] than primary cortical responses. In addition, stimuli that are matched in audio and modulation frequency content to natural sounds drive responses in primary, but not non-primary, auditory cortex [57]. Non-primary areas also show greater invariance to real-world background noise [74]. The present results provide a distinct additional type of evidence for a broad distinction between the computational description of primary and non-primary auditory cortex, with primary and non-primary voxels being consistently best predicted by earlier and later stages of hierarchical models, respectively. We note that these results do not speak to the anatomical connections between regions, only to their stimulus selectivity and correspondence to hierarchical computational models. The present results in particular do not necessarily imply that the observed regional differences reflect strictly sequential stages of processing [94]. But they do show that the qualitative relationship to earlier and later model stages is fairly consistent across datasets and models.

The second commonly articulated principle of functional organization is that of domain specificity—the idea that different regions are specialized for different auditory functions. Previous evidence for this idea comes from findings that selectivity for particular stimulus attributes is localized to distinct regions of auditory cortex. In particular, speech selectivity is typically found to be localized to the superior temporal gyrus [50,59,85–90,91], music-selective responses are localized anterior and posterior from primary auditory cortex [50,51,92,95,96], and location-specific responses to the planum temporale [97–101]. The present results provide additional evidence for domain-specific responses, in that particular tasks produced model representations that best predicted particular response components. This was true even though the models in question were trained on identical sound sets. The results indicate that the way sound is used to perform tasks can shape representations in ways that cannot be entirely explained by the distribution of sound features a system is optimized for. The results lend plausibility to the idea that the response selectivity found in the human auditory cortex (to pitch, music, and speech) could arise from optimization for specific tasks, though it does not prove this possibility (because it remains possible that similar tuning properties could emerge from the right type of unsupervised learning).

### How to build a model of auditory cortex?

What do our results reveal about how to build a good model of human auditory cortex? First, they provide broad additional support for the idea that training a hierarchical model to

perform tasks on natural audio signals produces representations that exhibit some alignment with the cortex as measured by 2 commonly used metrics (better alignment than was obtainable by previous generations of models). The fact that many models produce relatively good predictions suggests that these models contain audio features that typically align to some extent with brain representations, at least for the fMRI measurements we are working with, and in the sense of producing responses that are correlated for natural sounds. And the fact that results were consistently worse for models with permuted weights suggests that training is critical to obtaining these features. Second, some models built for engineering purposes produce poor brain predictions. Although the heterogeneity of the models limits our ability to diagnose the factors that underlie these model-brain discrepancies, the result suggests that we should not expect every DNN model to produce strong alignment with the brain. Third, background noise in the training data consistently improved the predictions of models trained on speech tasks. The improvement held for speech-selective responses in addition to responses not specifically related to speech. Thus, even the representation of speech seems to be made more brain-like by training in noise. Fourth, multiple tasks seem to improve predictions. The results suggest that particular tasks produce representations that align well with particular brain responses, such that a model trained on multiple tasks gets the best of all worlds (Fig 9). We note also that the 2 external models that produced model-brain similarity on par with the in-house models were trained on one of the in-house model tasks (AudioSet), further consistent with the idea that the task is important. Fifth, models with higher-dimensional representations are somewhat more likely to produce good matches with the brain. At present, it is not clear what drives this effect, but there was a modest but consistent effect evident with both metrics we used.

A majority of the models we tested produced overall predictivity between 60% and 75% of the explainable variance (for regression-based predictions). These values were well above that of the SpectroTemporal baseline model but well below the noise ceiling. Moreover, the RDM similarity was far below the noise ceiling for all models. This result thus indicates that all current models are inadequate as complete descriptions of auditory fMRI responses. Our results provide some suggestions for how to improve the models, with the main avenue being training on more realistic data and on a more diverse set of tasks, but it remains to be seen whether incremental extensions will be enough to bridge the gap that is evident in our results.

We note that none of the DNN models we tested were designed or tuned in any way to be able to predict brain responses. One of the in-house models was the result of an architecture search, but that search was constrained only to achieve good task performance. Thus, the models were optimized only to be able to carry out particular auditory functions. The advent of publicly available brain/behavior benchmarks [102] raises the possibility that models could be “hacked” to score well on model-brain comparisons, but such benchmarks are not yet in widespread use in audition and played no role in our model development. By contrast, the baseline SpectroTemporal filter model was explicitly designed to replicate auditory cortical tuning seen experimentally in spectrotemporal receptive fields [45]. For instance, the filters are logarithmically spaced, consistent with neurophysiological [103] and psychophysical [104,105] observations, and tuned to both spectral and temporal modulation. It is thus expected that the baseline model would be able to predict cortical responses to some extent, particularly in primary auditory cortex [56,57], and indeed, its predictions were much better than those of the permuted models. The fact that task-optimized models tend to produce better matches to the cortex than the baseline model thus seems nontrivial.

Another difference between the tested DNN models and the baseline SpectroTemporal model is the number of stages: The DNN models have multiple stages, while the baseline model has a single stage intended to model the auditory cortex. The multiple stages in DNN

models require choosing which model stages contribute to model predictions. In principle, all stages of a DNN model could be used concurrently to model the brain response of interest. Instead, our model comparisons used the best-predicting model stage (selected using data distinct from that used to measure the explained variance or RDM similarity). Although this allows an additional hyperparameter when fitting multistage models, this analysis choice could be argued to disadvantage multistage models—if there was no correspondence between model stages and brain regions, or if the correspondence was sufficiently poor, better predictions might result by using features combined across multiple stages. We also found that the DNN models with permuted weights in all cases produced worse matches to the cortex than the single-stage baseline model, providing further evidence that the analysis procedure does not intrinsically favor multistage models. These observations again suggest that the better-than-baseline matches of task-optimized DNN models to the cortex are nontrivial.

The poor performance of some of the models built for engineering purposes suggests a cautionary note. Training neural network models at scale requires substantial compute resources and expertise, and it is thus tempting to obtain models that have been developed in industry labs for other purposes and attempt to use them as models of the brain [41,42,106]. Our results suggest that one should not assume that such a model will necessarily produce good brain predictions. In particular, the 3 speech recognition models (S2T, Wav2Vec2, and DeepSpeech2) all produced worse predictions than all of our main in-house models (Fig 2). This result is also consistent with the fact that speech recognition systems derived in engineering contexts do not reproduce some characteristics of human speech perception [76,77]. These model shortcomings could relate to these models having been trained on clean speech (as is common for such systems given that they are typically combined with separate denoising systems)—when we explicitly manipulated background noise during training, we found that training without noise caused the in-house models to produce worse brain predictions. The inclusion of an initial cochlear stage may also help to produce representations and behavior like those of biological auditory systems [32], though we did not manipulate that here.

### Relation to prior work

The best-known prior study along these lines is that of Kell and colleagues [31], and the results here qualitatively replicate the key results of that study. One contribution of the present study thus lies in showing that these earlier results hold for many different auditory models. In particular, most trained models produce better predictions than the SpectroTemporal baseline model, and most exhibit a correspondence between model stages and brain regions. The consistently worse predictions obtained from models with random/permuted weights also replicates prior work, providing more evidence that optimizing representations for tasks tends to bring them in closer alignment with biological sensory systems. We also extended the approach of Kell and colleagues [31] by substantiating these main conclusions using representational similarity analyses in addition to regression-based predictions, providing converging evidence for model-brain matches. Overall, the results indicate a qualitatively similar set of results to those obtained in the ventral visual pathway, where many different trained models produce overall good predictions [64].

The study of Kell and colleagues [31] used a model trained on 2 tasks but did not test the extent to which the multiple tasks improved the overall match to human brain responses. Here, we compared model-brain similarity for models trained on single tasks and models trained on multiple tasks and saw advantages for multiple tasks. We note that it is not always straightforward to train models to perform multiple tasks and indeed that Kell and colleagues [31] found that task performance was optimized when the representations subserving the 2

tasks were partially segregated. This representational segregation could potentially interact with the extent to which the model representations match to human brain responses. But for the tasks we considered here, it was not necessary to explicitly force representational segregation in order to achieve good task performance or good predictions of human brain responses.

Beyond the study by Kell and colleagues [31], there have been relatively few other efforts to compare neural network models to auditory cortical responses. One study compared representational similarity of fMRI responses to music to the responses of a neural network trained on music annotations but did not compare to standard baseline models of auditory cortex [36]. Another study optimized a network for a small-scale (10-digit) word recognition task and reported seeing some neurophysiological properties of the auditory system [38]. Koumura and colleagues [37,107] trained networks on environmental sound or speech classification and observed tuning to amplitude modulation, similar to that found in peripheral and mid-level stages of biological auditory systems but did not investigate the putative hierarchy of cortical regions. Giordano and colleagues [44] found that 3 DNN models predicted non-primary voxel responses better than standard acoustic features, generally consistent with the results shown here. Millet and colleagues [41] used a self-supervised speech model to predict brain responses to naturalistic speech and found a stage-region correspondence similar to that found by Kell and colleagues [31] and in the present work. However, they used a model that we found to produce poor predictivity compared to others that we tested, and the overall variance explained was relatively low. Similarly, Vaidya and colleagues [42] demonstrated that certain self-supervised speech models capture distinct stages of speech processing. Our results complement these findings in showing that they apply to a large set of models and to responses to natural sounds more generally.

### Limitations of our approach and results

The analyses presented here are intrinsically limited by the coarseness of fMRI data in space and time. Voxels contain many thousands of neurons, and the slow time constant of the BOLD signal averages the underlying neuronal responses on a timescale of several seconds. It remains possible that responses of single neurons would be harder to relate to the responses of the sorts of models tested here, particularly when temporal dynamics are examined. Our analyses are also limited by the number of stimuli that can feasibly be presented in an fMRI experiment (less than 200 given our current methods and reliability standards). It is possible that larger stimulus sets would better differentiate the models we tested.

The conclusions here are also limited by the 2 metrics of model-brain similarity that we used. The regression-based metric of explained variance is based on the assumption that representational similarity can be meaningfully assessed using a linear mapping between responses to natural stimuli [46,108,109]. This assumption is common in systems neuroscience but could obscure aspects of a model representation that deviate markedly from those of the brain, because the linear mapping picks out only the model features that are predictive of brain responses. There is ample evidence that DNN models tend to rely partially on different features than humans [18,19] and have partially distinct invariances [25,27] for reasons that remain unclear. Encoding model analyses may mask the presence of such discrepant model properties. They also leave open the possibility that the features that are picked out by the linear mapping are not the same as those in the brain—they only need to be correlated with the brain features to produce good brain predictions on a finite dataset [57,65]. We note that accurate predictions of brain responses may be useful in a variety of applied contexts and so have value independent of the extent to which they capture intuitive notions of similarity. In addition, accurate predictive models might be scientifically useful in helping to better understand what

is represented in a brain response (for instance, by generating predictions of stimuli that yield high or low responses that can then be tested experimentally [110]). But there are nonetheless limitations when relying exclusively on regression to evaluate whether a model replicates brain representations.

Representational dissimilarity matrices complement regression-based metrics but have their own limitations. RDMs are computed from the entirety of a representation, and so reflect all of its dimensions, but conversely are not invariant to linear transformations. Scaling some dimensions up and others down can alter an RDM even if it does not alter the information that can be extracted from the underlying representation. Further, RDMs rely on choosing a distance measure between model responses to construct the RDM and a distance measure between 2 RDMs, and the most commonly used measures do not obey formal properties of metric spaces [111]. Although the RDM comparisons we employ are in widespread use, the measurement of representational similarity is an active area of research, with alternative metrics under development [111]. Moreover, RDMs must be computed from sets of voxel responses and so are sensitive to the (potentially ad hoc) choice of which voxels to pool together. For instance, our first analysis (Fig 2) pooled voxels across all of auditory cortex, and this may have limited the similarity observed with individual model stages (potentially explaining why the DNN models show only a modest advantage over the baseline model via this metric). By contrast, regression metrics can be evaluated on individual voxels.

The fact that the regression and RDM analyses yielded similar qualitative conclusions is reassuring, but they are but 2 of a large space of possible model-brain similarity metrics [57,111–113]. In addition, the correspondence between the 2 metrics was not perfect. The correlation between overall variance explained (the regression metric) and the human-model RDM similarity across network stages was  $R^2 = 0.56$  and  $0.58$  for NH2015 and B2021, respectively—much higher than chance but below the noise ceiling for the 2 measures (S10 Fig). In addition, the best model stages for each ROI were generally only weakly correlated between the 2 metrics (Fig 7). These discrepancies are not well understood at present but must eventually be resolved for the modeling enterprise to declare success.

Although we found consistent evidence for correspondence between model stages and brain regions, this correspondence was coarse: The best-predicting model stages tended to be later for non-primary voxels than for primary voxels. There is at present no evidence for anything more fine-grained (for instance, with each stage of a model mapping onto a distinct stage of the auditory system). The evaluation of a more fine-grained correspondence is limited in part by fMRI data. For instance, the cortex is composed of distinct layers of neurons that might be expected to map onto distinct stages of an artificial neural network, but our fMRI data do not resolve layers within a cortical column. The many subcortical stages of auditory processing might be expected to be captured by early model stages (as would be consistent with the relatively late position of the best-predicting stages for cortical voxels) but are difficult to measure as reliably as is needed for the model comparisons used here. The position of the best-predicting stage also varied a fair bit across models. We do not find this surprising given the diversity of tasks on which the models were trained, and the diversity of model architectures, but we also lack a theory at present for why the best-predicting stages are in particular places for particular models.

Another limitation is that we did not evaluate the behavior of the models we tested. In other work, we have found that models trained to perform natural tasks on natural stimuli tend to reproduce a fairly wide range of human psychophysical results [31–33], but we did not conduct such experiments on the present set of models, in part because we currently lack psychophysical batteries for some of the training tasks (specifically, speaker and audio event recognition). It is thus possible that the models learn to perform the training tasks differently

than humans despite using features that enable above-baseline predictions of brain responses [23,25,27,57,114].

As discussed above, our study is unable to disentangle effects of model architecture, task, and training data on the brain predictions of the external models tested. We emphasize that this was not our goal—we sought to test a wide range of models as a strong test of the generality of brain-DNN similarities, cognizant that this would limit our ability to assess the reasons for model-brain discrepancies. The in-house models nonetheless help reveal some of the factors that drive differences in model predictions.

## Future directions

The finding that task-optimized neural networks generally enable improved predictions of auditory cortical brain responses motivates a broader examination of such models, as well as further model development for this purpose. For instance, the finding that different tasks best predict different brain responses suggest that models that both recognize and produce speech might help to explain differences in “ventral” and “dorsal” speech pathways [115], particularly if paired with branching architectures [31] that can be viewed as hypotheses for distinct functional pathways. Models trained to localize sounds [33] in addition to recognizing them might help explain aspects of the cortical encoding of sound location and its possible segregation from representations of sound identity [97,116–120]. Task-optimized models could potentially also help clarify findings that currently do not have an obvious functional interpretation, for instance, the tendency for responses to broadband onsets to be anatomically segregated from responses to sustained and tonal sounds [50,121,122], if such response properties emerge for some tasks and not others.

On the other hand, it remains unclear whether improvements in tasks and training datasets can entirely bridge the substantial remaining gaps between current neural network models and the brain. In principle, current model failures (aberrant behaviors such as adversarial examples and discrepant metamers, along with sub-ceiling model-brain similarity according to many metrics) might be explained simply by differences in the training task or training data relative to those that biological organisms are plausibly optimized for [123]. For instance, models are often optimized for a single task, and on data that is arguably more stereotyped (for instance, with images centered on single objects [124,125]) than the sensory data encountered by organisms in the world, and this might be expected to limit the match to human behavior, with improvements to be expected as tasks and data are made richer. Our results from training in noise and the multitask networks are consistent with this general idea. However, it also remains possible that because biological sensory systems result from complex evolutionary histories, they might not be well approximated by the result of a single optimization procedure for a fixed set of training objectives [30], which might limit the extent to which pure task optimization is likely to account for biological perception.

One can also question the role of tasks in the optimization that produces biological perceptual systems. As is widely noted, the learning algorithm used in most of the models we considered (supervised learning) is not a plausible account for how biological organisms incorporate data from their environment [126]. The use of supervised learning is motivated by the possibility that one could converge on an accurate model of the brain’s representations by replicating some constraints that shape neural representations even if the way those constraints are imposed deviates from biology. It is nonetheless conceivable (and perhaps likely) that fully accurate models will require learning algorithms that more closely resemble the optimization processes of biology, in which nested loops of evolutionary selection and (largely unsupervised) learning over development combine to produce systems that can perform a wide range

of tasks well and thus successfully pass on their genes. Some initial steps in this direction can be found in recent models that are optimized without labeled training data [41,42,127,128]. Our model set contained one such contrastive self-supervised model (Wav2Vec2 [129]), and although its brain predictions were worse than those of most of the supervised models, this direction clearly merits extensive exploration.

It will also be important to use additional means of model evaluation, such as model-matched stimuli [25,27,57], stimuli optimized for a model's predicted response [110,130–132], methods that directly substitute brain responses into models [112], or recently proposed alternative methods to measure representational similarity [111]. These additional types of evaluations could help address some of the limitations discussed in the previous section. And, ultimately, analyses such as these need to be related to more fine-grained anatomy and brain response measurements. Model-based analyses of human intracranial data [43,133] and single-neuron responses from nonhuman animals both seem like promising next steps in the pursuit of complete models of biological auditory systems.

## Methods

### Voxel response modeling

The following voxel encoding model methods are adapted from those of Kell and colleagues [31], and where the methods are identical, we have reproduced the analogous sections of the methods verbatim. We summarize the minor differences from the methods of Kell and colleagues [31] at the end of this section. All voxel response modeling and analysis code was written in Python (version 3.6.10), making heavy use of the numpy [134] (version 1.19.0), scipy [135] (version 1.4.1), and scikit-learn [136] libraries (version 0.24.1).

**General.** We performed an encoding analysis in which each voxel's time-averaged activity was predicted by a regularized linear model of the DNN activity. We operationalized each model stage within each candidate model (see section "Candidate models") as a hypothesis of a neural implementation of auditory processing. The fMRI hemodynamic signal to which we were comparing the candidate model blurs the temporal variation of the cortical response, thus a fair comparison of the model to the fMRI data involved predicting each voxel's time-averaged response to each sound from time-averaged model responses. We therefore averaged the model responses over the temporal dimension after extraction. Because it seemed possible that units with real-valued activations might average out to near-zero values, we extracted unit activations after model stages that transform the output to positive values (ReLU, Tanh stages). Transformer architectures had no such stages, so we extracted the real-valued unit activations and analyzed all model stages in this way. Pilot analyses suggested that voxel predictions from these models were similar when we time-averaged unit activations that were exclusively positive (specifically, when we used the root mean square (RMS) instead of the mean).

**Voxelwise modeling: Regularized linear regression and cross-validation.** We modeled each voxel's time-averaged response as a linear combination of a model stage's time-averaged unit responses. We first generated 10 randomly selected train/test splits of the 165 sound stimuli into 83 training sounds and 82 testing sounds. For each split, we estimated a linear map from model units to voxels on the 83 training stimuli and evaluated the quality of the prediction using the remaining 82 testing sounds (described below in greater detail). For each voxel-stage pair, we took the median across the 10 splits. The linear map was estimated using regularized linear regression. Given that the number of regressors (i.e., time-averaged model units) typically exceeded the number of sounds used for estimation [83], regularization was critical. We used L2-regularized ("ridge") regression, which can be seen as placing a zero-mean

Gaussian prior on the regression coefficients. Introducing the L2-penalty on the weights results in a closed-form solution to the regression problem, which is similar to the ordinary least-squares regression normal equation:

$$\mathbf{w} = (\mathbf{X}^T \mathbf{X} + n\lambda \mathbf{I})^{-1} \mathbf{X}^T \mathbf{y}$$

where  $\mathbf{w}$  is a  $d$ -length column vector (the number of regressors—i.e., the number of time-averaged units for the given stage),  $\mathbf{y}$  is an  $n$ -length column vector containing the voxel's mean response to each sound (length 83),  $\mathbf{X}$  is a matrix of regressors ( $n$  stimuli by  $d$  regressors),  $n$  is the number of stimuli used for estimation [83], and  $\mathbf{I}$  is the identity matrix ( $d$  by  $d$ ). We demeaned each column of the regressor matrix (i.e., each model unit's response to each sound), but we did not normalize the columns to have unit norm. Similarly, we demeaned the target vector (i.e., the voxel's or the component's response to each sound). By not constraining the norm of each column to be one, we implemented ridge regression with a non-isotropic prior on each unit's learned coefficient. Under such a prior, units with larger norm were expected a priori to contribute more to the voxel predictions. In pilot experiments, we found that this procedure led to more accurate and stable predictions in left-out data, compared with a procedure where the columns of the regressor matrices were normalized (i.e., with an isotropic prior). The demeaning was performed on the train set, and the same transformation was applied on the test set. This ensured independence (no data leakage) between the train and test sets.

Performing ridge regression requires selecting a regularization parameter that trades off between the fit to the (training) data and the penalty for weights with high coefficients. To select this regularization parameter, we used leave-one-out cross-validation within the set of 83 training sounds. Specifically, for each of 100 logarithmically spaced regularization parameter values ( $1e-50$ ,  $1e-49$ , ...,  $1e48$ ,  $1e49$ ), we measured the squared error in the resulting prediction of the left-out sound using regression weights derived from the other sounds in the training split. We computed the average of this error (across the 83 training sounds) for each of the 100 potential regularization parameter values. We then selected the regularization parameter that minimized this mean squared error. Finally, with the regularization parameter selected, we used all 83 training sounds to estimate a single linear mapping from a stage's features to a given voxel's response. We then used this linear mapping to predict the response to the left-out 82 test sounds and evaluated the Pearson correlation of the predicted voxel response with the observed voxel response. If the predicted voxel response had a standard deviation of exactly 0 (no variance of the prediction across test sounds), the Pearson correlation coefficient was set to 0. Similarly, if the Pearson correlation coefficient was negative, indicating that the held-out test sounds were not meaningfully predicted by the linear map from the training set, the Pearson correlation value was similarly set to 0. We squared this Pearson correlation coefficient to yield a measure of variance explained. We found that the selected regularization parameter values rarely fell on the boundaries of the search grid, suggesting that the range of the search grid was appropriate. We emphasize that the 82 test sounds on which predictions were ultimately evaluated were not incorporated into the procedure for selecting the regularization parameter nor for estimating the linear mapping from stage features to a voxel's response—i.e., the procedure was fully cross-validated.

Selecting regularization coefficients independently for each voxel-stage regression was computationally expensive but seemed important for our scientific goals given that the optimal regularization parameter could vary across voxel-stage pairs. For instance, differences in the extent to which the singular value spectrum of the feature matrix is uniform or peaked (which influences the extent to which the  $\mathbf{X}^T \mathbf{X} + n\lambda \mathbf{I}$  matrix in the normal equation above is well



conditioned) can lead to differences in the optimal amount of regularization. Measurement noise, which varies across voxels, can also influence the degree of optimal regularization. By allowing different feature sets (stages) to have different regularization parameters, we are enabling each feature set to make the best possible predictions, which is appealing given that the prediction quality is the critical dependent variable that we compare across voxels and stages. Varying the regularization parameter across feature sets while predicting the same voxel response will alter the statistics of the regression coefficients across feature sets and thus would complicate the analysis and interpretation of regression coefficients. However, we are not analyzing the regression coefficients in this work.

**Voxelwise modeling: Correcting for reliability of the measured voxel response.** The use of explained variance as a metric for model evaluation is inevitably limited by measurement noise. To correct for the effects of measurement noise, we computed the reliability of both the measured voxel response and the predicted voxel response. Correcting for the reliability of the measured response is important to make comparisons across different voxels, because (as shown in, for instance, Figure S2 in Kell and colleagues' article [31]) the reliability of the BOLD response varies across voxels. This variation can occur for a variety of reasons (for instance, distance from the head coil elements). Not correcting for the reliability of the measured response will downwardly bias the estimates of variance explained and will do so differentially across voxels. This differential downward bias could lead to incorrect inferences about how well a given set of model features explains the response of voxels in different parts of auditory cortex.

**Voxelwise modeling: Correcting for reliability of the predicted voxel response.** Measurement noise corrupts the test data to which model predictions are compared (which we accounted for by correcting for the reliability of the measured voxel response, as described above), but noise is also present in the training data and thus also inevitably corrupts the estimates of the regression weights mapping from model features to a given voxel. This second influence of measurement noise is often overlooked but can be addressed by correcting for the reliability of the predicted response. Doing so is important for 2 reasons. First, as with the reliability of the measured voxel response, not correcting for the predicted voxel response can yield incorrect inferences about how well a model explains different voxels. Second, the reliability of the predicted response for a given voxel can vary across feature sets, and failing to account for these differences can lead to incorrect inferences about which set of features best explains that voxel's response. It was thus, in practice, important to correct for the reliability of the predicted voxel response. By correcting for both the reliability of the measured voxel response and the reliability of the predicted response, the ceiling of our measured r-squared values was 1 for all voxels and all stages, enabling comparisons of voxel predictions across all voxels and all neural network stages.

**Voxelwise modeling: Corrected measure of variance explained.** To correct for the reliability, we employ the correction for attenuation [61]. It is a standard technique in many fields and is becoming more common in neuroscience. The correction estimates the correlation between 2 variables independent of measurement noise (here the measured voxel response and the model prediction of that response). The result is an unbiased estimator of the correlation coefficient that would be observed from noiseless data. Our corrected measure of variance explained was the following:

$$r_{v,\hat{v}}^{2*} = \frac{r(\mathbf{v}_{123}, \hat{\mathbf{v}}_{123})^2}{r_v' r_{\hat{v}}'}$$

where  $\mathbf{v}_{123}$  is the voxel response to the 82 left-out sounds averaged over the 3 scans,  $\hat{\mathbf{v}}_{123}$  is the

predicted response to the 82 left-out sounds (with regression weights learned from the other 83 sounds),  $r$  is a function that computes the correlation coefficient,  $r'_v$  is the estimated reliability of that voxel's response to the 83 sounds, and  $r'_v$  is the estimated reliability of that predicted voxel's response.  $r'_v$  is the median of the correlation between all 3 pairs of scans (scan 0 with scan 1; scan 1 with scan 2; and scan 0 with scan 2), which is then Spearman–Brown corrected to account for the increased reliability that would be expected from tripling the amount of data [61].  $r'_v$  is analogously computed by taking the median of the correlations for all pairs of predicted responses (models fitted on a single scan) and Spearman–Brown correcting this measure. Note that for very noisy voxels, this division by the estimated reliability can be unstable and can cause for corrected variance explained measures that exceed one. To ameliorate this problem, we limited both the reliability of the prediction and the reliability of the voxel response to be greater than some value  $k$  [58]. For  $k = 1$ , the denominator would be constrained to always equal 1, and, thus, the “corrected” variance explained measure would be identical to uncorrected value. For  $k = 0$ , the corrected estimated variance explained measure is unaffected by the value  $k$ . This  $k$ -correction can be seen through the lens of a bias-variance trade-off: This correction reduces the amount of variance in the estimate of variance explained across different splits of stimuli but does it at the expense of a downward bias of those variance explained metrics (by inflating the reliability measure for unreliable voxels). For  $r'_v$ , we used a  $k$  of 0.182, which is the  $p < 0.05$  significance threshold for the correlation of two 83-dimensional Gaussian variables (i.e., with the same length as our 83-dimensional voxel response vectors used as the training set), while for  $r'_v$ , we used a  $k$  of 0.183, which is the  $p < 0.05$  significance threshold for the correlation of two 82-dimensional Gaussian variables (i.e., same length as our 82-dimensional predicted voxel response vectors, the test set).

**Voxelwise modeling: Summary.** We repeated this procedure for each stage and voxel 10 times, once each for 10 random train/test splits, and took the median explained variance across the 10 splits for a given stage-voxel pair. We performed this procedure for all stages of all candidate models and all voxels (across 2 datasets: NH2015: 7,694 voxels, B2021: 26,792 voxels). Thus, for each stage and voxel, this resulted in 10 explained variance values ( $R^2$ ). We computed the median explained variance across these 10 cross-validation splits for each voxel-stage pair. For comparison, we performed an identical procedure with the stages of a permuted network with the same architecture as our main networks (see section “Candidate models with permuted weights”) and the SpectroTemporal baseline model. In all analyses, if a noise-corrected median explained variance value exceeded 1, we set the value to 1 to avoid an inflation of the explained variance.

In summary, the voxel prediction methods were largely the same as those in Kell and colleagues' article [31], with the following differences. First, we imposed a different range of regularization constants to avoid hitting the bounds of the range. This difference was necessitated to accommodate a larger and more diverse set of models than in Kell and colleagues' article [31] as well as changes to scikit learn in the years separating our study from that of Kell and colleagues [31]. Second, we set the  $r$ -squared values for negative  $r$  values to 0, rather than using signed  $r$ -squared values as in Kell and colleagues' article [31]. This seemed like the best choice given that negative  $r$  values indicates that a model cannot predict the data. Third, we used a different limit for the reliability used to correct the explained variance. Our limit was the minimum correlation that would be statistically significant for a sample size of 82 and 83 (which is the sample size for which the reliability is measured), whereas Kell and colleagues [31] assumed a sample size of 165. Fourth, we omitted the Fisher  $z$  transform when averaging  $r$ -squared values, as it seemed hard to motivate. We strongly suspect that none of these differences qualitatively affect any important result, but we list them here for transparency.

**Voxelwise predictions across models [Fig 2].** To compare how well each candidate model explained the variance in the fMRI data, we aggregated the explained variance across all voxels in the dataset of interest (NH2015: 7,694 voxels, B2021: 26,792 voxels) for each model. We evaluated each candidate model using its best-predicting stage. Selection of the best-predicting model stage was performed in one of 2 ways. In the main analysis featured in Fig 2, for each voxel, we used half of the 10 cross-validation test splits to select the best-predicting stage and the remaining 5 test splits to obtain the median explained variance. This yielded a median explained variance per voxel. To ensure that this procedure did not depend on the random 5 cross-validation splits selected, we repeated this procedure 10 times for each model. We then obtained the mean of the explained variance values for each voxel across these 10 iterations. To mitigate concerns that this analysis might be affected by the overlap in sounds in the 5 splits used to select the best stage and the 5 splits used to measure the explained variance, we performed a second analysis in which we selected the best-predicting model stage using all the voxels for all but one participant and then measured the explained variance in each of the voxels in the left-out participant. This analysis measures explained variance with data fully independent from that used to choose the best stage but is less consistent with the rest of the analyses (for instance, the maps of the best-predicting model stage, in which it was critical to choose the best-predicting stage separately for each voxel). We confirmed that the results shown in Fig 2 were qualitatively similar if this second procedure was used to choose the best-predicting stage for each model. To obtain an aggregated explained variance across voxels for each model, we first obtained the median across voxels within each participant and then took the mean across participants. An identical procedure was used for the permuted networks.

**Voxelwise predictions across model stages [S2 Fig].** To visualize how well each stage of each candidate model explained variance in the fMRI data, we aggregated the explained variance across all voxels in the dataset of interest (NH2015: 7,694 voxels, B2021: 26,792 voxels) for each model. Given that no model stage selection procedure took place, we simply obtained the median across voxels within each participant and then took the mean across participants for each model stage, identical to the aggregation procedure for the best-stage voxelwise predictions (Fig 2).

**Best-predicting model stage [Fig 6/ Fig 7].** We also examined which model stage best predicted each voxel's response (an "argmax" analysis, i.e., the position that best predicts the response for each voxel). We assigned each model stage a position index between 0 and 1 (using minmax normalization such that the first stage was assigned a value of 0 and the last stage a value of 1, i.e.,  $(\text{current\_stage} - \text{min\_stage}) / (\text{num\_stages} - \text{min\_stage})$ ). For summary maps (Fig 6), we predicted responses in individuals and then aggregated results across participants (median), after they were aligned in a common coordinate system (i.e., the FsAverage surface from FreeSurfer) using K-Nearest Neighbor interpolation. For the across-model summary map, we took the median of the best model stage positions across the  $n = 15$  best-performing models (rounded to the first decimal place). The plots were visualized using Freeview using default parameters (Freeview version 7.3.2). The color overlay was an inverse color wheel. The color scale limits were set to extend from 0 to the stage beyond the most common best stage (across voxels in both fMRI datasets). The permuted control networks were visualized using an identical color scale to the trained networks.

To quantify these summary maps, we compared the best-predicting model stage within different regions of the auditory cortex (Fig 7). We used 4 anatomical ROIs: one for primary auditory cortex along with 3 ROIs for posterior, lateral, and anterior non-primary auditory cortex. These ROIs were combinations of subsets of ROIs in the Glasser [67] parcellation. We note that they were taken directly from a previous publication [51] where they were intended to capture the auditory cortical regions exhibiting reliable responses to natural sounds and

were not adapted in any way to the present analysis. For each model, we computed the relative model stage position of the best-predicting stage within each ROI (an “argmax” analysis, as shown on the summary maps; Fig 6), which we summarized by taking the median across voxels within each ROI for each participant followed by the mean across participants (similar to the aggregation procedure in Fig 2). This yielded an average relative best model stage position per candidate model within each ROI. An identical procedure was used for the permuted networks.

### Component modeling

We complemented the voxelwise modeling with analogous predictions of components of the fMRI response derived from all of the voxels. In previous work [50], we found that voxel responses to natural sounds can be explained as a linear combination of 6 response components (Fig 3A). The components are derived from the auditory cortical voxels (pooled across participants) that exceed a criterion of reliability. Each component is defined by a response to each of the sounds in the stimulus set and has a weight for each voxel in the pool.

We predicted the responses for each of these 6 components in a manner similar to the voxelwise modeling. The only difference was that we did not perform any noise-ceiling correction for the components (the components do not have repetitions across scan sessions, unlike the voxel responses). Thus, all component predictions reported are the “raw” explained variance (squared Pearson correlation coefficient).

**Component predictions across models [Figs 5 and 9].** To compare how well each candidate model explained the component responses, we selected the best-predicting model stage for each candidate model using independent data (identical to the procedure described in “Voxelwise predictions across models” for the voxel data).

**Component predictions across sounds [Fig 4].** We visualized the component response predictions by plotting them against the actual responses (derived from Norman-Haignere and colleagues’ article [50]) for each sound. We did this for the best-predicting model stage of the CochResNet50-MultiTask (best-performing model overall; Fig 2A) for each component. The best-predicting model stage was selected across 10 iterations of the independent model stage selection procedure, as described in section “Voxelwise predictions across models.” For each of the 10 iterations, we used the median explained variance value of 5 random cross-validation test splits to identify the best model stage. Thus, 10 iterations of this procedure yielded 10 best-predicting model stages. For each component, we selected the most frequently occurring best-predicting model stage as the stage with which to visualize a given component’s predictions. Given a component and model stage, we obtained the predicted component response for a sound by taking the mean over all cross-validation splits in which that sound was included in the test set. In that way, we obtained the average prediction for each sound and each component. We note that the predicted component responses visualized in Fig 4 were demeaned during the regression procedure (using the training set mean to demean the test set, ensuring no data leakage between train/test sets; see section “Voxelwise modeling: Regularized linear regression and cross-validation”), but the predicted responses were transformed back to their original scale (by adding back their mean) for visualization in Fig 4 (ordinate values). The actual component responses in Fig 4 were taken directly from Norman-Haignere and colleagues’ article [50] without any transformations (abscissa values).

### Representational similarity analysis

To assess the robustness of our conclusions to the evaluation metric, we also investigated the similarity of model and fMRI responses using representational similarity analysis (RSA)

[47,63,64]. We used the same set of model stages and time-averaged representations as were used in the regression-based voxelwise modeling analysis. To construct the model representational dissimilarity matrix (RDM) for each model and model stage, we computed the dissimilarity (1 minus the Pearson correlation coefficient) between the model activations evoked by each pair of sounds. Similarly, to construct the fMRI RDM, we computed the dissimilarity in voxel responses (1 minus the Pearson correlation coefficient) between all voxel responses from a participant to each pair of sounds. Before computing the RDMs from the fMRI or model responses, we z-scored the voxel or unit responses. As a measure of fMRI and model similarity, we computed the Spearman rank ordered correlation coefficient between the fMRI RDM and the model RDM.

**Representational similarity analysis: Across model comparison.** In the analysis shown in Fig 2, we compared the RDMs computed across all voxels of a participant to the RDM computed from the time-averaged unit responses of each stage of each model. To choose the best-matching stage, we first generated 10 randomly selected train/test splits of the 165 sound stimuli into 83 training sounds and 82 testing sounds. For each split, we computed the RDMs for each model stage and for each participant's fMRI data for the 83 training sounds. We then chose the model stage that yielded the highest Spearman  $\rho$  measured between the model stage RDM and the participant's fMRI RDM. Using this model stage, we measured the model and fMRI RDMs from the test sounds and computed the Spearman  $\rho$ . We repeated this procedure 10 times, once each for 10 random train/test splits, and took the median Spearman  $\rho$  across the 10 splits. We performed this procedure for all candidate models and all participants (across 2 datasets: NH2015: 8 participants, B2021: 20 participants) and computed the mean Spearman  $\rho$  across participants for each model. For comparison, we performed an identical procedure with permuted versions of each neural network model and with the SpectroTemporal baseline model.

**Representational similarity analysis: Noise ceiling.** The representational similarity analysis is limited by measurement noise in the fMRI data. As an estimate of the RDM correlation that could be reasonably expected to be achieved between a model RDM and a single participant's fMRI RDM, we calculated the correlation between one participant's RDM and the average of all the other participant's RDM. Within each dataset (NH2015 and B2021), we held out one participant and averaged the RDMs across the remaining participants. The RDMs were measured from the same 10 train/test splits of the 165 sounds described in the previous section, using the 82 test sounds for each split. We then calculated the Spearman  $\rho$  between the RDM from the held-out participant and the average participant RDM. We took the median Spearman  $\rho$  across the 10 splits of data to yield a single value for each participant. This procedure was repeated holding out each participant, and the noise ceiling shown in Figs 2E, 2G, and 8B is the mean across the measured value for each held-out participant. This corresponds to the "lower bound" of the noise ceiling used in prior work [63]. We plotted the noise ceiling on the results graphs rather than noise-correcting the human-model RDM correlation to be consistent with prior modeling papers that have used this analysis [63,64].

**Representational similarity analysis: Best model stage analysis.** We also examined which model stage best captured the RDM measured from each anatomical ROI (an "argmax" analysis). We assigned each model stage a position index between 0 and 1 (minmax normalization like in the regression-based analyses). Given that we only report the "argmax" for this analysis (and not the measured values), we used the full set of 165 sounds to compute the RDMs. For a given ROI, we measured each participant's fMRI RDM computed on the voxels within the ROI. For each model, we computed the RDM for each stage and measured the Spearman  $\rho$  between the model-stage RDM and the fMRI ROI RDM. We measured the argmax across the stages for each model and each participant. We then took the mean of this

position index across participants to yield an average relative best model stage per candidate model within each ROI. An identical procedure was used for the permuted networks.

**Representational similarity analysis: Visualization.** For fMRI RDMs, we computed the RDM individually for each participant and then averaged the RDM for visualization. Both fMRI and model RDMs are grouped and colored by the sound categories assigned in Norman-Haignere and colleagues' article [50]. fMRI RDMs for all auditory cortex voxels and for each ROI can be found in [S1 Fig](#).

### Effective dimensionality

We investigated the effective dimensionality (ED) of the representations at each model stage as well as of the measured fMRI activity. The ED [137] was calculated on the set of 165 sounds that were used for the brain comparisons. The ED was evaluated as:

$$ED = \frac{(\sum_i \lambda_i)^2}{\sum_i \lambda_i^2}$$

where  $\lambda_i$  are the square of the singular values obtained from the matrix of <activations> by <sounds>. This matrix was measured from the fMRI or model activations that were used for the regression analysis (demeaning each voxel or unit response) or for the RSA analysis (z-scoring the voxel or unit responses). In practice, these 2 different forms of preprocessing altered the ED measure, with ED values being about twice as large following the RSA preprocessing compared to the regression preprocessing. For instance, the ED for the fMRI data was 8.75 (for NH2015) and 5.32 (for B2021) using the regression preprocessing, but 16.9 (NH2015) and 12.9 (B2021) when using the representational similarity preprocessing. We used the 2 types of preprocessing to maintain consistency with the 2 types of model-brain similarity analysis, but the conclusions of the ED analysis would not have been qualitatively different had we exclusively used one type of preprocessing or the other.

### Statistical analysis

**Voxel responses: Pairwise model comparisons (regression and representational similarity).** For statistical comparison of brain predictions between models trained with and without background noise, we evaluated significance nonparametrically by bootstrapping across participants ( $n = 8$  for NH2015,  $n = 20$  for B2021). For each model trained without background noise, we sampled the participant explained variance values with replacement (8 or 20 values, sampled 10,000 times) and took the average. The resulting histogram was compared to the noise-trained model's observed value averaged across all participants. The  $p$ -value was obtained by counting the number of times the bootstrapped value was smaller than the observed value, divided by the number of bootstrap iterations ( $n = 10,000$ ). The test was one-tailed because it was motivated by the hypothesis that the model trained in background noise would produce better fMRI response predictions than the models trained without background noise.

**Comparisons of best predicting model stages between ROIs (regression and representational similarity).** For statistical comparison of the mean model stage position index for pairs of anatomical ROIs (related to [Fig 7](#)), we performed a Wilcoxon signed rank test. The test compared the average values across models obtained from the primary ROI versus the average values obtained from the non-primary ROI across models. The test was two-tailed. In exploratory analyses of best predicting model stages among the 3 non-primary ROIs, we performed a Bonferroni correction for multiple comparisons due to the lack of a priori hypotheses.

**Component responses: Pairwise model comparisons (regression).** For statistical comparison of component predictions between pairs of models (related to Figs 5 and 9), we evaluated significance nonparametrically via a permutation test. Based on the model stage selection procedure described in section “Component predictions across models,” we obtained 10 independently selected median explained variance values per component. For a given component, we took the average across the 10 explained variance values for each model and then computed the difference between the 2 models. We generated a null distribution by randomly permuting the model assignment and measuring the difference between the averages of these permuted model assignment lists. The  $p$ -value was obtained by counting the number of times the observed difference was smaller than the values measured from permuted data, divided by the number of permutations ( $n = 10,000$ ). The test was one-tailed because in each case, it was motivated by a hypothesis that one model would produce better component response predictions than the other. Specifically, there were 2 types of comparisons. In the first, the trained models were compared to the SpectroTemporal baseline model. In the second, models trained on a task that was plausibly related to the selectivity of a component (for instance, the word task for the speech component) were compared to models trained on a task not obviously related to that component (for instance, the genre task for the speech component).

### fMRI data (NH2015)

The initial sections of the fMRI data collection methods used in Norman-Haignere and colleagues’ article [50] are very similar to the methods reported in Kell and colleagues’ article [31] and the text is replicated with minor edits.

**fMRI cortical responses to natural sounds.** The fMRI data analyzed here is a subset of the data in Norman-Haignere and colleagues’ article [50], only including the participants who completed 3 scanning sessions. Eight participants (4 female, mean age: 22 years, range: 19 to 25; all right-handed) completed 3 scanning sessions (each approximately 2 hours). Participants were non-musicians (no formal training in the 5 years preceding the scan), native English speakers, and had self-reported normal hearing. Two other participants only completed 2 scans and were excluded from these analyses, and 3 additional participants were excluded due to excessive head motion or inconsistent task performance. The decision to exclude these 5 participants was made before analyzing any of their fMRI data. All participants provided informed consent, and the Massachusetts Institute of Technology Committee on the Use of Humans as Experimental participants approved experiments (protocol number 2105000382).

**Natural sound stimuli.** The stimuli were a set of 165 two-second sounds selected to span the sorts of sounds that listeners most frequently encounter in day-to-day life [50]. All sounds were recognizable—i.e., classified correctly at least 80% of the time in a 10-way alternative forced choice task run on Amazon Mechanical Turk, with 55 to 60 participants per sound. See S1 Table for names of all stimuli and category assignments. To download all 165 sounds, see the McDermott lab website: <http://mcdermottlab.mit.edu/downloads.html>.

**fMRI scanning procedure.** Sounds were presented using a block design. Each block included 5 presentations of the identical 2-second sound clip. After each 2-second sound, a single fMRI volume was collected (“sparse scanning”), such that sounds were not presented simultaneously with the scanner noise. Each acquisition lasted 1 second and stimuli were presented during a 2.4-second interval (200 ms of silence before and after each sound to minimize forward/backward masking by scanner noise). Each block lasted 17 seconds (5 repetitions of a 3.4-second repetition time (TR)). This design was selected based on pilot results showing that it gave more reliable responses than an event-related design given the same amount of overall scan time. Blocks were grouped into 11 runs, each with 15 stimulus blocks and 4 blocks of

silence. Silence blocks were the same duration as the stimulus blocks and were spaced randomly throughout the run. Silence blocks were included to enable estimation of the baseline response. To encourage participants to attend equally to each sound, participants performed a sound intensity discrimination task. In each block, one of the 5 sounds was 7 dB lower than the other 4 (the quieter sound was never the first sound). Participants were instructed to press a button when they heard the quieter sound.

**fMRI data acquisition.** MR data were collected on a 3T Siemens Trio scanner with a 32-channel head coil at the Athinoula A. Martinos Imaging Center of the McGovern Institute for Brain Research at MIT. Each functional volume consisted of 15 slices oriented parallel to the superior temporal plane, covering the portion of the temporal lobe superior to and including the superior temporal sulcus. TR was 3.4 seconds (although acquisition time was only 1 second), echo time (TE) was 30 ms, and flip angle was 90 degrees. For each run, the 5 initial volumes were discarded to allow homogenization of the magnetic field. In-plane resolution was  $2.1 \times 2.1$  mm ( $96 \times 96$  matrix), and slice thickness was 4 mm with a 10% gap, yielding a voxel size of  $2.1 \times 2.1 \times 4.4$  mm. iPAT was used to minimize acquisition time. T1-weighted anatomical images were collected in each participant (1 mm isotropic voxels) for alignment and surface reconstruction.

**fMRI data preprocessing.** Functional volumes were preprocessed using FSL and in-house MATLAB scripts. Volumes were corrected for motion and slice time. Volumes were skull stripped, and voxel time courses were linearly detrended. Each run was aligned to the anatomical volume using FLIRT and BBRegister [138,139]. These preprocessed functional volumes were then resampled to vertices on the reconstructed cortical surface computed via FreeSurfer [140] and were smoothed on the surface with a 3-mm FWHM 2D Gaussian kernel to improve SNR. All analyses were done in this surface space, but for ease of discussion, we refer to vertices as “voxels” throughout this paper. For each of the 3 scan sessions, we estimated the mean response of each voxel (in the surface space) to each stimulus block by averaging the response of the second through the fifth acquisitions after the onset of each block (the first acquisition was excluded to account for the hemodynamic lag). Pilot analyses showed similar response estimates from a more traditional GLM. These signal-averaged responses were converted to percent signal change (PSC) by subtracting and dividing by each voxel’s response to the blocks of silence. These PSC values were then downsampled from the surface space to a 2-mm isotropic grid on the FreeSurfer-flattened cortical sheet. For summary maps, we registered each participant’s surface to FreeSurfer’s fsaverage template.

**Voxel selection.** For individual participant analyses, we used the same voxel selection criterion as Kell and colleagues [31], selecting voxels with a consistent response to sounds from a large anatomical constraint region encompassing the superior temporal and posterior parietal cortex. Specifically, we used 2 criteria: (1) a significant response to sounds compared with silence ( $p < 0.001$ , uncorrected); and (2) a reliable response to the pattern of 165 sounds across scans. The reliability measure was as follows:

$$r = 1 - \frac{\|\mathbf{v}_{12} - \text{proj}_{\mathbf{v}_3} \mathbf{v}_{12}\|_2}{\|\mathbf{v}_{12}\|_2}$$

$$\text{proj}_{\mathbf{v}_3} \mathbf{v}_{12} = \left( \frac{\mathbf{v}_3 \cdot \mathbf{v}_{12}}{\|\mathbf{v}_3\|_2^2} \right) \mathbf{v}_3$$

where  $\mathbf{v}_{12}$  is the response of a single voxel to the 165 sounds averaged across the first 2 scans (a vector), and  $\mathbf{v}_3$  is that same voxel’s response measured in the third. The numerator in the second term in the first equation is the magnitude of the residual left in  $\mathbf{v}_{12}$  after projecting out



the response shared with  $v_3$ . This “residual magnitude” is divided by its maximum possible value (the magnitude of  $v_{1,2}$ ). The measure is bounded between 0 and 1 but differs from a correlation in assigning high values to voxels with a consistent response to the sound set, even if the response does not vary substantially across sounds. We found that using a more traditional correlation-based reliability measure excluded many voxels in primary auditory cortex because some of them exhibit only modest response variation across natural sounds. We included voxels with a value of this modified reliability measure of 0.3 or higher, which when combined with the sound responsive  $t$  test yielded a total of 7,694 voxels across the 8 participants (mean number of voxels per participant: 961.75; range: 637 to 1,221).

## fMRI data (B2021)

**fMRI cortical responses to natural sounds.** The fMRI data analyzed here is from Boebinger and colleagues’ article [51]. Twenty participants (14 female, mean age: 25 years, range: 18 to 34; all right-handed) completed 3 scanning sessions (each approximately 2 hours). Half of these participants ( $n = 10$ ) were highly trained musicians, with an average of 16.3 years of formal training (ranging from 11 to 23 years,  $SD = 2.5$ ) that began before the age of 7 [141] and continued until the time of scanning. The other half of the participants ( $n = 10$ ) were non-musicians with less than 2 years of total music training, which could not have occurred either before the age of 7 or within the 5 years preceding the time of scanning. All participants provided informed consent, and the Massachusetts Institute of Technology Committee on the Use of Humans as Experimental Subjects approved experiments (protocol number 2105000382).

**Natural sound stimuli.** The stimuli consisted of the set of 165 two-second natural sounds from Norman-Haignere and colleagues’ article [50], as well as 27 additional music and drumming clips from a variety of musical cultures, for a total of 192 sounds. For consistency with Norman-Haignere and colleagues’ [50] dataset, we constrained our analyses to the same set of 165 sounds.

**fMRI scanning procedure.** The fMRI scanning procedure was similar to the design of Norman-Haignere and colleagues [50], except for the following minor differences. Each stimulus block consisted of 3 repetitions of an identical 2-second sound clip and lasted 10.2 seconds (3 repetitions of a 3.4-second TR). Each of the 3 scanning sessions consisted of 16 runs (for a total of 48 functional runs per participant), with each run containing 24 stimulus blocks and 5 silent blocks of equal duration that were evenly distributed throughout the run. The shorter stimulus blocks used in this experiment allowed each stimulus block to be presented 6 times throughout the course of the 48 runs. To encourage participants to attend equally to each sound, participants performed a sound intensity discrimination task. In each block, either the second or third repetition was 12 dB lower, and participants were instructed to press a button when they heard the quieter sound.

**fMRI data acquisition.** The data acquisition parameters were similar to those from Norman-Haignere and colleagues [50], with a few minor differences. MR data were collected on a 3T Siemens Prisma scanner with a 32-channel head coil at the Athinoula A. Martinos Imaging Center of the McGovern Institute for Brain Research at MIT. Each functional volume consisted of 48 slices oriented parallel to the superior temporal plane, covering the whole brain. However, all analyses were restricted to an anatomical mask encompassing the same portions of the temporal and parietal lobes as in Norman-Haignere and colleagues’ article [50]. TR was 3.4 seconds (TA = 1 second), TE was 33 ms, and flip angle was 90 degrees. For each run, the 4 initial volumes were discarded to allow homogenization of the magnetic field. In-plane resolution was  $2.1 \times 2.1$  mm ( $96 \times 96$  matrix), and slice thickness was 3 mm with a 10% gap, yielding

a voxel size of  $2.1 \times 2.1 \times 3.3$  mm. An SMS acceleration factor of 4 was used in order to minimize acquisition time. T1-weighted anatomical images were collected in each participant (1 mm isotropic voxels) for alignment and surface reconstruction.

**fMRI data preprocessing.** Preprocessing was identical to Norman-Haignere and colleagues' [50]. However, the initial analyses of this dataset differ from Norman-Haignere and colleagues' [50] in that a GLM was used to estimate voxel responses rather than signal averaging, which was necessary due to the use of shorter stimulus blocks that caused more overlap between BOLD responses to different stimuli. For each of the 3 scan sessions, we estimated the mean response of each voxel (in the surface space) by modeling each block as a boxcar function convolved with a canonical hemodynamic response function (HRF). The model also included 6 motion regressors and a first-order polynomial noise regressor to account for linear drift in the baseline signal. The resulting voxel beta weights were then downsampled from the surface space to a 2-mm isotropic grid on the FreeSurfer-flattened cortical sheet. For summary maps, we registered each participant's surface to Freesurfer's fsaverage template.

**Voxel selection.** The process of selecting voxels was identical to Norman-Haignere and colleagues' process [50], except that the reliability of voxel responses was determined by comparing the vectors of 192 beta weights estimated separately for the two-halves of the data ( $v_1$  = first 3 repetitions from runs 1 to 24,  $v_2$  = last 3 repetitions from runs 25 to 48). Voxels were selected using the following reliability measure:

$$r = 1 - \frac{\|\mathbf{v}_{12} - \text{proj}_{\mathbf{v}_3} \mathbf{v}_{12}\|_2^2}{\|\mathbf{v}_{12}\|_2^2}$$

$$\text{proj}_{\mathbf{v}_3} \mathbf{v}_{12} = \left( \frac{\mathbf{v}_3 \cdot \mathbf{v}_{12}}{\|\mathbf{v}_3\|_2^2} \right) \mathbf{v}_3$$

including voxels with a value of 0.3 or higher and further selecting only voxels with significant responses to sounds ( $p < 0.001$ , uncorrected). The combination of these 2 criteria yielded a total of 26,792 voxels across the 20 participants (mean number of voxels per participant: 1,340; range: 1,020 to 1,828).

## Candidate models

We investigated a set of  $n = 19$  candidate models. Nine of these models were trained by other labs for engineering purposes ("external"), and 10 of these models were trained by us ("in-house"). Tables 1 and 2 show an overview of the 9 external models and 10 in-house models, respectively. For completeness, the SpectroTemporal baseline model is included in Table 2 along with the in-house models. Details on model architectures and training can be found below. For each model description, the model stage names match those in the code implementing the model. In the model-brain similarity analyses, we only included layers with learned parameters.

**External models.** Nine external models implemented in PyTorch were obtained from publicly available repositories. To our knowledge, the requirement that models be available in PyTorch implementations (at the time our experiments were run) resulted in the exclusion of 3 models that we would have otherwise included: YAMNet [55,156] (<https://github.com/tensorflow/models/tree/master/research/audioset/yamnet>), DeepSpeech1 [157] (<https://github.com/mozilla/DeepSpeech>), and NPC [158] (<https://github.com/Alexander-H-Liu/NPC>). To accommodate the required dependencies, a separate software environment was created to run

each model, and the versions of Python, PyTorch, and TorchAudio are reported separately for each model.

**AST.** Audio Spectrogram Transformer (AST) is an attention-based, convolution-free transformer architecture for audio classification.

We used the pretrained model available by Yuan Gong and colleagues as described in Gong and colleagues' article [142]. Specifically, we used the model that was pretrained on ImageNet [124] using a vision transformer architecture (data-efficient image Transformer [159]) and afterwards trained on AudioSet [55] (the best single model checkpoint that consisted of a model where all weights were averaged across model checkpoints from the first to last training epoch, model name: "Full AudioSet, 10 tstride, 10 fstride, with Weight Averaging (0.459 mAP)" (<https://github.com/YuanGongND/ast>)).

AST is composed of an initial embedding layer followed by 12 multilevel encoder blocks that match the transformer architecture [160,161]. Model activations were extracted at the output of each transformer encoder block. In addition to model activations from the transformer blocks, we extracted the initial embeddings that are fed to the model, as well as the final logits over AudioSet classes, yielding 14 layers in total.

As described in Gong and colleagues' article [142], the audio input to AST is the raw audio waveform that is converted into a sequence of 128 log-mel filterbank features computed with 25 ms Hamming windows every 10 ms. As the model was trained on AudioSet, the input size to the model was 10.24 seconds (1,024 time frames). The model implementation zero-padded any input less than this length. Thus, the spectrogram was of size [1,24, 128] ( $[n_{\text{temporal}}, n_{\text{spectral}}]$ ), which in our analyses resulted from a zero-padded 2-second audio clip. The spectrogram was normalized by subtracting the average value measured from the training dataset spectrograms (in this case, AudioSet) and dividing by 2 times the training dataset spectrogram standard deviation. The spectrogram was split into a sequence of 101  $16 \times 16$  patches (see Gong and colleagues' article [142] for details on the patch embedding procedure) with an overlap of 6 in both time and frequency (i.e., stride [10, 10]). These patches were projected into an embedding of size 768 ("the patch embedding layer") using the single convolutional layers as specified under "Architecture" in Gong and colleagues' article [142]. Two classification tokens were prepended to the embedding, which was then passed through 12 transformer encoder blocks. AST was trained on the full AudioSet dataset (consisting of the official balanced and full training set, i.e., around 2M segments) using cross-entropy. The final layer was a linear classification layer over 527 audio labels.

*Architecture.* The AST architecture is denoted in Table 3 with the sizes of the tensors propagated through the network denoted in parentheses. Encoder refers to each transformer encoding block. Model stages that were used for voxel and component response modeling are denoted in bold. Here and elsewhere, the model stage names match those in the code implementing the model.

For AST, we thus extracted model representations from the following 14 layers with the number of unit activations (regressors) for each sound denoted in parentheses: Embedding (768), Encoder\_1 (768), Encoder\_2 (768), Encoder\_3 (768), Encoder\_4 (768), Encoder\_5 (768), Encoder\_6 (768), Encoder\_7 (768), Encoder\_8 (768), Encoder\_9 (768), Encoder\_10 (768), Encoder\_11 (768), Encoder\_12 (768), Linear\_1 (527).

Extractions were performed using torch = 1.8.1, torchaudio = 0.8.1 in Python 3.8.11.

**DCASE2020 baseline.** The DCASE2020 baseline model (henceforth DCASE2020) is recurrent architecture trained for automated audio captioning [143], where the model accepts audio as input and outputs the textual description (i.e., the caption) of that signal. We used the pretrained model implemented by Drossos and colleagues (<https://github.com/audio-captioning/dcase-2020-baseline>).

Table 3. AST architecture.

|                                                                             |                       |
|-----------------------------------------------------------------------------|-----------------------|
| <b>Input</b>                                                                | <b>(1,024,128)</b>    |
| <b>Embedding: Conv2d(1, 768, kernel_size = [16, 16], stride = [10, 10])</b> | <b>(12, 101, 768)</b> |
| <b>Encoder_1</b>                                                            | <b>(1,214, 768)</b>   |
| <b>Encoder_2</b>                                                            | <b>(1,214, 768)</b>   |
| <b>Encoder_3</b>                                                            | <b>(1,214, 768)</b>   |
| <b>Encoder_4</b>                                                            | <b>(1,214, 768)</b>   |
| <b>Encoder_5</b>                                                            | <b>(1,214, 768)</b>   |
| <b>Encoder_6</b>                                                            | <b>(1,214, 768)</b>   |
| <b>Encoder_7</b>                                                            | <b>(1,214, 768)</b>   |
| <b>Encoder_8</b>                                                            | <b>(1,214, 768)</b>   |
| <b>Encoder_9</b>                                                            | <b>(1,214, 768)</b>   |
| <b>Encoder_10</b>                                                           | <b>(1,214, 768)</b>   |
| <b>Encoder_11</b>                                                           | <b>(1,214, 768)</b>   |
| <b>Encoder_12</b>                                                           | <b>(1,214, 768)</b>   |
| <b>Linear_1(in_features = 768, out_features = 527, bias = True)</b>         | <b>(1, 527)</b>       |

<https://doi.org/10.1371/journal.pbio.3002366.t003>

The input to the model is a log-mel spectrogram (audio was peak normalized prior to spectrogram conversion, i.e., divided by the maximum value of the absolute value of the audio signal) with 64 frequency bins resulting from a short-time Fourier transform applying 23 ms windows (window size) every 11.5 ms (stride). This yields log spectrogram patches of 173 × 64 bins that are the inputs to the model, i.e., a 2D array [n\_temporal, n\_spectral]. These spectrograms are passed through a 3-layer bidirectional GRU encoder and a one bidirectional layer GRU decoder with a linear readout. There are residual connections between the second and third encoder GRUs. The linear readout is a linear projection into C classes representing the 4,367 one-hot encoding of unique caption words. The decoder iterates for 22 time steps.

DCASE2020 was trained using cross-entropy loss on the development split of Clotho v1 [144], which consists of 2,893 audio clips with 14,465 captions. The audio samples are of 15- to 30-second duration, each audio sample having 5 captions of length 8 to 20 words.

*Architecture.* The DCASE2020 architecture is denoted in Table 4 with the sizes of the tensors propagated through the network denoted in parentheses. Model stages that were used for voxel and component response modeling are denoted in bold. The 2 outputs of bidirectional recurrent stages were concatenated (i.e., treated as different features).

Thus, for DCASE, we extracted model representations from the following 5 layers with the number of unit activations (regressors) for each sound denoted in parentheses: GRU\_1 (512), GRU\_2 (512), GRU\_3 (512), GRU\_4 (256), Linear\_1 (4367).

Extractions were performed using torch = 1.3.1 in Python 3.7.10.

Table 4. DCASE2020 architecture.

|                                                                          |                    |
|--------------------------------------------------------------------------|--------------------|
| <b>Input</b>                                                             | <b>(173, 64)</b>   |
| Dropout( $p = 0.25$ )                                                    |                    |
| <b>GRU_1(input_size = 64, output_size = 256, bidirectional = True)</b>   | <b>(2,256)</b>     |
| <b>GRU_2(input_size = 512, output_size = 256, bidirectional = True)</b>  | <b>(2,256)</b>     |
| <b>GRU_3(input_size = 512, output_size = 256, bidirectional = True)</b>  | <b>(2,256)</b>     |
| Dropout( $p = 0.25$ )                                                    |                    |
| <b>GRU_4(input_size = 512, output_size = 256, bidirectional = False)</b> | <b>(1,256)</b>     |
| <b>Linear_1(in_features = 256, out_features = 4367)</b>                  | <b>(22, 4,367)</b> |

<https://doi.org/10.1371/journal.pbio.3002366.t004>

**DeepSpeech2.** DeepSpeech2 is a recurrent architecture for automatic speech recognition [145]. We used the pretrained PyTorch model by Sean Naren and collaborators (<https://github.com/SeanNaren/deepspeech.pytorch>).

As described by Amodei and colleagues [145], the input to the model is a log-spectrogram with 161 frequency bins resulting from a short-time Fourier transform applying 20 ms windows (window size) every 10 ms (stride). This yields log spectrogram patches of  $201 \times 161$  bins that are the inputs to the model, i.e., a 2D array [n\_temporal, n\_spectral]. Each spectrogram was normalized by subtracting the mean spectrogram value and dividing by the standard deviation. These spectrograms were transformed by two 2D convolutional layers followed by 5 bidirectional recurrent long short-term memory (LSTM) layers and ending in a fully connected layer. The fully connected layer is a linear projection into C classes representing the vocabulary of the task. The vocabulary consists of 29 classes (output features), corresponding to English characters and space, apostrophe, blank. DeepSpeech2 was trained using a CTC loss on the Librispeech corpus [146] (960 hours).

*Architecture.* The DeepSpeech2 architecture is denoted in Table 5 with the sizes of the tensors propagated through the network denoted in parentheses. Model stages that were used for voxel and component response modeling are denoted in bold. The 2 outputs of bidirectional recurrent stages (using the LSTM output cell states) were concatenated (i.e., treated as different features).

Thus, for DeepSpeech2, we extracted model representations from the following 8 layers with the number of unit activations (regressors) for each sound denoted in parentheses: HardTanh\_1 (2,592), HardTanh\_2 (1,312), LSTM\_1 (2,048), LSTM\_2 (2,048), LSTM\_3 (2,048), LSTM\_4 (2,048), LSTM\_5 (2,048), Linear\_1 [29].

Extractions were performed using torch = 1.7.1, torchaudio = 0.7.2 in Python 3.6.13.

**MetricGAN.** MetricGAN+ (henceforth MetricGAN) is a generative adversarial network (GAN) for speech enhancement. We used the pretrained model available by SpeechBrain

**Table 5. DeepSpeech2 architecture.**

| Input                                                                                                  | (201, 161)        |
|--------------------------------------------------------------------------------------------------------|-------------------|
| Conv2d_1(in_channels = 1, out_channels = 32, kernel_size = [41,11], stride = [2,2], padding = [20,5])  | [32, 81, 101]     |
| BatchNorm2d_1(num_features = 32)                                                                       | [32, 81, 101]     |
| <b>HardTanh_1(min_val = 0, max_val = 20)</b>                                                           | [32, 81, 101]     |
| Conv2d_2(in_channels = 32, out_channels = 32, kernel_size = [21,11], stride = [2,1], padding = [10,5]) | [32, 41, 101]     |
| BatchNorm2d_2(num_features = 32)                                                                       | [32, 41, 101]     |
| <b>HardTanh_2(min_val = 0, max_val = 20)</b>                                                           | [32, 41, 101]     |
| <b>LSTM_1(input_size = 1,312, hidden_size = 1,024, bidirectional = True)</b>                           | <b>(2, 1,024)</b> |
| SequenceWise BatchNorm1d_1(num_features = 1,024)                                                       | (101, 1,024)      |
| <b>LSTM_2(input_size = 1,024, hidden_size = 1,024, bidirectional = True)</b>                           | <b>(2, 1,024)</b> |
| SequenceWise BatchNorm1d_2(num_features = 1,024)                                                       | (101, 1,024)      |
| <b>LSTM_3(input_size = 1,024, hidden_size = 1,024, bidirectional = True)</b>                           | <b>(2, 1,024)</b> |
| SequenceWise BatchNorm1d_3(num_features = 1,024)                                                       | (101, 1,024)      |
| <b>LSTM_4(input_size = 1,024, hidden_size = 1,024, bidirectional = True)</b>                           | <b>(2, 1,024)</b> |
| SequenceWise BatchNorm1d_4(num_features = 1,024)                                                       | (101, 1,024)      |
| <b>LSTM_5(input_size = 1,024, hidden_size = 1,024, bidirectional = True)</b>                           | <b>(2, 1,024)</b> |
| BatchNorm1d_5(num_features = 1,024)                                                                    | (101, 1,024)      |
| <b>Linear_1(in_features = 1,024, out_features = 29)</b>                                                | [101, 29]         |

<https://doi.org/10.1371/journal.pbio.3002366.t005>

[162] (hosted by HuggingFace) as described in Fu and colleagues' article [147]. Specifically, we used a model that was pretrained on the Voicebank-DEMAND dataset [148] (training files: 20,000 (58.03 hours) + validation files: 5,000 (14.65 hours)) (<https://huggingface.co/speechbrain/metricgan-plus-voicebank>).

The generator of MetricGAN is a bidirectional long short-term memory (BLSTM) with 2 bidirectional LSTM layers followed by 2 fully connected layers. The objective of the generator is to estimate a mask consisting of the noise in the signal in order to generate clean speech. The discriminator of MetricGAN consists of a convolutional architecture (not investigated here).

As described in Fu and colleagues' article [147], the audio input to the model is the magnitude spectrogram resulting from a short-time Fourier transform applying 32 ms (window size) windows every 16 ms (stride) resulting in 256 power frequency bins. This yields magnitude spectrogram patches of  $126 \times 256$  bins that are the inputs to the model, i.e., a 2D array [n\_temporal, n\_spectral] that are passed through the BLSTM and linear layers of the generator model.

*Architecture.* The MetricGAN architecture is denoted in Table 6 with the sizes of the tensors propagated through the network denoted in parentheses. Model stages that were used for voxel and component response modeling are denoted in bold. The 2 outputs of bidirectional recurrent stages (using the LSTM output cell states) were concatenated (i.e., treated as different features).

For MetricGAN, we thus extracted model representations from the following 4 layers with the number of unit activations (regressors) for each sound denoted in parentheses: LSTM\_1 (400), LSTM\_2 (400), LeakyReLU\_1 (300), Linear\_2 (257).

Extractions were performed using torch = 1.9.1, speechbrain = 0.5.10, huggingface-hub = 0.0.17 in Python 3.8.11.

**S2T.** S2T (also known as Speech-to-Text) is an attention-based transformer architecture for automatic speech recognition and speech-to-text translation. We used the pretrained model available by HuggingFace [163] as described in Wang and colleagues' article [149]. Specifically, we used the large model trained on Librispeech corpus [146] (960 hours) (<https://huggingface.co/facebook/s2t-large-librispeech-asr>).

S2T is an encoder-decoder model. The encoder part is composed of 2 convolutional layers followed by 12 multilevel encoder blocks that match the transformer architecture [160,161]. Model activations were extracted at the output of each transformer encoder block. In addition to model activations from the transformer blocks, we extracted the initial embeddings that were fed to the model, yielding 13 layers in total. We did not investigate the decoder part of the model.

As described by Wang and colleagues [149], the audio input to S2T is a log-mel spectrogram with 80 mel-spaced frequency bins resulting from a short-time Fourier transform applying 25 ms windows every 10 ms. Each spectrogram was normalized by subtracting the mean value of the spectrogram and dividing by the standard deviation. This yields the log-mel spectrogram of  $198 \times 80$  bins that are the inputs to the model, i.e., a 2D array [n\_temporal,

**Table 6. MetricGAN architecture.**

|                                                                          |                   |
|--------------------------------------------------------------------------|-------------------|
| <b>Input</b>                                                             | <b>(126, 257)</b> |
| <b>LSTM_1(input_size = 257, hidden_size = 200, bidirectional = True)</b> | <b>(2, 200)</b>   |
| <b>LSTM_2(input_size = 257, hidden_size = 200, bidirectional = True)</b> | <b>(2, 200)</b>   |
| Linear_1(in_features = 400, out_features = 300, bias = True)             | (126, 300)        |
| <b>LeakyReLU_1</b>                                                       | <b>(126, 300)</b> |
| <b>Linear_2(in_features = 300, out_features = 257, bias = True)</b>      | <b>(126, 257)</b> |

<https://doi.org/10.1371/journal.pbio.3002366.t006>

Table 7. S2T architecture.

|                                             |                    |
|---------------------------------------------|--------------------|
| <b>Input</b>                                | <b>(198, 80)</b>   |
| <b>Embedding/input post feature encoder</b> | <b>(50, 1,024)</b> |
| <b>Encoder_1</b>                            | <b>(50, 1,024)</b> |
| <b>Encoder_2</b>                            | <b>(50, 1,024)</b> |
| <b>Encoder_3</b>                            | <b>(50, 1,024)</b> |
| <b>Encoder_4</b>                            | <b>(50, 1,024)</b> |
| <b>Encoder_5</b>                            | <b>(50, 1,024)</b> |
| <b>Encoder_6</b>                            | <b>(50, 1,024)</b> |
| <b>Encoder_7</b>                            | <b>(50, 1,024)</b> |
| <b>Encoder_8</b>                            | <b>(50, 1,024)</b> |
| <b>Encoder_9</b>                            | <b>(50, 1,024)</b> |
| <b>Encoder_10</b>                           | <b>(50, 1,024)</b> |
| <b>Encoder_11</b>                           | <b>(50, 1,024)</b> |
| <b>Encoder_12</b>                           | <b>(50, 1,024)</b> |

<https://doi.org/10.1371/journal.pbio.3002366.t007>

n\_spectral]. The spectrogram is passed through 2 convolutional layers before it is then passed through the 12 transformer encoder blocks. S2T was trained using cross-entropy loss, and the output consists of the 10K unigram vocabulary from SentencePiece [164].

*Architecture.* The S2T architecture is denoted in Table 7 with the sizes of the tensors propagated through the network denoted in parentheses (which is determined by the total stride in the initial feature encoder part of the architecture; not investigated here). Encoder refers to each transformer encoding block. Model stages that were used for voxel and component response modeling are denoted in bold.

Thus, for S2T, we extracted model representations from the following 13 layers with the number of unit activations (regressors) for each sound denoted in parentheses: Embedding (1,024), Encoder\_1 (1,024), Encoder\_2 (1,024), Encoder\_3 (1,024), Encoder\_4 (1,024), Encoder\_5 (1,024), Encoder\_6 (1,024), Encoder\_7 (1,024), Encoder\_8 (1,024), Encoder\_9 (1,024), Encoder\_10 (1,024), Encoder\_11 (1,024), Encoder\_12 (1,024).

Extractions were performed using transformers = 4.10.0, torch = 1.9.0, huggingface-hub = 0.0.16 in Python 3.8.11.

**SepFormer.** SepFormer (also known as Separation Transformer) is an attention-based transformer architecture for speech separation. We used the pretrained model available by SpeechBrain [162] (hosted by HuggingFace) as described in Subakan and colleagues' article [150]. Specifically, we used a model that was pretrained on the WHAMR! dataset [151] (training files: 20,000 (58.03 hours) + validation files: 5,000 (14.65 hours)) (<https://huggingface.co/speechbrain/sepformer-whamr>).

SepFormer is composed of an initial encoder followed by 32 multilevel dual-path encoder blocks similar to the transformer architecture [160,161] followed by a decoder. The transformer blocks follow a dual-path framework consisting of transformer blocks that model short-term dependencies (IntraTransformer, IntraT) and transformer blocks that model longer-term dependencies (InterTransformer, InterT). There are, respectively, 8 such IntraT and InterT blocks, yielding 16 transformer blocks, which is then repeated twice, yielding 32 transformer blocks in total. The objective of the dual-path transformer architecture is to estimate optimal masks to separate the audio sources present in the audio mixtures. The model was trained using scale-invariant source-to-noise ratio loss.

As described in Subakan and colleagues' article [150], the audio input to SepFormer is the raw audio waveform that is transformed by a single convolutional layer (encoder) followed by

**Table 8. SepFormer architecture.**

|                                                                           |                       |
|---------------------------------------------------------------------------|-----------------------|
| <b>Input</b>                                                              | <b>(1, 16,000)</b>    |
| Embedding: Conv1d(1, 256, kernel_size = (16), stride = (8), bias = False) | (256, 1,999)          |
| <b>ReLU_1()</b>                                                           | <b>(256, 1,999)</b>   |
| Conv1d(256, 256, kernel_size = (1), stride = (1), bias = False)           | (256, 1,999)          |
| <b>Encoder_1</b>                                                          | <b>(18, 250, 256)</b> |
| <b>Encoder_2</b>                                                          | <b>(18, 250, 256)</b> |
| ...                                                                       | ...                   |
| <b>Encoder_31</b>                                                         | <b>(18, 250, 256)</b> |
| <b>Encoder_32</b>                                                         | <b>(18, 250, 256)</b> |

<https://doi.org/10.1371/journal.pbio.3002366.t008>

chunking the temporal dimension into patches of size 250. These chunks were then passed through the 32 transformer encoder blocks.

Model activations were extracted at the output of each transformer encoder block. In addition to model activations from the transformer blocks, we extracted the initial encoder embeddings that are fed to the model, yielding 33 layers in total.

*Architecture.* The SepFormer architecture is denoted in [Table 8](#) with the sizes of the tensors propagated through the network denoted in parentheses. Encoder refers to each transformer encoding block. Model stages that were used for voxel and component response modeling are denoted in bold.

For SepFormer, we thus extracted model representations from the following 33 layers with the number of unit activations (regressors) for each sound denoted in parentheses: Embedding (after ReLU) (256), Encoder\_1 (256), Encoder\_2 (256), . . . , Encoder\_31 (256), Encoder\_32 (256).

Extractions were performed using torch = 1.9.1, speechbrain = 0.5.10, huggingface-hub = 0.0.17 in Python 3.8.11.

**VGGish.** VGGish is a convolutional architecture for audio classification inspired by the VGG model for image recognition [165]. VGGish converts audio input features into a semantically meaningful, 128-dimensional embedding. We used the pretrained VGGish by Hershey and colleagues [152] (<https://github.com/tensorflow/models/tree/master/research/audioset>, specifically the PyTorch-compatible port by Harri Taylor and collaborators as found here: <https://github.com/harritaylor/torchvggish>).

VGGish was trained on the YouTube-100M corpus (70M training videos, 5.24 million hours with 30,871 labels) [152]. The videos average 4.6 minutes and are (machine) labeled with 5 labels on average per video from the set of 30,871 labels. The model was trained to predict the video-level labels based on audio information using a cross-entropy loss function. As described by Hershey and colleagues [152], the audio input consists of 960 ms audio frames that are decomposed with a short-time Fourier transform applying 25 ms (window size) windows every 10 ms (stride) resulting in 64 log mel-spaced frequency bins. This yields log-mel spectrogram patches of  $96 \times 64$  bins that are the inputs to the model, i.e., a 3D array [n\_frames, n\_temporal, n\_spectral]. Given that VGGish contained an additional temporal dimension (the n\_frames dimension), we averaged over both temporal dimensions (the n\_temporal dimension, which corresponds to the time dimension of the spectrogram as well as the n\_frames dimension, which corresponds to the batch dimension) to obtain a time-averaged model representation.

*Architecture.* The VGGish architecture is denoted in [Table 9](#) with the sizes of the tensors propagated through the network denoted in parentheses. Model stages that were used for voxel and component response modeling are denoted in bold.



**Table 9. VGGish architecture.**

|                                                                                                       |                         |
|-------------------------------------------------------------------------------------------------------|-------------------------|
| <b>Input</b>                                                                                          | <b>[2, 96, 64]</b>      |
| Conv2d_1(in_channels = 1, out_channels = 64, kernel_size = [3,3], stride = [1,1], padding = [1,1])    | [2, 64, 96, 64]         |
| <b>ReLU_1()</b>                                                                                       | [2, 64, 96, 64]         |
| <b>MaxPool2d_1(kernel_size = 2, stride = 2, padding = 0)</b>                                          | [2, 64, 48, 32]         |
| Conv2d_2(in_channels = 64, out_channels = 128, kernel_size = [3,3], stride = [1,1], padding = [1,1])  | [2, 128, 48, 32]        |
| <b>ReLU_2()</b>                                                                                       | [2, 128, 48, 32]        |
| <b>MaxPool2d_2(kernel_size = 2, stride = 2, padding = 0)</b>                                          | [2, 128, 24, 16]        |
| Conv2d_3(in_channels = 128, out_channels = 256, kernel_size = [3,3], stride = [1,1], padding = [1,1]) | (2, 256, 24, 16)        |
| <b>ReLU_3()</b>                                                                                       | <b>(2, 256, 24, 16)</b> |
| Conv2d_4(in_channels = 256, out_channels = 256, kernel_size = [3,3], stride = [1,1], padding = [1,1]) | (2, 256, 24, 16)        |
| <b>ReLU_4()</b>                                                                                       | <b>(2, 256, 24, 16)</b> |
| <b>MaxPool2d_4(kernel_size = 2, stride = 2, padding = 0)</b>                                          | <b>(2, 256, 12, 8)</b>  |
| Conv2d_5(in_channels = 256, out_channels = 512, kernel_size = [3,3], stride = [1,1], padding = [1,1]) | (2, 512, 12, 8)         |
| <b>ReLU_5()</b>                                                                                       | <b>(2, 512, 12, 8)</b>  |
| Conv2d_6(in_channels = 512, out_channels = 512, kernel_size = [3,3], stride = [1,1], padding = [1,1]) | (2, 512, 12, 8)         |
| <b>ReLU_6()</b>                                                                                       | <b>(2, 512, 12, 8)</b>  |
| <b>MaxPool2d_6(kernel_size = 2, stride = 2, padding = 0)</b>                                          | <b>(2, 512, 6, 4)</b>   |
| Linear_1(in_features = 12,288, out_features = 4,096)                                                  | (2, 4,096)              |
| <b>ReLU_7()</b>                                                                                       | <b>(2, 4,096)</b>       |
| Linear_2(in_features = 4,096, out_features = 4,096)                                                   | (2, 4,096)              |
| <b>ReLU_8()</b>                                                                                       | <b>(2, 4,096)</b>       |
| Linear_3(in_features = 4,096, out_features = 128)                                                     | [2, 128]                |
| <b>ReLU_9()</b>                                                                                       | <b>[2, 128]</b>         |

<https://doi.org/10.1371/journal.pbio.3002366.t009>

Thus, for VGGish, we extracted model representations from the following 13 layers with the number of unit activations (regressors) for each sound denoted in parentheses: ReLU\_1 (4,096), MaxPool2d\_1 (2,048), ReLU\_2 (4,096), MaxPool2d\_2 (2,048), ReLU\_3 (4,096), ReLU\_4 (4,096), MaxPool2d\_3 (2,048), ReLU\_5 (4,096), ReLU\_6 (4,096), MaxPool2d\_4 (2,048), ReLU\_7 (4,096), ReLU\_8 (4,096), ReLU\_9 [128].

Extractions were performed using torch = 1.8.0 and torchaudio = 0.8.1 in Python 3.8.5.

**VQ-VAE (ZeroSpeech2020).** Vector-quantized variational autoencoder (henceforth VQ-VAE) is an encoder-decoder architecture trained for audio reconstruction, which can then be used to generate speech in a target speaker's voice. The model was trained for the ZeroSpeech 2020 challenge [166]. We used the pretrained model by Benjamin van Niekerk and colleagues as described in Niekerk and colleagues' article [153] (<https://github.com/bshall/ZeroSpeech>).

VQ-VAE consists of a CNN-based encoder and an RNN-based decoder. The encoder encodes the audio spectrogram, and the decoder produces the new sound waveform. The model maps speech into a discrete latent space before reconstructing the original waveform.

As described by Niekerk and colleagues [153], the input to VQ-VAE is the log-mel spectrogram (audio was peak normalized prior to spectrogram conversion by dividing by the maximum of the absolute value of the audio signal, and this signal was multiplied by 0.999) with 80 mel-spaced frequency bins resulting from a short-time Fourier transform applying 25 ms

**Table 10. VQ-VAE architecture.**

|                                                                                          |                   |
|------------------------------------------------------------------------------------------|-------------------|
| <b>Input</b>                                                                             | <b>(80, 201)</b>  |
| Conv1d(80, 768, kernel_size = (3), stride = (1), bias = False)                           | (768, 199)        |
| BatchNorm1d(768, eps = 1e-05, momentum = 0.1, affine = True, track_running_stats = True) | (768, 199)        |
| <b>ReLU_1(0)</b>                                                                         | <b>(768, 199)</b> |
| Conv1d(768, 768, kernel_size = (3), stride = (1), padding = (1), bias = False)           | (768, 199)        |
| BatchNorm1d(768, eps = 1e-05, momentum = 0.1, affine = True, track_running_stats = True) | (768, 199)        |
| <b>ReLU_2(0)</b>                                                                         | <b>(768, 199)</b> |
| Conv1d(768, 768, kernel_size = (4), stride = (2), padding = (1), bias = False)           | (768, 99)         |
| BatchNorm1d(768, eps = 1e-05, momentum = 0.1, affine = True, track_running_stats = True) | (768, 99)         |
| <b>ReLU_3(0)</b>                                                                         | <b>(768, 99)</b>  |
| Conv1d(768, 768, kernel_size = (3), stride = (1), padding = (1), bias = False)           | (768, 99)         |
| BatchNorm1d(768, eps = 1e-05, momentum = 0.1, affine = True, track_running_stats = True) | (768, 99)         |
| <b>ReLU_4(0)</b>                                                                         | <b>(768, 99)</b>  |
| Conv1d(768, 768, kernel_size = (3), stride = (1), padding = (1), bias = False)           | (768, 99)         |
| BatchNorm1d(768, eps = 1e-05, momentum = 0.1, affine = True, track_running_stats = True) | (768, 99)         |
| <b>ReLU_5(0)</b>                                                                         | <b>(768, 99)</b>  |

<https://doi.org/10.1371/journal.pbio.3002366.t010>

windows every 10 ms. This yields the log-mel spectrogram of  $201 \times 80$  bins that are the inputs to the model, i.e., a 2D array [n\_temporal, n\_spectral]. These spectrograms were transformed by five 1D convolutional layers. The model was trained to maximize the log-likelihood of the waveform given the discretized latent space bottleneck (details in Niekerk and colleagues' article [153]). The model was trained on the ZeroSpeech 2019 English dataset consisting of the Train Voice Dataset (4 hours 40 minutes) and the Train Unit Dataset (15 hours 40 minutes) [154]. To extract model activations, the audio samples were converted to the first encountered speaker ID on the available speaker ID list ("S015").

*Architecture.* The VQ-VAE encoder architecture is denoted in Table 10 with the sizes of the tensors propagated through the network denoted in parentheses. We did not investigate the decoder part of VQ-VAE. Model stages that were used for voxel and component response modeling are denoted in bold.

Thus, for VQ-VAE, we extracted model representations from the following 5 layers with the number of unit activations (regressors) for each sound denoted in parentheses: ReLU\_1 (768), ReLU\_2 (768), ReLU\_3 (768), ReLU\_4 (768), ReLU\_5 (768).

Extractions were performed using torch = 1.9.0 in Python 3.8.11.

**Wav2Vec2.** Wav2Vec2 is a self-supervised transformer architecture for automatic speech recognition that learns representations of speech from masked parts of raw audio. We used the pretrained model from Huggingface Transformers [163]; original model can be found here: <https://github.com/facebookresearch/fairseq/tree/main/examples/wav2vec#wav2vec-20>. Specifically, we used the base version trained and fine-tuned on the Librispeech corpus [146] (960 hours) (<https://huggingface.co/facebook/wav2vec2-base-960h>).

Wav2Vec2 is composed of an initial multilayer convolutional feature encoder followed by 12 multilevel encoder blocks that match the transformer architecture [160,161]. Model activations were extracted at the output of each transformer encoder block. In addition to model activations from the transformer blocks, we extracted the initial embeddings that are fed to the model, as well as the final logits over character tokens, yielding 14 layers in total.

As described by Baevski and colleagues [129], the audio input to Wav2Vec2 is a sound waveform of zero mean and unit variance. Wav2Vec2 is trained via a contrastive task where

Table 11. Wav2Vec2 architecture.

|                                             |                  |
|---------------------------------------------|------------------|
| <b>Input</b>                                | <b>(32,000)</b>  |
| <b>Embedding/input post feature encoder</b> | <b>(99, 768)</b> |
| Encoder_1                                   | (99, 768)        |
| Encoder_2                                   | (99, 768)        |
| Encoder_3                                   | (99, 768)        |
| Encoder_4                                   | (99, 768)        |
| Encoder_5                                   | (99, 768)        |
| Encoder_6                                   | (99, 768)        |
| Encoder_7                                   | (99, 768)        |
| Encoder_8                                   | (99, 768)        |
| Encoder_9                                   | (99, 768)        |
| Encoder_10                                  | (99, 768)        |
| Encoder_11                                  | (99, 768)        |
| Encoder_12                                  | (99, 768)        |
| Linear_1                                    | (99, 768)        |

<https://doi.org/10.1371/journal.pbio.3002366.t011>

the true speech input is masked in a latent space and has to be distinguished from distractors. The contrastive loss is augmented by a diversity loss to encourage the model to use samples equally often. The pretrained model is fine-tuned for speech recognition by adding a linear projection on top of the network into C classes representing the vocabulary of the task by minimizing a CTC loss [167]. The vocabulary consists of 32 classes (output features), corresponding to English characters + bos\_token = '<s>', eos\_token = '</s>', unk\_token = '<unk>', pad\_token = '<pad>', word\_delimiter\_token = '|'.

*Architecture.* The Wav2Vec2 architecture is denoted in Table 11 with the sizes of the tensors propagated through the network denoted in parentheses (which is determined by the total stride in the initial feature encoder part of the architecture; not investigated here). Encoder refers to each transformer encoding block. Model stages that were used for voxel and component response modeling are denoted in bold.

For Wav2Vec2, we thus extracted model representations from the following 14 layers with the number of unit activations (regressors) for each sound denoted in parentheses: Embedding (768), Encoder\_1 (768), Encoder\_2 (768), Encoder\_3 (768), Encoder\_4 (768), Encoder\_5 (768), Encoder\_6 (768), Encoder\_7 (768), Encoder\_8 (768), Encoder\_9 (768), Encoder\_10 (768), Encoder\_11 (768), Encoder\_12 (768), Linear\_1 [32].

Extractions were performed using transformers = 4.10.0, torch = 1.9.0, huggingface-hub = 0.0.16 in Python 3.8.11.

## In-house models

The in-house models consisted of a fixed cochleagram stage followed by either a convolutional architecture similar to that used in Kell and colleagues' article [31] or a ResNet50 architecture. We refer to the full model architectures as CochCNN9 (indicating the 9 stages of this model) and CochResNet50. The models were trained either on the Word-Speaker-Noise dataset [25], which supports 3 different tasks (word, speaker, and audio event recognition), or the musical genre dataset compiled in Kell and colleagues' article [31]. In-house models were trained and evaluated with Python 3.8.2 and PyTorch 1.5.0.

**Cochleagram inputs.** The SpectroTemporal model and all CochResNet50 and CochCNN9 architectures had a cochleagram representation as the input to the model. A

cochleagram is a time-frequency representation of the audio with frequency bandwidth and spacing that mimics the human ear, followed by a compressive nonlinearity [105,168]. The audio waveform passes through a bank of 211 bandpass filters ranging from 50 Hz to 10 kHz. Audio was sampled at 20 kHz for the SpectroTemporal and the Word, Speaker, and AudioSet task models and was sampled at 16 kHz for the genre task models. Filters are zero-phase with frequency response equal to the positive portion of a single period of a cosine function. Filter spacing was set by the Equivalent Rectangular Bandwidth ( $ERB_N$ ) scale. Filters perfectly tile the spectrum such that the summed square response across all frequencies is flat, which includes 4 low-pass and 4 high-pass filters. The envelope was extracted from each filter sub-band using the magnitude of the analytic signal (Hilbert transform), and the envelopes were raised to the power of 0.3 to simulate basilar membrane compression. The resulting envelopes were lowpass filtered and downsampled to 200 Hz, without any zero padding, resulting in a cochleagram representation of 211 frequency channels by 390 time points. This representation was the input to the auditory models. Cochleagram generation was implemented in PyTorch (code available: <https://github.com/jenellefeather/chcochleagram>).

**SpectroTemporal model.** For comparison to previous hand-engineered models of the auditory system, we included a single-layer SpectroTemporal model based on Chi and colleagues' article [45]. The main difference was that spectral filters were specified in cycles/erb (rather than cycles/octave) as the input signal to the model is a cochleagram with ERB-spaced filters. The model consists of a linear filter bank tuned to spectrotemporal modulations at different frequencies, spectral scales, and temporal rates. The different frequencies were implemented via applying the spectrotemporal filters as a 2D convolution with zero padding in frequency (800 samples) and time (211 samples). Spectrotemporal filters were constructed with center frequencies for the spectral modulations of [0.0625, 0.125, 0.25, 0.5, 1, 2] cycles/erb. Center frequencies for the temporal modulations consisted of [0.5, 1, 2, 4, 8, 16, 32, 64] and both upward and downward frequency modulations were included (resulting in 96 filters). An additional 6 purely spectral and 8 purely temporal modulation filters were included for a total of 110 modulation filters. To extract the power in each frequency band for each filter, we squared the output of each filter response at each time step and took the average across time for each frequency channel, similar to previous studies [31,45,57]. These power measurements were used as the regressors for voxel and component modeling (23,421 activations).

**CochCNN9 architecture.** The CochCNN9 architecture is based on the architecture in Kell and colleagues' article [31] that emerged from a neural network architecture search. The architecture used here differed in that the input to the first layer of the network is maintained as the  $211 \times 390$  size cochleagram rather than being reshaped to  $256 \times 256$ . The convolutional layer filters and pooling regions were adjusted from those of Kell and colleagues' [31] architecture to maintain the same receptive field size in frequency and time given the altered input dimensions. The other difference was that the network here was trained with batch normalization rather than the local response normalization used in Kell and colleagues' article [31]. Along with the CochResNet50, this architecture was used for task optimization comparisons throughout the paper.

The CochCNN9 architecture is denoted in Table 12 with the sizes of the tensors propagated through the network denoted in parentheses. Model stages that were used for voxel and component response modeling are denoted in, and num\_classes corresponds to the number of logits used for training each task (Table 1).

Thus, for CochCNN9, we extracted model representations from the following 10 layers with the number of unit activations (regressors) for each sound denoted in parentheses:

Cochleagram (211), ReLU\_1 (6,816), MaxPool2d\_1 (3,456), ReLU\_2 (4,608), MaxPool2d\_2 (2,304), ReLU\_3 (4,608), ReLU\_4 (9,216), ReLU\_5 (4,608), AvgPool\_1 (2,560), ReLU\_6 (4,096).

**Table 12. CochCNN9 architecture.**

|                                                                           |                       |
|---------------------------------------------------------------------------|-----------------------|
| Input (cochleagram)                                                       | (1,211,390)           |
| BatchNorm2d_1 [1]                                                         | (1,211,390)           |
| Conv2d_1(1, 96, kernel_size = [7, 14], stride = [3, 3], padding = 'same') | [96, 71, 130]         |
| <b>ReLU_1</b>                                                             | [96, 71, 130]         |
| <b>MaxPool2d_1(kernel_size = [2,5], stride = [2,2], padding = 'same')</b> | [96, 36, 65]          |
| BatchNorm2d_2 [96]                                                        | [96, 36, 65]          |
| Conv2d_2(96, 256, kernel_size = [4,8], stride = [2,2], padding = 'same')  | (256, 18, 33)         |
| <b>ReLU_2</b>                                                             | <b>(256, 18, 33)</b>  |
| <b>MaxPool2d_2(kernel_size = [2,5], stride = [2,2], padding = 'same')</b> | <b>(256, 9, 17)</b>   |
| BatchNorm2d_3 (256)                                                       | (256, 9, 17)          |
| Conv2d_3 (512, kernel_size = [2,5], stride = [1,1], padding = 'same')     | (512, 9, 17)          |
| <b>ReLU_3</b>                                                             | <b>(512, 9, 17)</b>   |
| Conv2d_4 (1024, kernel_size = [2,5], stride = [1,1], padding = 'same')    | (1,024, 9, 17)        |
| <b>ReLU_4</b>                                                             | <b>(1,024, 9, 17)</b> |
| Conv2d_5 (512, kernel_size = [2,5], stride = [1,1], padding = 'same')     | (512, 9, 17)          |
| <b>ReLU_5</b>                                                             | <b>(512, 9, 17)</b>   |
| <b>AvgPool_1 (kernel_size = [2,5], stride = [2,2], padding = 'same')</b>  | <b>(512, 5, 9)</b>    |
| Linear_1                                                                  | (4,096)               |
| <b>ReLU_6</b>                                                             | <b>(4,096)</b>        |
| <b>Dropout_1 (p = 0.5)</b>                                                | <b>(4,096)</b>        |
| Linear_2                                                                  | (num_classes)         |

<https://doi.org/10.1371/journal.pbio.3002366.t012>

**CochResNet50 architecture.** The CochResNet50 model is composed of a ResNet50 backbone architecture applied to a cochleagram representation (with 2D convolutions applied to the cochleagram). Along with CochCNN9, this architecture was used for task optimization comparisons throughout the paper.

The CochResNet50 architecture is in Table 13 with the sizes of the tensors propagated through the network denoted in parentheses. Model stages that were used for voxel and component response modeling are denoted in bold, and num\_classes corresponds to the number of logits used for training each task (Table 1). The ResNetBlock components of the architecture are reported in Table 14.

Thus, for CochResNet50, we extracted model representations from the following 8 layers with the number of unit activations (regressors) for each sound denoted in parentheses:

**Table 13. CochResNet50 architecture.**

|                                                                                 |                        |
|---------------------------------------------------------------------------------|------------------------|
| Input (cochleagram)                                                             | (1,211,390)            |
| Conv2d_1(1, 64, kernel_size = 7, stride = 2, padding = 3, bias = False)         | (64, 106, 195)         |
| BatchNorm2d_1 [64]                                                              | (64, 106, 195)         |
| <b>ReLU_1</b>                                                                   | <b>(64, 106, 195)</b>  |
| <b>MaxPool2d_1(kernel_size = 3, stride = 2, padding = 1)</b>                    | [64, 53, 98]           |
| <b>ResNetBlock_1(inplanes = 64, planes = 64, num_blocks = 3, stride = 1)</b>    | <b>(256, 53, 98)</b>   |
| <b>ResNetBlock_2(inplanes = 256, planes = 128, num_blocks = 4, stride = 2)</b>  | <b>(512, 27, 49)</b>   |
| <b>ResNetBlock_3(inplanes = 512, planes = 256, num_blocks = 6, stride = 2)</b>  | <b>(1,024, 14, 25)</b> |
| <b>ResNetBlock_4(inplanes = 1024, planes = 512, num_blocks = 3, stride = 2)</b> | <b>(2,048, 7, 13)</b>  |
| AvgPool_1                                                                       | (2,048, 1, 1)          |
| Linear_1                                                                        | (num_classes)          |

<https://doi.org/10.1371/journal.pbio.3002366.t013>

**Table 14. CochResNet50 block components.**

|                                                                                                                              |
|------------------------------------------------------------------------------------------------------------------------------|
| 1. input (x)                                                                                                                 |
| 2. $1 \times 1$ Conv2d(inplanes, planes, stride = 1)                                                                         |
| 3. BatchNorm2d(planes)                                                                                                       |
| 4. ReLU                                                                                                                      |
| 5. $3 \times 3$ Conv2d (planes, planes, stride = 1)                                                                          |
| 6. BatchNorm2d(planes)                                                                                                       |
| 7. ReLU                                                                                                                      |
| 8. $1 \times 1$ Conv2d (planes, planes * expansion, stride = 1)                                                              |
| 9. BatchNorm2d(planes)                                                                                                       |
| 10. Residual connection on x (if inplanes! = planes * expansion): $1 \times 1$ Conv2D (inplanes, planes * expansion, stride) |
| 11. Residual connection on x (if inplanes! = planes * expansion): BatchNorm2d(planes * expansion)                            |
| 12. Add output from [9] to output from [11]                                                                                  |
| 13. (Output) ReLU                                                                                                            |

Multiple of these residual blocks (num\_blocks) are stacked together to form a single ResNetBlock. The expansion factor was set to 4 for all layers (expansion = 4).

<https://doi.org/10.1371/journal.pbio.3002366.t014>

Cochleagram (211), ReLU\_1 (6,784), MaxPool\_1 (3,392), ResNetBlock\_1 (13,568), ResNetBlock\_2 (13,824), ResNetBlock\_3 (14,336), ResNetBlock\_4 (14,336), AvgPool\_1 (2,048).

**Training dataset for CochCNN9 and CochResNet50 models—Word, Speaker, and AudioSet tasks.** Eight in-house models were trained on the Word-Speaker-Noise dataset. This dataset was first presented in Feather and colleagues' article [25] and was constructed from existing speech recognition and audio event classification datasets. The dataset description that follows is reproduced from Feather and colleagues' article [27] with some additions to further detail the speaker and audio event recognition tasks.

The dataset was approximately balanced to enable performance of 3 tasks on the same training exemplar: (1) recognition of the word at the center of a 2-second speech clip; (2) recognition of the speaker; and (3) recognition of audio events that were superimposed with the speech clips (serving as “background noise” for the speech tasks while enabling an audio event recognition task).

The speech clips used in the dataset were excerpted from the Wall Street Journal [169] (WSJ) and Spoken Wikipedia Corpora [170] (SWC). To choose speech clips, we screened WSJ, TIMIT [171], and a subset of articles from SWC for appropriate audio clips (specifically, clips that contained a word at least 4 characters long and that had 1 second of audio before the beginning of the word and after the end of the word, to enable the temporal jittering augmentation described below). Some SWC articles were left out of the screen due to (a) potentially offensive content for human listening experiments (29/1,340 clips); (b) missing data (35/1,340 clips); or (c) bad audio quality (for example, due to computer-generated voices of speakers reading the article or the talker changing midway through the clip (33/1,340 clips). Each segment was assigned the word class label of the word overlapping the segment midpoint and a speaker class label determined by the speaker. With the goal of constructing a dataset with speaker and word class labels that were approximately independent, we selected words and speaker classes such that the exemplars from each class spanned at least 50 unique cross-class labels (for instance, 50 unique speakers for each of the word classes). This exclusion fully removed TIMIT from the training dataset. We then selected words and speaker classes that each contained at least 200 unique utterances, and such that each class could contain a maximum of 25% of a single cross-class label (for instance, for a given word class, a maximum of

25% of utterances could come from the same speaker). These exemplars were subsampled so that the maximum number in any word or speaker class was less than 2,000. The resulting training dataset contained 230,356 unique clips in 793 word classes and 432 speaker classes, with 40,650 unique clips in the test set. Each word class had between 200 and 2,000 unique exemplars. A “null” class was used as a label for the word and speaker when a background clip was presented without the added speech.

The audio event clips that were superimposed on the speech clips were a subset of examples from the “Unbalanced Train” split of the AudioSet dataset (a set of annotated YouTube video soundtracks) [55]. To minimize ambiguity for the 2 speech tasks, we removed any sounds under the “Speech” or “Whispering” branch of the AudioSet ontology. Since a high proportion of AudioSet clips contain music, we achieved a more balanced set by excluding any clips that were only labeled with the root label of “Music,” with no specific branch labels. We also removed silent clips by first discarding everything tagged with a “Silence” label and then culling clips containing more than 10% zeros. This screening resulted in a training set of 718,625 unique natural sound clips spanning 516 categories. Each AudioSet clip was a maximum of 10 seconds long, from which a 2-second excerpt was randomly cropped during training (see below). A “null” audio event label was used as a label when speech clips were presented without added background sound.

During training, the speech clips from the Word-Speaker-Noise dataset were randomly cropped in time and superimposed on random crops of the AudioSet clips. Data augmentations during training consisted of (1) randomly selecting a clip from the prescreened AudioSet clips to pair with each labeled speech clip; (2) randomly cropping 2 seconds of the AudioSet clip and 2 seconds of the speech clip, cropped such that the labeled word remained in the center of the clip (due to training pipeline technicalities, we used a preselected set of 5,810,600 paired speech and natural sound crops that spanned 25 epochs of the full set of speech clips and 8 passes through the full set of AudioSet clips); (3) superimposing the speech and the noise (i.e., the AudioSet crop) with a signal-to-noise ratio (SNR) sampled from a uniform distribution between  $-10$  dB SNR and  $10$  dB SNR, augmented with additional samples of speech without an AudioSet background (i.e., with infinite SNR, 2,464 examples in each epoch) and samples of AudioSet without speech (i.e., with negative infinite SNR, 2,068 examples in each epoch); and (4) setting the RMS amplitude of the resulting signal to 0.1. By constructing the dataset in this way, we could train networks on different tasks while using the same dataset and training and test augmentations.

Evaluation performance for the word and speaker recognition tasks was measured from one pass through the speech test set (i.e., one crop from each of the 40,650 unique test set speech clips) constructed with the same augmentations used during training (specifically, variable SNR and temporal crops, paired with a set of AudioSet test clips from the “Balanced Train” split, same random seed used to test each model such that test sets were identical across models).

The representation from the AudioSet-trained models were evaluated with a support vector machine (SVM) fit to the ESC-50 dataset [172], composed of 50 types of environmental sounds. After the model was trained, and for each of the 5 folds in ESC-50, an SVM was fit to the output representation of the top of the layer immediately before the final linear layer (Avg-Pool\_1 for CochResNet50 and ReLU\_6 for CochCNN9). Each fold had 400 sounds, resulting in 1,600 sounds used for training when holding out each fold. As the networks were trained with 2-second-long sound clips, we took random 2-second crops of the ESC-50 sounds. For each sound in the training and test data, we took 5 two-second-long crops at random from the 5-second sound (randomly selecting a new crop if the chosen crop was all zeros). The 5 crops of the training data were all used in fitting the SVM, treated as separate training data points.

After the predictions were measured for the 5 crops for each test sound, we chose the label that was predicted most often as the prediction for the test sound.

The SVM was implemented with sklearn's LinearSVC, with cross validation over 5 regularization parameters ( $C = [0.01, 0.1, 1.0, 10.0, 100.0]$ ). For cross validation, a random selection of 25% of the training sounds were held out, and the SVM was fit on the other 75% of the sounds, and this was repeated 3 times (the 5 crops from a given sound were never split up between cross validation training and test splits, such that the cross-validation tested for generalization to held-out sounds). This cross-validation strategy is independent of the held-out test fold, as it only relies on the training dataset. A best regularization parameter was determined by choosing the parameter that resulted in the maximum percent correct averaged across the 3 splits, and we refit the SVM using the selected regularization parameter on the entire training dataset of 1,600 sounds to measure the performance on the held-out fold (400 sounds). The reported performance is the average across the 5 folds of the ESC-50 dataset.

**Training CochCNN9 and CochResNet50 models—Word, Speaker, and AudioSet tasks.** Each audio model was trained for 150 epochs of the speech dataset (corresponding to 48 epochs of the AudioSet training data). The learning rate was decreased by a factor of 10 after every 50 speech epochs (16 AudioSet epochs). All models were trained on the OpenMind computing cluster at MIT using NVIDIA GPUs.

The Word and Speaker networks were trained with a cross entropy loss on the target labels. Because the AudioSet dataset has multiple labels per clip, the logits are passed through a sigmoid and the Binary Cross Entropy is used as the loss function. Models had weight decay of  $1e-4$ , except for models trained on the AudioSet task (including the multitask models) which had weight decay of 0.

Both of the CochResNet50 and CochCNN9 architectures were trained simultaneously on all 3 tasks by including 3 fully connected layers as the final readout. These models were optimized by adding together a weighted loss from each individual task and minimizing this summed loss. The weights used for the loss function were 1.0 (Word), 0.25 (Speaker), and 300 (AudioSet).

Additional training details are given in [Table 15](#).

**Training dataset for CochCNN9 and CochResNet50 models—Musical genre task.** The genre task was the 41-way classification task introduced by Kell and colleagues [31]. The sounds and labels were derived from The Million Song Dataset [155]. Genre labels were obtained from user-generated “tags” from the MusicBrainz open-source music encyclopedia (<https://musicbrainz.org/>). Tags were first culled to eliminate those that did not apply to at least 10 different artists or that did not obviously correspond to a genre. These tags were then grouped into genre classes using hierarchical clustering applied to the tag co-occurrence matrix, grouping together tags that overlapped substantially. See Table S2 from Kell and colleagues' article [31] for a list of genres and the tags associated with each genre.

Training exemplars for the genre task were obtained by randomly excerpting 2-second clips from the tracks that had tags for the genre labels selected for the task. The music excerpts were superimposed with 2-second excerpts of one of 4 different background noises: (1) auditory scenes; (2) 2-speaker speech babble; (3) 8-speaker speech babble; or (4) music-shaped noise. Music-shaped noise consisted of a 2-second clip of noise that was matched to the average spectrum of its corresponding 2-second clip of music. SNRs were selected to yield performance in human listeners that was below ceiling (but above chance). The mean SNR for each of the 4 background types was 12 dB, with the SNR for each training example drawn randomly from a Gaussian with a standard deviation of 2 dB. All waveforms were downsampled to 16 kHz.

**Training CochCNN9 and CochResNet50 models—Musical genre task.** The genre networks were trained with a cross entropy loss, and a stochastic gradient descent optimizer was used for training with weight decay of  $1e-4$ , momentum of 0.9, and an initial learning rate of



Table 15. Training details for CochCNN9 and CochResNet50 models.

| Model Name             | Batch Size | Initial Learning Rate | Num Classes (includes “null”)                          | Accuracy on Training Task                                                                                                  |
|------------------------|------------|-----------------------|--------------------------------------------------------|----------------------------------------------------------------------------------------------------------------------------|
| CochCNN9 Word          | 128        | 0.01                  | 794                                                    | (Top 1) 66.640%<br>(Top 5) 83.102%                                                                                         |
| CochCNN9 Speaker       | 128        | 0.01                  | 433                                                    | (Top 1) 96.216%<br>(Top 5) 99.058%                                                                                         |
| CochCNN9 AudioSet      | 128        | 0.00001*              | 517                                                    | (ESC-50 SVM) 83.60%                                                                                                        |
| CochCNN9 MultiTask     | 128        | 0.00001*              | Three tasks: (Word) 794, (Speaker) 433, (AudioSet) 517 | (Top 1 Word) 64.954%<br>(Top 5 Word) 81.998%<br>(Top 1 Speaker) 86.686%<br>(Top 5 Speaker) 96.039%<br>(ESC-50 SVM) 82.60%  |
| CochResNet50 Word      | 256        | 0.1                   | 794                                                    | (Top 1) 86.792%<br>(Top 5) 95.149%                                                                                         |
| CochResNet50 Speaker   | 256        | 0.1                   | 433                                                    | (Top 1) 99.114%<br>(Top 5) 99.835%                                                                                         |
| CochResNet50 AudioSet  | 256        | 0.001*                | 517                                                    | (ESC-50 SVM) 91.6%                                                                                                         |
| CochResNet50 MultiTask | 256        | 0.001*                | Three tasks: (Word) 794, (Speaker) 433, (AudioSet) 517 | (Top 1 Word) 83.459%<br>(Top 5 Word) 93.422%<br>(Top 1 Speaker) 94.354%<br>(Top 5 Speaker) 98.785%<br>(ESC-50 SVM) 87.450% |

\*Models trained with the AudioSet loss had additional gradient clipping ( $\max l_2 \text{ norm} = 1.0$ ) and learning rate warm-up for the first 500 batches of training (learning rate =  $\langle \text{initial learning rate} \rangle / (500-i)$ , where  $i$  is the batch number).

<https://doi.org/10.1371/journal.pbio.3002366.t015>

0.01. The models were trained for 125 epochs of the genre dataset, and the learning rate was dropped by a factor of 10 after every 50 epochs. A batch size of 64 was used for training. The CochCNN9 architecture achieved Top 1 accuracy of 83.21% and Top 5 of 96.19% on the musical genre task, and the CochResNet50 model achieved Top 1 accuracy of 87.99% and Top 5 accuracy of 97.56%.

**Models trained on clean speech.** Models trained on clean speech used the speech clips from the Word-Speaker-Noise dataset [25] without using the associated AudioSet backgrounds. Data augmentations during training consisted of (1) pseudorandomly selecting a labeled speech clip as in the original dataset; (2) randomly cropping 2 seconds of the speech clip, cropped such that the labeled word remained in the center of the clip; and (3) setting the RMS amplitude of the resulting signal to 0.1. Each clean speech model was trained for 150 epochs of the speech dataset. The learning rate was decreased by a factor of 10 after every 50 speech epochs. All models were trained on the OpenMind computing cluster at MIT using NVIDIA GPUs. The Word and Speaker networks were trained with a cross entropy loss on the target labels.

Evaluation performance for the word and speaker recognition tasks was measured from one pass through the speech test set (i.e., one crop from each of the 40,650 unique test set speech clips) constructed with the 2-second temporal crop and RMS normalization used during training (same random seed used to test each model such that test sets were identical across models). Additional details of model training and performance are given in Table 16.

### Candidate models with permuted weights

In addition to the trained networks, we also analyzed “permuted” versions of the models with the exact same architecture as the trained models. We created these models by replacing all parameters making up the trained model in each network by random permutations across all

**Table 16. Training details for CochCNN9 and CochResNet50 models trained on clean speech.**

| Model Name                 | Batch Size | Initial Learning Rate | Num Classes (this number is inclusive of the “null” label, although no “null” examples were included when training clean models) | Accuracy on Clean Speech for Training Task |
|----------------------------|------------|-----------------------|----------------------------------------------------------------------------------------------------------------------------------|--------------------------------------------|
| CochCNN9 Word              | 128        | 0.01                  | 794                                                                                                                              | (Top 1) 82.311%<br>(Top 5) 94.150%         |
| CochCNN9 WordClean         | 128        | 0.01                  | 794                                                                                                                              | (Top 1) 84.365%<br>(Top 5) 95.078%         |
| CochCNN9 Speaker           | 128        | 0.01                  | 433                                                                                                                              | (Top 1) 99.799%<br>(Top 5) 99.990%         |
| CochCNN9 SpeakerClean*     | 128        | 0.01                  | 433                                                                                                                              | (Top 1) 99.905%<br>(Top 5) 99.998%         |
| CochResNet50 Word          | 256        | 0.1                   | 794                                                                                                                              | (Top 1) 94.212%<br>(Top 5) 98.993%         |
| CochResNet50 WordClean     | 256        | 0.1                   | 794                                                                                                                              | (Top 1) 93.998%<br>(Top 5) 98.662%         |
| CochResNet50 Speaker       | 256        | 0.1                   | 433                                                                                                                              | (Top 1) 99.973%<br>(Top 5) 100.000%        |
| CochResNet50 Speaker Clean | 256        | 0.1                   | 433                                                                                                                              | (Top 1) 99.988%<br>(Top 5) 100.000%        |

\*Model had additional gradient clipping (max  $l_2$  norm = 1.0) and learning rate warm-up for the first 500 batches of training (learning rate = <initial learning rate> / (500-i), where i is the batch number).

<https://doi.org/10.1371/journal.pbio.3002366.t016>

tensor dimensions within a given parameter block (for instance, a weight or bias matrix) for each model stage. This model manipulation destroyed the parameter structure learned during task optimization, while preserving the marginal statistics of the parameters. All analyses procedures were identical for trained and permuted networks.

## Supporting information

**S1 Fig. Representational dissimilarity matrices for fMRI voxels in (A) NH2015 and (B) B2021.** For visualization purposes, the RDMs are computed as 1 minus the Pearson correlation coefficient between the 3-scan average BOLD responses for pairs of sounds. RDMs are computed for all sound-responsive voxels (left) and using only a subset of voxels for each of the anatomical ROIs (right). Sounds are grouped by sound categories (included in colors on the axis). Data and code with which to reproduce results are available at [https://github.com/gretatuckute/auditory\\_brain\\_dnn](https://github.com/gretatuckute/auditory_brain_dnn). (PDF)

**S2 Fig. Median variance explained across model stages for each model.** Explained variance was measured for each voxel, and the aggregated median variance explained across all voxels in auditory cortex was obtained. This aggregated median variance explained is plotted for all candidate models ( $n = 19$ ) for both fMRI datasets. The model plots are sorted according to overall model performance (median noise-corrected  $R^2$  for NH2015 in Fig 2A in the main text), meaning that the first subplot shows the best-performing model, CochResNet50-Multi-Task, and the last subplot shows the worst-performing model, MetricGAN. Dark lines show the trained networks, and lighter lines show the control networks with permuted weights. Error bars are within-participant SEM. Error bars are smaller for the B2021 dataset because of the larger number of participants ( $n = 20$  vs.  $n = 8$ ). We note that some of the variation in predictivity across model stages in the models with permuted weights could be driven by the receptive field sizes at different stages, which are partly a function of the model architecture. Data and code with which to reproduce results are available at <https://github.com/>

[gretatuckute/auditory\\_brain\\_dnn](https://github.com/gretatuckute/auditory_brain_dnn).

(TIF)

**S3 Fig. Comparison of component variance explained by in-house models trained from different random seeds.** We trained the in-house models from 2 different random seeds. The variance explained for the first seed is plotted on the x-axis and for the second seed on the y-axis. Each data point represents a model using with the same color correspondence as in Fig 2 in the main text. Variance explained was obtained from the best-predicting stage of each model for each component, selected using independent data. Error bars are SEM over iterations of the model stage selection procedure (see Methods; Component modeling). Data and code with which to reproduce results are available at [https://github.com/gretatuckute/auditory\\_brain\\_dnn](https://github.com/gretatuckute/auditory_brain_dnn).

(TIF)

**S4 Fig. Surface maps of best-predicting model stage for trained models.** The figure shows surface maps for trained models that are not included in Fig 6A in the main text (which featured the  $n = 8$  best-predicting models, leaving the  $n = 11$  models shown here). The plots are sorted according to overall model predictivity (the quantity plotted in Fig 2A in the main text). As in Fig 6A in the main text, the plots show the model stage that best predicts each voxel as a surface map (FsAverage) (median best stage across participants). We assigned each model stage a position index between 0 and 1. The color scale limits were set to extend from 0 to the stage beyond the most common best stage (across voxels). Data and code with which to reproduce results are available at [https://github.com/gretatuckute/auditory\\_brain\\_dnn](https://github.com/gretatuckute/auditory_brain_dnn).

(TIF)

**S5 Fig. Surface maps of best-predicting model stage for permuted control models.** Panel A shows the surface maps for the 8 models shown in Fig 6A in the main text, but with permuted weights. Panel B shows surface maps for models with permuted weights that are not included in Fig 6A in the main text. Identical analyses procedures and color scale limits were used for the permuted models as for the trained ones. Data and code with which to reproduce results are available at [https://github.com/gretatuckute/auditory\\_brain\\_dnn](https://github.com/gretatuckute/auditory_brain_dnn).

(TIF)

**S6 Fig. Median variance explained by each model stage of each model for different auditory ROIs.** Explained variance was measured for each voxel, and the aggregated median variance explained across each of the 4 anatomical ROIs (primary, anterior, lateral, posterior) was obtained. This aggregated median variance explained is plotted for all stages of all candidate models ( $n = 19$ ) for both fMRI datasets. The model plots are sorted according to overall model predictivity (median noise-corrected  $R^2$  for NH2015 in Fig 2A in the main text; same model order as in S2 Fig). Error bars are within-participant SEM. Error bars are smaller for the B2021 dataset because of the larger number of participants (20 vs. 8). Data and code with which to reproduce results are available at [https://github.com/gretatuckute/auditory\\_brain\\_dnn](https://github.com/gretatuckute/auditory_brain_dnn).

(TIF)

**S7 Fig. Stage-region correspondence of permuted models.** This figure mirrors Fig 7 in the main text, which shows the quantification of model-stage-region correspondence across trained models. (A) As in Fig 7 in the main text, we obtained the median best-predicting stage for each model within 4 anatomical ROIs (illustrated in Fig 7A, main text): primary auditory cortex (x-axis in each plot in panels A and B) and anterior, lateral, and posterior non-primary regions (y-axes in panels A and B). We performed the analysis on each of the 2 fMRI data sets, including each model that outperformed the baseline model in Fig 2A in the main text ( $n = 15$

models). Each data point corresponds to a model with permuted weights, with the same color correspondence as in Fig 2 in the main text. None of the 6 possible comparisons (2 datasets  $\times$  3 non-primary ROIs) were statistically significant even without correction for multiple comparisons,  $p > 0.16$  in all cases (Wilcoxon signed rank tests, two-tailed). **(B)** Same analysis as panel A but with the best-matching model stage determined by correlations between the model and ROI representational dissimilarity matrices. None of the 6 possible comparisons were statistically significant even without correction for multiple comparisons,  $p > 0.07$  in all cases (Wilcoxon signed rank tests, two-tailed). Data and code with which to reproduce results are available at [https://github.com/gretatuckute/auditory\\_brain\\_dnn](https://github.com/gretatuckute/auditory_brain_dnn).

(TIF)

**S8 Fig. Component response variance explained by models trained with and without background noise.** **(A)** Variance explained was obtained from the best-predicting stage of each model for each component, selected using independent data. Models trained in the presence of background noise are shown in the same color scheme as in Fig 2 in the main text; models trained with clean speech are shown with hashing. Grey line shows variance explained by the SpectroTemporal baseline model. Error bars are SEM over iterations of the model stage selection procedure (see Methods; Component modeling). **(B)** We trained the models from 2 different random seeds. The variance explained for the first seed is plotted on the x-axis and for the second seed on the y-axis. Each data point represents a model. Data and code with which to reproduce results are available at [https://github.com/gretatuckute/auditory\\_brain\\_dnn](https://github.com/gretatuckute/auditory_brain_dnn).

(TIF)

**S9 Fig. Effective dimensionality in relation to model-brain similarity metrics.** **(A)** Effective dimensionality and regression-based model-brain similarity metric (voxelwise modeling). Panel **i** shows the consistency of the model evaluation metric (median noise-corrected  $R^2$ ) between the 2 datasets analyzed in the paper (NH2015 and B2021). The consistency between datasets provides a ceiling for the strength of the relationship shown in panel **ii**. Panel **ii** shows the relationship between the model evaluation metric (median noise-corrected  $R^2$ ) and effective dimensionality (computed as described in Methods; Effective dimensionality). Each data point corresponds to a model stage, with the same color correspondence as in Fig 2 in the main text. **(B)** Same analysis as **(A)** but with the representational similarity analysis evaluation metric (median Spearman correlation between the model and fMRI representational dissimilarity matrices). All unique models in the study were included in this analysis ( $n = 20$  models in Fig 2 in the main text plus  $n = 4$  models trained on the word and speaker tasks without background noise from Fig 8 in the main text, i.e.,  $n = 24$  models in total). Data and code with which to reproduce results are available at [https://github.com/gretatuckute/auditory\\_brain\\_dnn](https://github.com/gretatuckute/auditory_brain_dnn).

(TIF)

**S10 Fig. Consistency between regression and representational similarity model-brain similarity metrics.** **(A)** Correlation between the regression-based metric (median noise-corrected  $R^2$ ) and the representational similarity metric (median Spearman correlation) across trained network stages for the NH2015 and B2021 datasets. Each data point corresponds to a network stage, with the same color correspondence as in Fig 2 in the main text. **(B)** Same as panel A, but for permuted network stages. All unique models in the study were included in this analysis ( $n = 20$  models in Fig 2 in the main text plus  $n = 4$  models trained on the word and speaker tasks without background noise from Fig 8 in the main text, i.e.,  $n = 24$  models in total). Data and code with which to reproduce results are available at [https://github.com/gretatuckute/auditory\\_brain\\_dnn](https://github.com/gretatuckute/auditory_brain_dnn).

(TIF)

**S1 Table. Natural sound stimulus set.** List of all 165 sounds presented to human listeners while in the fMRI machine. Category assignments were based on judgments of human subjects on Amazon Mechanical Turk. Source data originally published in [50].

(TIFF)

## Acknowledgments

We thank Ian Griffith for training the music genre classification models, Alex Kell for helpful discussions, Nancy Kanwisher for sharing fMRI data, developers for making their trained models available for public use, and the McDermott lab for comments on an earlier draft of the paper.

## Author Contributions

**Conceptualization:** Greta Tuckute, Jenelle Feather, Josh H. McDermott.

**Funding acquisition:** Josh H. McDermott.

**Investigation:** Greta Tuckute, Jenelle Feather.

**Methodology:** Greta Tuckute, Jenelle Feather, Josh H. McDermott.

**Project administration:** Josh H. McDermott.

**Resources:** Dana Boebinger, Josh H. McDermott.

**Supervision:** Josh H. McDermott.

**Writing – original draft:** Greta Tuckute, Jenelle Feather, Dana Boebinger, Josh H. McDermott.

**Writing – review & editing:** Greta Tuckute, Jenelle Feather, Dana Boebinger, Josh H. McDermott.

## References

1. Lehky SR, Sejnowski TJ. Network model of shape-from-shading: neural function arises from both receptive and projective fields. *Nature*. 1988 Jun; 333(6172):452–454. <https://doi.org/10.1038/333452a0> PMID: 3374585
2. Zipser D, Andersen RA. A back-propagation programmed network that simulates response properties of a subset of posterior parietal neurons. *Nature*. 1988 Feb; 331(6158):679–684. <https://doi.org/10.1038/331679a0> PMID: 3344044
3. Marblestone AH, Wayne G, Kording KP. Toward an integration of deep learning and neuroscience. *Front Comput Neurosci* [Internet]. 2016 Sep 14 [cited 2022 Feb 8]; 10. Available from: <http://journal.frontiersin.org/Article/10.3389/fncom.2016.00094/abstract> PMID: 27683554
4. Richards BA, Lillicrap TP, Beaudoin P, Bengio Y, Bogacz R, Christensen A, et al. A deep learning framework for neuroscience. *Nat Neurosci*. 2019 Nov; 22(11):1761–1770. <https://doi.org/10.1038/s41593-019-0520-2> PMID: 31659335
5. Kell AJE, McDermott JH. Deep neural network models of sensory systems: windows onto the role of task constraints. *Curr Opin Neurobiol*. 2019 Apr; 55:121–132. <https://doi.org/10.1016/j.conb.2019.02.003> PMID: 30884313
6. Storrs KR, Kriegeskorte N. Deep Learning for Cognitive Neuroscience. 2020 [cited 2023 Aug 31]. Available from: <https://direct.mit.edu/books/edited-volume/5456/chapter/3967020/Deep-Learning-for-Cognitive-Neuroscience>
7. Schrimpf M, Kubilius J, Lee MJ, Ratan Murty NA, Ajemian R, DiCarlo JJ. Integrative benchmarking to advance neurally mechanistic models of human intelligence. *Neuron*. 2020; 108(3):413–423. <https://doi.org/10.1016/j.neuron.2020.07.040> PMID: 32918861
8. Saxe A, Nelli S, Summerfield C. If deep learning is the answer, what is the question? *Nat Rev Neurosci*. 2021 Jan; 22(1):55–67. <https://doi.org/10.1038/s41583-020-00395-8> PMID: 33199854

9. Lake BM, Zaremba W, Fergus R, Gureckis TM. Deep neural networks predict category typicality ratings for images. *Cogn Sci*. 2015 Jul; 6.
10. Peterson JC, Abbott JT, Griffiths TL. Evaluating (and improving) the correspondence between deep neural networks and human representations. *Cogn Sci*. 2018; 42(8):2648–2669. <https://doi.org/10.1111/cogs.12670> PMID: 30178468
11. King ML, Groen IIA, Steel A, Kravitz DJ, Baker CI. Similarity judgments and cortical visual responses reflect different properties of object and scene categories in naturalistic images. *NeuroImage*. 2019 Aug; 197:368–382. <https://doi.org/10.1016/j.neuroimage.2019.04.079> PMID: 31054350
12. Jang H, McCormack D, Tong F. Noise-trained deep neural networks effectively predict human vision and its neural responses to challenging images. Summerfield C, editor. *PLOS Biol*. 2021 Dec 9; 19(12):e3001418.
13. Yamins DLK, Hong H, Cadieu CF, Solomon EA, Seibert D, DiCarlo JJ. Performance-optimized hierarchical models predict neural responses in higher visual cortex. *Proc Natl Acad Sci*. 2014 Jun 10; 111(23):8619–8624. <https://doi.org/10.1073/pnas.1403112111> PMID: 24812127
14. Guclu U, van Gerven MAJ. Deep neural networks reveal a gradient in the complexity of neural representations across the ventral stream. *J Neurosci*. 2015 Jul 8; 35(27):10005–10014. <https://doi.org/10.1523/JNEUROSCI.5023-14.2015> PMID: 26157000
15. Cichy RM, Khosla A, Pantazis D, Torralba A, Oliva A. Comparison of deep neural networks to spatio-temporal cortical dynamics of human visual object recognition reveals hierarchical correspondence. *Sci Rep*. 2016 Sep; 6(1):27755. <https://doi.org/10.1038/srep27755> PMID: 27282108
16. Eickenberg M, Gramfort A, Varoquaux G, Thirion B. Seeing it all: Convolutional network layers map the function of the human visual system. *NeuroImage*. 2017 May; 152:184–194. <https://doi.org/10.1016/j.neuroimage.2016.10.001> PMID: 27777172
17. Biggio B, Corona I, Maiorca D, Nelson B, Šrđić N, Laskov P, et al. Evasion Attacks against Machine Learning at Test Time. In: Blockeel H, Kersting K, Nijssen S, Železný F, editors. *Machine Learning and Knowledge Discovery in Databases*. Berlin, Heidelberg: Springer; 2013. p. 387–402. (Lecture Notes in Computer Science).
18. Szegedy C, Zaremba W, Sutskever I, Bruna J, Erhan D, Goodfellow IJ, et al. Intriguing properties of neural networks. *2nd International Conference on Learning Representations, ICLR 2014, Banff, AB, Canada, April 14–16, 2014, Conference Track Proceedings* [Internet]. 2014 [cited 2023 Aug 31]. Available from: <http://arxiv.org/abs/1312.6199>
19. Nguyen A, Yosinski J, Clune J. Deep neural networks are easily fooled: High confidence predictions for unrecognizable images. 2015 IEEE Conference on Computer Vision and Pattern Recognition (CVPR). 2015. p. 427–436.
20. Carlini N, Wagner DA. Audio Adversarial Examples: Targeted Attacks on Speech-to-Text. 2018 IEEE Security and Privacy Workshops, SP Workshops 2018, San Francisco, CA, USA, May 24, 2018. IEEE Computer Society; 2018. p. 1–7.
21. Berardino A, Ballé J, Laparra V, Simoncelli EP. Eigen-Distortions of Hierarchical Representations. *Advances in Neural Information Processing Systems 30 (NIPS 2017)*. 2017.
22. Azulay A, Weiss Y. Why do deep convolutional networks generalize so poorly to small image transformations? *J Mach Learn Res*. 2019; 20:1–25.
23. Geirhos R, Temme CRM, Rauber J, Schütt HH, Bethge M, Wichmann FA. Generalisation in humans and deep neural networks. *Advances in Neural Information Processing Systems 31 (NeurIPS 2018)* [Internet]. 2018. Available from: [https://papers.nips.cc/paper\\_files/paper/2018/hash/0937fb5864ed06ffb59ae5f9b5ed67a9-Abstract.html](https://papers.nips.cc/paper_files/paper/2018/hash/0937fb5864ed06ffb59ae5f9b5ed67a9-Abstract.html)
24. Zhang R. Making Convolutional Networks Shift-Invariant Again. *Proceedings of the 36th International Conference on Machine Learning* [Internet]. 2019. Available from: <https://dblp.org/rec/journals/corr/abs-1904-11486.html>
25. Feather J, Durango A, Gonzalez R, McDermott JH. Metamers of neural networks reveal divergence from human perceptual systems. *Advances in Neural Information Processing Systems 32 (NeurIPS 2019)* [Internet]. 2019. Available from: <https://proceedings.neurips.cc/paper/2019/hash/ac27b77292582bc293a51055bfc994ee-Abstract.html>
26. Jacobsen JH, Behrmann J, Zemel RS, Bethge M. Excessive Invariance Causes Adversarial Vulnerability. 7th International Conference on Learning Representations, ICLR 2019, New Orleans, LA, USA, May 6–9, 2019 [Internet]. 2019 [cited 2023 Aug 31]. Available from: <https://openreview.net/forum?id=BkfbpsAcF7>
27. Feather J, Leclerc G, Mađry A, McDermott JH. Model metamers reveal divergent invariances between biological and artificial neural networks. *Nat Neurosci*. 2023 Oct 16; 1–18. <https://doi.org/10.1038/s41593-023-01442-0> PMID: 37845543

28. Jacob G, Pramod RT, Katti H, Arun SP. Qualitative similarities and differences in visual object representations between brains and deep networks. *Nat Commun.* 2021 Mar 25; 12(1):1872. <https://doi.org/10.1038/s41467-021-22078-3> PMID: 33767141
29. Geirhos R, Rubisch P, Michaelis C, Bethge M, Wichmann FA, Brendel W. ImageNet-trained CNNs are biased towards texture; increasing shape bias improves accuracy and robustness. 7th International Conference on Learning Representations, ICLR 2019, New Orleans, LA, USA, May 6–9, 2019 [Internet]. 2019 [cited 2023 Aug 31]. Available from: <https://openreview.net/forum?id=Bygh9j09KX>
30. Bowers JS, Malhotra G, Dujmović M, Montero ML, Tsvetkov C, Biscione V, et al. Deep Problems with Neural Network Models of Human Vision. *Behav Brain Sci.* 2022 Dec 1;1–74. <https://doi.org/10.1017/S0140525X22002813> PMID: 36453586
31. Kell AJE, Yamins DLK, Shook EN, Norman-Haignere SV, McDermott JH. A task-optimized neural network replicates human auditory behavior, predicts brain responses, and reveals a cortical processing hierarchy. *Neuron.* 2018 May; 98(3):630–644.e16. <https://doi.org/10.1016/j.neuron.2018.03.044> PMID: 29681533
32. Saddler MR, Gonzalez R, McDermott JH. Deep neural network models reveal interplay of peripheral coding and stimulus statistics in pitch perception. *Nat Commun.* 2021 Dec; 12(1):7278. <https://doi.org/10.1038/s41467-021-27366-6> PMID: 34907158
33. Francl A, McDermott JH. Deep neural network models of sound localization reveal how perception is adapted to real-world environments. *Nat Hum Behav.* 2022 Jan; 6(1):111–133. <https://doi.org/10.1038/s41562-021-01244-z> PMID: 35087192
34. Brochier T, Schlittenlacher J, Roberts I, Goehring T, Jiang C, Vickers D, et al. From microphone to phoneme: an end-to-end computational neural model for predicting speech perception with cochlear implants. *IEEE Trans Biomed Eng.* 2022; 69(11):3300–3312. <https://doi.org/10.1109/TBME.2022.3167113> PMID: 35417340
35. Millet J, Dunbar E. Do self-supervised speech models develop human-like perception biases? Proceedings of the 60th Annual Meeting of the Association for Computational Linguistics (Volume 1: Long Papers) [Internet]. Dublin, Ireland: Association for Computational Linguistics; 2022 [cited 2022 Aug 19]. p. 7591–605. Available from: <https://aclanthology.org/2022.acl-long.523>
36. Güçlü U, Thielen J, Hanke M, van Gerven MAJ. Brains on beats. *Advances in Neural Information Processing Systems 29 (NIPS 2016)*. 2016. p. 2109–2117.
37. Koumura T, Terashima H, Furukawa S. Cascaded tuning to amplitude modulation for natural sound recognition. *J Neurosci.* 2019 Jul 10; 39(28):5517–5533. <https://doi.org/10.1523/JNEUROSCI.2914-18.2019> PMID: 31092586
38. Khatami F, Escabí MA. Spiking network optimized for word recognition in noise predicts auditory system hierarchy. Cohen YE, editor. *PLoS Comput Biol.* 2020 Jun 19; 16(6):e1007558. <https://doi.org/10.1371/journal.pcbi.1007558> PMID: 32559204
39. Magnuson JS, You H, Luthra S, Li M, Nam H, Escabí M, et al. EARSHOT: a minimal neural network model of incremental human speech recognition. *Cogn Sci [Internet]*. 2020 Apr [cited 2022 Feb 8]; 44(4). Available from: <https://onlinelibrary.wiley.com/doi/10.1111/cogs.12823> PMID: 32274861
40. Millet J, King JR. Inductive biases, pretraining and fine-tuning jointly account for brain responses to speech. *ArXiv210301032 Cs Eess Q-Bio [Internet]*. 2021 Feb 25 [cited 2022 Feb 8]. Available from: <http://arxiv.org/abs/2103.01032>
41. Millet J, Caucheteux C, Orhan P, Boubenec Y, Gramfort A, Dunbar E, et al. Toward a realistic model of speech processing in the brain with self-supervised learning. *Advances in Neural Information Processing Systems 35 (NeurIPS 2022)*. 2022.
42. Vaidya AR, Jain S, Huth AG. Self-supervised models of audio effectively explain human cortical responses to speech. *Proceedings of the 39th International Conference on Machine Learning*. 2022.
43. Li Y, Anumanchipalli GK, Mohamed A, Chen P, Carney LH, Lu J, et al. Dissecting neural computations in the human auditory pathway using deep neural networks for speech. *Nat Neurosci.* 2023 Oct 30; 1–13. <https://doi.org/10.1038/s41593-023-01468-4> PMID: 37904043
44. Giordano BL, Esposito M, Valente G, Formisano E. Intermediate acoustic-to-semantic representations link behavioral and neural responses to natural sounds. *Nat Neurosci.* 2023 Apr; 26(4):664–672. <https://doi.org/10.1038/s41593-023-01285-9> PMID: 36928634
45. Chi T, Ru P, Shamma SA. Multiresolution spectrotemporal analysis of complex sounds. *J Acoust Soc Am.* 2005 Aug; 118(2):887–906. <https://doi.org/10.1121/1.1945807> PMID: 16158645
46. Naselaris T, Kay KN, Nishimoto S, Gallant JL. Encoding and decoding in fMRI. *NeuroImage.* 2011 May 15; 56(2):400–410. <https://doi.org/10.1016/j.neuroimage.2010.07.073> PMID: 20691790

47. Kriegeskorte N, Mur M, Bandettini P. Representational similarity analysis—connecting the branches of systems neuroscience. *Front Syst Neurosci* [Internet]. 2008 [cited 2022 Aug 19]; 2. Available from: <https://www.frontiersin.org/articles/10.3389/neuro.06.004.2008> PMID: 19104670
48. Kriegeskorte N, Kievit RA. Representational geometry: integrating cognition, computation, and the brain. *Trends Cogn Sci*. 2013 Aug; 17(8):401–412. <https://doi.org/10.1016/j.tics.2013.06.007> PMID: 23876494
49. Diedrichsen J, Kriegeskorte N. Representational models: A common framework for understanding encoding, pattern-component, and representational-similarity analysis. *PLoS Comput Biol*. 2017 Apr 24; 13(4):e1005508. <https://doi.org/10.1371/journal.pcbi.1005508> PMID: 28437426
50. Norman-Haignere SV, Kanwisher NG, McDermott JH. Distinct cortical pathways for music and speech revealed by hypothesis-free voxel decomposition. *Neuron*. 2015 Dec; 88(6):1281–1296. <https://doi.org/10.1016/j.neuron.2015.11.035> PMID: 26687225
51. Boebinger D, Norman-Haignere SV, McDermott JH, Kanwisher N. Music-selective neural populations arise without musical training. *J Neurophysiol*. 2021 Jun 1; 125(6):2237–2263. <https://doi.org/10.1152/jn.00588.2020> PMID: 33596723
52. Nayebi A, Bear D, Kubilius J, Kar K, Ganguli S, Sussillo D, et al. Task-Driven Convolutional Recurrent Models of the Visual System. *Advances in Neural Information Processing Systems 31 (NeurIPS 2018)* [Internet]. 2018 [cited 2023 Jun 9]. Available from: [https://proceedings.neurips.cc/paper\\_files/paper/2018/file/6be93f7a96fed60c477d30ae1de032fd-Paper.pdf](https://proceedings.neurips.cc/paper_files/paper/2018/file/6be93f7a96fed60c477d30ae1de032fd-Paper.pdf)
53. Kubilius J, Schrimpf M, Kar K, Rajalingham R, Hong H, Majaj N, et al. Brain-Like Object Recognition with High-Performing Shallow Recurrent ANNs. *Advances in Neural Information Processing Systems 32 (NeurIPS 2019)* [Internet]. 2019 [cited 2023 Jun 9]. Available from: [https://papers.nips.cc/paper\\_files/paper/2019/hash/7813d1590d28a7dd372ad54b5d29d033-Abstract.html](https://papers.nips.cc/paper_files/paper/2019/hash/7813d1590d28a7dd372ad54b5d29d033-Abstract.html)
54. He K, Zhang X, Ren S, Sun J. Deep residual learning for image recognition. *ArXiv151203385 Cs* [Internet]. 2015 Dec 10 [cited 2022 Feb 8]. Available from: <http://arxiv.org/abs/1512.03385>
55. Gemmeke JF, Ellis DPW, Freedman D, Jansen A, Lawrence W, Moore RC, et al. Audio Set: An ontology and human-labeled dataset for audio events. *2017 IEEE International Conference on Acoustics, Speech and Signal Processing (ICASSP)*. 2017. p. 776–780.
56. Santoro R, Moerel M, Martino FD, Goebel R, Ugurbil K, Yacoub E, et al. Encoding of natural sounds at multiple spectral and temporal resolutions in the human auditory cortex. *PLoS Comput Biol*. 2014 Jan 2; 10(1):e1003412. <https://doi.org/10.1371/journal.pcbi.1003412> PMID: 24391486
57. Norman-Haignere SV, McDermott JH. Neural responses to natural and model-matched stimuli reveal distinct computations in primary and nonprimary auditory cortex. *PLoS Biol*. 2018 Dec 3; 16(12):e2005127. <https://doi.org/10.1371/journal.pbio.2005127> PMID: 30507943
58. Huth AG, de Heer WA, Griffiths TL, Theunissen FE, Gallant JL. Natural speech reveals the semantic maps that tile human cerebral cortex. *Nature*. 2016 Apr; 532(7600):453–458. <https://doi.org/10.1038/nature17637> PMID: 27121839
59. Heer WA de, Huth AG, Griffiths TL, Gallant JL, Theunissen FE. The hierarchical cortical organization of human speech processing. *J Neurosci*. 2017 Jul 5; 37(27):6539–6557. <https://doi.org/10.1523/JNEUROSCI.3267-16.2017> PMID: 28588065
60. Pereira F, Lou B, Pritchett B, Ritter S, Gershman SJ, Kanwisher N, et al. Toward a universal decoder of linguistic meaning from brain activation. *Nat Commun*. 2018 Mar 6; 9(1):963. <https://doi.org/10.1038/s41467-018-03068-4> PMID: 29511192
61. Spearman C. The proof and measurement of association between two things. *Am J Psychol*. 1904 Jan; 15(1):72.
62. Schoppe O, Harper NS, Willmore BDB, King AJ, Schnupp JWH. Measuring the performance of neural models. *Front Comput Neurosci* [Internet]. 2016 Feb 10 [cited 2022 Feb 8]; 10. Available from: <http://journal.frontiersin.org/Article/10.3389/fncom.2016.00010/abstract> PMID: 26903851
63. Khaligh-Razavi SM, Kriegeskorte N. Deep supervised, but not unsupervised, models may explain it cortical representation. Diedrichsen J, editor. *PLoS Comput Biol*. 2014 Nov 6; 10(11):e1003915. <https://doi.org/10.1371/journal.pcbi.1003915> PMID: 25375136
64. Storrs KR, Kietzmann TC, Walther A, Mehrer J, Kriegeskorte N. Diverse deep neural networks all predict human inferior temporal cortex well, after training and fitting. *J Cogn Neurosci*. 2021 Aug 19; 1–21. [https://doi.org/10.1162/jocn\\_a\\_01755](https://doi.org/10.1162/jocn_a_01755) PMID: 34272948
65. Hamilton LS, Huth AG. The revolution will not be controlled: natural stimuli in speech neuroscience. *Lang Cogn Neurosci*. 2018 Jul 22; 35(5):573–582. <https://doi.org/10.1080/23273798.2018.1499946> PMID: 32656294



66. Xu Y, Vaziri-Pashkam M. Limits to visual representational correspondence between convolutional neural networks and the human brain. *Nat Commun.* 2021 Apr 6; 12(1):2065. <https://doi.org/10.1038/s41467-021-22244-7> PMID: 33824315
67. Glasser MF, Coalson TS, Robinson EC, Hacker CD, Harwell J, Yacoub E, et al. A multi-modal parcellation of human cerebral cortex. *Nature.* 2016 Aug; 536(7615):171–178. <https://doi.org/10.1038/nature18933> PMID: 27437579
68. Festen JM, Plomp R. Effects of fluctuating noise and interfering speech on the speech-reception threshold for impaired and normal hearing. *J Acoust Soc Am.* 1990 Oct 1; 88(4):1725–1736. <https://doi.org/10.1121/1.400247> PMID: 2262629
69. Assmann P, Summerfield Q. The Perception of Speech Under Adverse Conditions. In: Greenberg S, Ainsworth WA, Popper AN, Fay RR, editors. *Speech Processing in the Auditory System* [Internet]. New York, NY: Springer; 2004 [cited 2023 Jun 9]. p. 231–308. (Springer Handbook of Auditory Research). [https://doi.org/10.1007/0-387-21575-1\\_5](https://doi.org/10.1007/0-387-21575-1_5)
70. Ding N, Simon JZ. Adaptive Temporal Encoding Leads to a Background-Insensitive Cortical Representation of Speech. *J Neurosci.* 2013 Mar 27; 33(13):5728–5735. <https://doi.org/10.1523/JNEUROSCI.5297-12.2013> PMID: 23536086
71. Rabinowitz NC, Willmore BDB, King AJ, Schnupp JWH. Constructing Noise-Invariant Representations of Sound in the Auditory Pathway. *PLoS Biol.* 2013 Nov 12; 11(11):e1001710. <https://doi.org/10.1371/journal.pbio.1001710> PMID: 24265596
72. Moore RC, Lee T, Theunissen FE. Noise-invariant Neurons in the Avian Auditory Cortex: Hearing the Song in Noise. *PLoS Comput Biol.* 2013 Mar 7; 9(3):e1002942. <https://doi.org/10.1371/journal.pcbi.1002942> PMID: 23505354
73. Mesgarani N, David SV, Fritz JB, Shamma SA. Mechanisms of noise robust representation of speech in primary auditory cortex. *Proc Natl Acad Sci.* 2014 May 6; 111(18):6792–6797. <https://doi.org/10.1073/pnas.1318017111> PMID: 24753585
74. Kell AJE, McDermott JH. Invariance to background noise as a signature of non-primary auditory cortex. *Nat Commun.* 2019 Sep 2; 10(1):3958. <https://doi.org/10.1038/s41467-019-11710-y> PMID: 31477711
75. Khalighinejad B, Herrero JL, Mehta AD, Mesgarani N. Adaptation of the human auditory cortex to changing background noise. *Nat Commun.* 2019 Jun 7; 10(1):2509. <https://doi.org/10.1038/s41467-019-10611-4> PMID: 31175304
76. Weerts L, Rosen S, Clopath C, Goodman DFM. The Psychometrics of Automatic Speech Recognition [Internet]. *bioRxiv*; 2022 [cited 2023 Jun 9]. p. 2021.04.19.440438. Available from: <https://www.biorxiv.org/content/10.1101/2021.04.19.440438v3>
77. Adolphi F, Bowers JS, Poeppel D. Successes and critical failures of neural networks in capturing human-like speech recognition. *Neural Netw.* 2023 May; 162:199–211. <https://doi.org/10.1016/j.neunet.2023.02.032> PMID: 36913820
78. Lewicki MS. Efficient coding of natural sounds. *Nat Neurosci.* 2002 Apr; 5(4):356–363. <https://doi.org/10.1038/nn831> PMID: 11896400
79. Carlson NL, Ming VL, DeWeese MR. Sparse Codes for Speech Predict Spectrotemporal Receptive Fields in the Inferior Colliculus. *PLoS Comput Biol.* 2012 Jul 12; 8(7):e1002594. <https://doi.org/10.1371/journal.pcbi.1002594> PMID: 22807665
80. Młynarski W, McDermott JH. Learning Midlevel Auditory Codes from Natural Sound Statistics. *Neural Comput.* 2018 Mar 1; 30(3):631–669. [https://doi.org/10.1162/neco\\_a\\_01048](https://doi.org/10.1162/neco_a_01048) PMID: 29220308
81. Elmoznino E, Bonner MF. High-performing neural network models of visual cortex benefit from high latent dimensionality [Internet]. *bioRxiv*; 2022 [cited 2022 Aug 19]. p. 2022.07.13.499969. Available from: <https://www.biorxiv.org/content/10.1101/2022.07.13.499969v1>
82. Wessinger CM, VanMeter J, Tian B, Van Lare J, Pekar J, Rauschecker JP. Hierarchical organization of the human auditory cortex revealed by functional magnetic resonance imaging. *J Cogn Neurosci.* 2001 Jan 1; 13(1):1–7. <https://doi.org/10.1162/089892901564108> PMID: 11224904
83. Rauschecker JP, Scott SK. Maps and streams in the auditory cortex: nonhuman primates illuminate human speech processing. *Nat Neurosci.* 2009 Jun; 12(6):718–724. <https://doi.org/10.1038/nn.2331> PMID: 19471271
84. Okada K, Rong F, Venezia J, Matchin W, Hsieh IH, Saberi K, et al. Hierarchical organization of human auditory cortex: evidence from acoustic invariance in the response to intelligible speech. *Cereb Cortex N Y N 1991.* 2010 Oct; 20(10):2486–2495. <https://doi.org/10.1093/cercor/bhp318> PMID: 20100898
85. Liebenthal E, Binder JR, Spitzer SM, Possing ET, Medler DA. Neural substrates of phonemic perception. *Cereb Cortex N Y N 1991.* 2005 Oct; 15(10):1621–1631. <https://doi.org/10.1093/cercor/bhi040> PMID: 15703256

86. Uppenkamp S, Johnsrude IS, Norris D, Marslen-Wilson W, Patterson RD. Locating the initial stages of speech-sound processing in human temporal cortex. *NeuroImage*. 2006 Jul 1; 31(3):1284–1296. <https://doi.org/10.1016/j.neuroimage.2006.01.004> PMID: 16504540
87. Chang EF, Rieger JW, Johnson K, Berger MS, Barbaro NM, Knight RT. Categorical speech representation in human superior temporal gyrus. *Nat Neurosci*. 2010 Nov; 13(11):1428–1432. <https://doi.org/10.1038/nn.2641> PMID: 20890293
88. Peelle JE, Johnsrude IS, Davis MH. Hierarchical processing for speech in human auditory cortex and beyond. *Front Hum Neurosci*. 2010 Jun 28; 4:51. <https://doi.org/10.3389/fnhum.2010.00051> PMID: 20661456
89. Obleser J, Leaver A, VanMeter J, Rauschecker J. Segregation of vowels and consonants in human auditory cortex: evidence for distributed hierarchical organization. *Front Psychol [Internet]*. 2010 [cited 2022 Jul 5]; 1. Available from: <https://www.frontiersin.org/articles/10.3389/fpsyg.2010.00232> PMID: 21738513
90. Overath T, McDermott JH, Zarate JM, Poeppel D. The cortical analysis of speech-specific temporal structure revealed by responses to sound quilts. *Nat Neurosci*. 2015 Jun; 18(6):903–911. <https://doi.org/10.1038/nn.4021> PMID: 25984889
91. Evans S, Davis MH. Hierarchical organization of auditory and motor representations in speech perception: evidence from searchlight similarity analysis. *Cereb Cortex*. 2015 Dec 1; 25(12):4772–4788. <https://doi.org/10.1093/cercor/bhv136> PMID: 26157026
92. Norman-Haignere SV, Feather J, Boebinger D, Brunner P, Ritaccio A, McDermott JH, et al. A neural population selective for song in human auditory cortex. *Curr Biol*. 2022 Apr; 32(7):1470–1484.e12. <https://doi.org/10.1016/j.cub.2022.01.069> PMID: 35196507
93. Norman-Haignere SV, Long LK, Devinsky O, Doyle W, Irobunda I, Merricks EM, et al. Multiscale temporal integration organizes hierarchical computation in human auditory cortex. *Nat Hum Behav*. 2022 Mar; 6(3):455–469. <https://doi.org/10.1038/s41562-021-01261-y> PMID: 35145280
94. Hamilton LS, Oganian Y, Hall J, Chang EF. Parallel and distributed encoding of speech across human auditory cortex. *Cell*. 2021 Sep 2; 184(18):4626–4639.e13. <https://doi.org/10.1016/j.cell.2021.07.019> PMID: 34411517
95. Leaver AM, Rauschecker JP. Cortical Representation of Natural Complex Sounds: Effects of Acoustic Features and Auditory Object Category. *J Neurosci*. 2010 Jun 2; 30(22):7604–7612. <https://doi.org/10.1523/JNEUROSCI.0296-10.2010> PMID: 20519535
96. Angulo-Perkins A, Aubé W, Peretz I, Barrios FA, Armony JL, Concha L. Music listening engages specific cortical regions within the temporal lobes: differences between musicians and non-musicians. *Cortex J Devoted Study Nerv Syst Behav*. 2014 Oct; 59:126–137. <https://doi.org/10.1016/j.cortex.2014.07.013> PMID: 25173956
97. Warren JD, Griffiths TD. Distinct mechanisms for processing spatial sequences and pitch sequences in the human auditory brain. *J Neurosci*. 2003 Jul 2; 23(13):5799–5804. <https://doi.org/10.1523/JNEUROSCI.23-13-05799.2003> PMID: 12843284
98. Brunetti M, Belardinelli P, Caulo M, Del Gratta C, Della Penna S, Ferretti A, et al. Human brain activation during passive listening to sounds from different locations: An fMRI and MEG study. *Hum Brain Mapp*. 2005; 26(4):251–261. <https://doi.org/10.1002/hbm.20164> PMID: 15954141
99. Deouell LY, Heller AS, Malach R, D'Esposito M, Knight RT. Cerebral responses to change in spatial location of unattended sounds. *Neuron*. 2007 Sep 20; 55(6):985–996. <https://doi.org/10.1016/j.neuron.2007.08.019> PMID: 17880900
100. Derey K, Valente G, de Gelder B, Formisano E. Opponent Coding of Sound Location (Azimuth) in Planum Temporale is Robust to Sound-Level Variations. *Cereb Cortex*. 2016 Jan 1; 26(1):450–464. <https://doi.org/10.1093/cercor/bhv269> PMID: 26545618
101. McLaughlin SA, Higgins NC, Stecker GC. Tuning to Binaural Cues in Human Auditory Cortex. *J Assoc Res Otolaryngol*. 2016 Feb; 17(1):37–53. <https://doi.org/10.1007/s10162-015-0546-4> PMID: 26466943
102. Schrimpf M, Kubilius J, Hong H, Majaj NJ, Rajalingham R, Issa EB, et al. Brain-score: which artificial neural network for object recognition is most brain-like? [Internet]. *Neuroscience*; 2018 Sep [cited 2022 Feb 8]. Available from: <http://biorxiv.org/lookup/doi/10.1101/407007>
103. Rodríguez FA, Chen C, Read HL, Escabí MA. Neural Modulation Tuning Characteristics Scale to Efficiently Encode Natural Sound Statistics. *J Neurosci*. 2010 Nov 24; 30(47):15969–15980. <https://doi.org/10.1523/JNEUROSCI.0966-10.2010> PMID: 21106835
104. Dau T, Kollmeier B, Kohlrausch A. Modeling auditory processing of amplitude modulation. I. Detection and masking with narrow-band carriers. *J Acoust Soc Am*. 1997; 102(5 Pt 1):2892–2905. <https://doi.org/10.1121/1.420344> PMID: 9373976

105. McDermott JH, Simoncelli EP. Sound texture perception via statistics of the auditory periphery: evidence from sound synthesis. *Neuron*. 2011 Sep 8; 71(5):926–940. <https://doi.org/10.1016/j.neuron.2011.06.032> PMID: 21903084
106. Schrimpf M, Blank IA, Tuckute G, Kauf C, Hosseini EA, Kanwisher N, et al. The neural architecture of language: Integrative modeling converges on predictive processing. *Proc Natl Acad Sci*. 2021 Nov 9; 118(45):e2105646118. <https://doi.org/10.1073/pnas.2105646118> PMID: 34737231
107. Koumura T, Terashima H, Furukawa S. Human-Like Modulation Sensitivity Emerging through Optimization to Natural Sound Recognition. *J Neurosci*. 2023 May 24; 43(21):3876–3894. <https://doi.org/10.1523/JNEUROSCI.2002-22.2023> PMID: 37185101
108. Cox DD, Savoy RL. Functional magnetic resonance imaging (fMRI) “brain reading”: detecting and classifying distributed patterns of fmri activity in human visual cortex. *NeuroImage*. 2003 Jun; 19(2 Pt 1):261–270. [https://doi.org/10.1016/s1053-8119\(03\)00049-1](https://doi.org/10.1016/s1053-8119(03)00049-1) PMID: 12814577
109. Ivanova AA, Schrimpf M, Anzellotti S, Zaslavsky N, Fedorenko E, Isik L. Beyond linear regression: mapping models in cognitive neuroscience should align with research goals. *Neurons Behav Data Anal Theory* [Internet]. 2022 Aug 23 [cited 2022 Sep 2]. Available from: <https://arxiv.org/abs/2208.10668>
110. Ratan Murty NA, Bashivan P, Abate A, DiCarlo JJ, Kanwisher N. Computational models of category-selective brain regions enable high-throughput tests of selectivity. *Nat Commun*. 2021 Sep 20; 12(1):5540. <https://doi.org/10.1038/s41467-021-25409-6> PMID: 34545079
111. Williams AH, Kunz E, Kornblith S, Linderman SW. Generalized Shape Metrics on Neural Representations. *Advances in Neural Information Processing Systems 34 (NeurIPS 2021)*. 2021.
112. Sexton NJ, Love BC. Reassessing hierarchical correspondences between brain and deep networks through direct interface. *Sci Adv*. 2022 Jul 13; 8(28):eabm2219. <https://doi.org/10.1126/sciadv.abm2219> PMID: 35857493
113. Beguš G, Zhou A, Zhao TC. Encoding of speech in convolutional layers and the brain stem based on language experience. *Sci Rep*. 2023 Apr 20; 13(1):6480. <https://doi.org/10.1038/s41598-023-33384-9> PMID: 37081119
114. Guest O, Martin AE. On Logical Inference over Brains, Behaviour, and Artificial Neural Networks. *Comput Brain Behav*. 2023 Jun 1; 6(2):213–227.
115. Hickok G, Poeppel D. The cortical organization of speech processing. *Nat Rev Neurosci*. 2007 May; 8(5):393–402. <https://doi.org/10.1038/nrn2113> PMID: 17431404
116. Rauschecker JP, Tian B. Mechanisms and streams for processing of “what” and “where” in auditory cortex. *Proc Natl Acad Sci*. 2000 Oct 24; 97(22):11800–11806. <https://doi.org/10.1073/pnas.97.22.11800> PMID: 11050212
117. Alain C, Arnott SR, Hevenor S, Graham S, Grady CL. “What” and “where” in the human auditory system. *Proc Natl Acad Sci*. 2001 Oct 9; 98(21):12301–12306. <https://doi.org/10.1073/pnas.211209098> PMID: 11572938
118. Ahveninen J, Jääskeläinen IP, Raij T, Bonmassar G, Devore S, Hämäläinen M, et al. Task-modulated “what” and “where” pathways in human auditory cortex. *Proc Natl Acad Sci U S A*. 2006 Sep 26; 103(39):14608–14613. <https://doi.org/10.1073/pnas.0510480103> PMID: 16983092
119. Lomber SG, Malhotra S. Double dissociation of “what” and “where” processing in auditory cortex. *Nat Neurosci*. 2008 May; 11(5):609–616. <https://doi.org/10.1038/nn.2108> PMID: 18408717
120. Bizley JK, Cohen YE. The what, where and how of auditory-object perception. *Nat Rev Neurosci*. 2013 Oct; 14(10):693–707. <https://doi.org/10.1038/nrn3565> PMID: 24052177
121. Hamilton LS, Edwards E, Chang EF. A spatial map of onset and sustained responses to speech in the human superior temporal gyrus. *Curr Biol*. 2018 Jun 18; 28(12):1860–1871.e4. <https://doi.org/10.1016/j.cub.2018.04.033> PMID: 29861132
122. Forseth KJ, Hickok G, Rollo PS, Tandon N. Language prediction mechanisms in human auditory cortex. *Nat Commun*. 2020 Oct 16; 11(1):5240. <https://doi.org/10.1038/s41467-020-19010-6> PMID: 33067457
123. Conwell C, Prince JS, Kay KN, Alvarez GA, Konkle T. What can 1.8 billion regressions tell us about the pressures shaping high-level visual representation in brains and machines? [Internet]. *bioRxiv*; 2023 [cited 2023 Jul 27]. p. 2022.03.28.485868. Available from: <https://www.biorxiv.org/content/10.1101/2022.03.28.485868v2>
124. Deng J, Dong W, Socher R, Li LJ, Li K, Fei-Fei L. ImageNet: A large-scale hierarchical image database. 2009 IEEE Conference on Computer Vision and Pattern Recognition. 2009. p. 248–255.
125. Krizhevsky A. Learning Multiple Layers of Features from Tiny Images. 2009 [cited 2023 Jun 9]. Available from: <https://www.semanticscholar.org/paper/Learning-Multiple-Layers-of-Features-from-Tiny-Krizhevsky/5d90f06bb70a0a3dced62413346235c02b1aa086>

126. Lindsay GW. Convolutional neural networks as a model of the visual system: past, present, and future. *J Cogn Neurosci*. 2021 Sep 1; 33(10):2017–2031. [https://doi.org/10.1162/jocn\\_a\\_01544](https://doi.org/10.1162/jocn_a_01544) PMID: 32027584
127. Zhuang C, Yan S, Nayebi A, Schrimpf M, Frank MC, DiCarlo JJ, et al. Unsupervised neural network models of the ventral visual stream. *Proc Natl Acad Sci*. 2021 Jan 19; 118(3):e2014196118. <https://doi.org/10.1073/pnas.2014196118> PMID: 33431673
128. Chen H, Venkatesh R, Friedman Y, Wu J, Tenenbaum JB, Yamins DLK, et al. Unsupervised Segmentation in Real-World Images via Spelke Object Inference. *Computer Vision—ECCV 2022*. Cham: Springer Nature Switzerland; 2022. p. 719–735. (Lecture Notes in Computer Science).
129. Baevski A, Zhou H, Mohamed A, Auli M. Wav2vec 2.0: a framework for self-supervised learning of speech representations. *Advances in Neural Information Processing Systems 33 (NeurIPS 2020)* [Internet]. 2020 [cited 2022 Jul 7]. Available from: <http://arxiv.org/abs/2006.11477>
130. Bashivan P, Kar K, DiCarlo JJ. Neural population control via deep image synthesis. *Science*. 2019 May 3; 364(6439):eaav9436. <https://doi.org/10.1126/science.aav9436> PMID: 31048462
131. Xiao W, Kreiman G. XDream: Finding preferred stimuli for visual neurons using generative networks and gradient-free optimization. Fyshe A, editor. *PLoS Comput Biol*. 2020 Jun 15; 16(6):e1007973. <https://doi.org/10.1371/journal.pcbi.1007973> PMID: 32542056
132. Tuckute G, Sathe A, Srikant S, Taliaferro M, Wang M, Schrimpf M, et al. Driving and suppressing the human language network using large language models. *Nat Hum Behav*. Forthcoming [2024]. <https://doi.org/10.1101/2023.04.16.537080> PMID: 37090673
133. Keshishian M, Akbari H, Khalighinejad B, Herrero JL, Mehta AD, Mesgarani N. Estimating and interpreting nonlinear receptive field of sensory neural responses with deep neural network models. Serre T, Frank MJ, Englitz B, Lesica NA, editors. *eLife*. 2020 Jun 26; 9:e53445. <https://doi.org/10.7554/eLife.53445> PMID: 32589140
134. Harris CR, Millman KJ, van der Walt SJ, Gommers R, Virtanen P, Cournapeau D, et al. Array programming with NumPy. *Nature*. 2020 Sep; 585(7825):357–362. <https://doi.org/10.1038/s41586-020-2649-2> PMID: 32939066
135. Virtanen P, Gommers R, Oliphant TE, Haberland M, Reddy T, Cournapeau D, et al. SciPy 1.0: fundamental algorithms for scientific computing in Python. *Nat Methods*. 2020 Mar; 17(3):261–272. <https://doi.org/10.1038/s41592-019-0686-2> PMID: 32015543
136. Pedregosa F, Varoquaux G, Gramfort A, Michel V, Thirion B, Grisel O, et al. Scikit-learn: Machine Learning in Python. *J Mach Learn Res*. 2011; 12:2825–2830.
137. Del Giudice M. Effective dimensionality: a tutorial. *Multivar Behav Res*. 2021 Jun; 56(3):527–542. <https://doi.org/10.1080/00273171.2020.1743631> PMID: 32223436
138. Jenkinson M, Smith S. A global optimisation method for robust affine registration of brain images. *Med Image Anal*. 2001 Jun; 5(2):143–156. [https://doi.org/10.1016/s1361-8415\(01\)00036-6](https://doi.org/10.1016/s1361-8415(01)00036-6) PMID: 11516708
139. Greve DN, Fischl B. Accurate and robust brain image alignment using boundary-based registration. *NeuroImage*. 2009 Oct 15; 48(1):63–72. <https://doi.org/10.1016/j.neuroimage.2009.06.060> PMID: 19573611
140. Dale AM, Fischl B, Sereno MI. Cortical surface-based analysis. I. Segmentation and surface reconstruction. *NeuroImage*. 1999 Feb; 9(2):179–194. <https://doi.org/10.1006/nimg.1998.0395> PMID: 9931268
141. Penhune VB. Sensitive periods in human development: evidence from musical training. *Cortex J Devoted Study Nerv Syst Behav*. 2011 Oct; 47(9):1126–1137. <https://doi.org/10.1016/j.cortex.2011.05.010> PMID: 21665201
142. Gong Y, Chung YA, Glass J. AST: Audio Spectrogram Transformer. *Interspeech 2021* [Internet]. ISCA; 2021 [cited 2023 Aug 31]. p. 571–575. Available from: [https://www.isca-speech.org/archive/interspeech\\_2021/gong21b\\_interspeech.html](https://www.isca-speech.org/archive/interspeech_2021/gong21b_interspeech.html)
143. Drossos K, Adavanne S, Virtanen T. Automated audio captioning with recurrent neural networks. 2017 IEEE Workshop on Applications of Signal Processing to Audio and Acoustics (WASPAA). 2017. p. 374–378.
144. Drossos K, Lipping S, Virtanen T. Clotho: an audio captioning dataset. *ICASSP 2020–2020 IEEE International Conference on Acoustics, Speech and Signal Processing (ICASSP)*. 2020. p. 736–740.
145. Amodei D, Ananthanarayanan S, Anubhai R, Bai J, Battenberg E, Case C, et al. Deep Speech 2: end-to-end speech recognition in English and Mandarin. *Proceedings of The 33rd International Conference on Machine Learning* [Internet]. PMLR; 2016 [cited 2022 Jul 7]. p. 173–182. Available from: <https://proceedings.mlr.press/v48/amodei16.html>

146. Panayotov V, Chen G, Povey D, Khudanpur S. Librispeech: An ASR corpus based on public domain audio books. 2015 IEEE International Conference on Acoustics, Speech and Signal Processing (ICASSP). 2015. p. 5206–5210.
147. Fu SW, Yu C, Hsieh TA, Plantinga P, Ravanelli M, Lu X, et al. MetricGAN+: An Improved Version of MetricGAN for Speech Enhancement. Interspeech 2021 [Internet]. ISCA; 2021 [cited 2023 Aug 31]. p. 201–205. Available from: [https://www.isca-speech.org/archive/interspeech\\_2021/fu21\\_interspeech.html](https://www.isca-speech.org/archive/interspeech_2021/fu21_interspeech.html)
148. Veaux C, Yamagishi J, King S. The voice bank corpus: Design, collection and data analysis of a large regional accent speech database. 2013 International Conference Oriental COCOSDA held jointly with 2013 Conference on Asian Spoken Language Research and Evaluation (O-COCOSDA/CASLRE). 2013. p. 1–4.
149. Wang C, Tang Y, Ma X, Wu A, Popuri S, Okhonko D, et al. fairseq S2T: fast speech-to-text modeling with fairseq. Proceedings of the 2020 Conference of the Asian Chapter of the Association for Computational Linguistics (ACL): System Demonstrations. 2020.
150. Subakan C, Ravanelli M, Cornell S, Bronzi M, Zhong J. Attention is all you need in speech separation. 2021.
151. Maciejewski M, Wichern G, McQuinn E, Roux JL. WHAMR!: Noisy and Reverberant Single-Channel Speech Separation. ICASSP 2020–2020 IEEE International Conference on Acoustics, Speech and Signal Processing (ICASSP). 2020. p. 696–700.
152. Hershey S, Chaudhuri S, Ellis DPW, Gemmeke JF, Jansen A, Moore RC, et al. CNN architectures for large-scale audio classification. 2017 IEEE International Conference on Acoustics, Speech and Signal Processing (ICASSP) [Internet]. New Orleans, LA, USA: IEEE Press; 2017 [cited 2023 Aug 31]. p. 131–135. <https://doi.org/10.1109/ICASSP.2017.7952132>
153. van Niekerk B, Nortje L, Kamper H. Vector-quantized neural networks for acoustic unit discovery in the ZeroSpeech 2020 challenge. Proceedings of INTERSPEECH. 2020; 2020.
154. Dunbar E, Algayres R, Karadayi J, Bernard M, Benjumea J, Cao XN, et al. The Zero Resource Speech Challenge 2019: TTS Without T. Interspeech 2019 [Internet]. 2019 [cited 2023 Aug 31]. p. 1088–1092. Available from: [https://www.isca-speech.org/archive/interspeech\\_2019/dunbar19\\_interspeech.html](https://www.isca-speech.org/archive/interspeech_2019/dunbar19_interspeech.html)
155. Bertin-Mahieux T, Whitman B, Lamere P. The Million Song Dataset. Proceedings of the 12th International Society for Music Information Retrieval Conference (ISMIR 2011). 2011.
156. Howard AG, Zhu M, Chen B, Kalenichenko D, Wang W, Weyand T, et al. MobileNets: Efficient Convolutional Neural Networks for Mobile Vision Applications [Internet]. arXiv; 2017 [cited 2023 Jun 12]. Available from: <http://arxiv.org/abs/1704.04861>
157. Hannun A, Case C, Casper J, Catanzaro B, Diamos G, Elsen E, et al. Deep Speech: Scaling up end-to-end speech recognition [Internet]. arXiv; 2014 [cited 2023 Jun 12]. Available from: <http://arxiv.org/abs/1412.5567>
158. Liu AH, Chung YA, Glass J. Non-Autoregressive Predictive Coding for Learning Speech Representations from Local Dependencies. Proceedings of INTERSPEECH. 2021; 2021.
159. Touvron H, Cord M, Douze M, Massa F, Sablayrolles A, Jegou H. Training data-efficient image transformers & distillation through attention. Proceedings of the 38th International Conference on Machine Learning [Internet]. PMLR; 2021 [cited 2023 Aug 31]. p. 10347–10357. Available from: <https://proceedings.mlr.press/v139/touvron21a.html>
160. Vaswani A, Shazeer N, Parmar N, Uszkoreit J, Jones L, Gomez AN, et al. Attention Is All You Need. Advances in Neural Information Processing Systems 30 (NIPS 2017). 2017.
161. Devlin J, Chang MW, Lee K, Toutanova K. BERT: Pre-training of Deep Bidirectional Transformers for Language Understanding. Proceedings of NAACL-HLT 2019. Association for Computational Linguistics; 2019. p. 4171–4186.
162. Ravanelli M, Parcollet T, Plantinga P, Rouhe A, Cornell S, Lugosch L, et al. SpeechBrain: a general-purpose speech toolkit [Internet]. arXiv; 2021 [cited 2022 Jul 7]. Available from: <http://arxiv.org/abs/2106.04624>
163. Wolf T, Debut L, Sanh V, Chaumond J, Delangue C, Moi A, et al. Transformers: state-of-the-art natural language processing. Proceedings of the 2020 Conference on Empirical Methods in Natural Language Processing: System Demonstrations [Internet]. Online: Association for Computational Linguistics; 2020 [cited 2022 Jul 7]. p. 38–45. Available from: <https://aclanthology.org/2020.emnlp-demos.6>
164. Kudo T, Richardson J. SentencePiece: A simple and language independent subword tokenizer and detokenizer for Neural Text Processing. Proceedings of the 2018 Conference on Empirical Methods in Natural Language Processing (System Demonstrations). 2018.
165. Simonyan K, Zisserman A. Very deep convolutional networks for large-scale image recognition. Proceedings of ICLR. 2015; 2015.

166. Dunbar E, Karadayi J, Bernard M, Cao XN, Algayres R, Ondel L, et al. The Zero Resource Speech Challenge 2020: Discovering discrete subword and word units. Proceedings of INTERSPEECH 2020 [Internet]. 2020 [cited 2022 Jul 7]. Available from: <https://hal.science/hal-02962224>
167. Graves A, Fernández S, Gomez F. Connectionist temporal classification: Labelling unsegmented sequence data with recurrent neural networks. Proceedings of the International Conference on Machine Learning, ICML 2006. 2006. p. 369–376.
168. Glasberg BR, Moore BCJ. Derivation of auditory filter shapes from notched-noise data. *Hear Res*. 1990 Aug 1; 47(1):103–138. [https://doi.org/10.1016/0378-5955\(90\)90170-t](https://doi.org/10.1016/0378-5955(90)90170-t) PMID: 2228789
169. Paul DB, Baker JM. The design for the Wall Street Journal-based CSR corpus. *Speech and Natural Language: Proceedings of a Workshop Held at Harriman, New York, February 23–26, 1992* [Internet]. 1992 [cited 2022 Jul 7]. Available from: <https://aclanthology.org/H92-1073>
170. Köhn A, Stegen F, Baumann T. Mining the spoken wikipedia for speech data and beyond. Proceedings of the Tenth International Conference on Language Resources and Evaluation (LREC'16) [Internet]. Portorož, Slovenia: European Language Resources Association (ELRA); 2016 [cited 2022 Jul 7]. p. 4644–4647. Available from: <https://aclanthology.org/L16-1735>
171. Zue VW, Seneff S. Transcription and Alignment of the TIMIT Database. In: Fujisaki H, editor. *Recent Research Towards Advanced Man-Machine Interface Through Spoken Language* [Internet]. Amsterdam: Elsevier Science B.V.; 1996 [cited 2023 Nov 15]. p. 515–525. Available from: <https://www.sciencedirect.com/science/article/pii/B9780444816078500888>
172. Piczak KJ. ESC: dataset for environmental sound classification. Proceedings of the 23rd ACM international conference on Multimedia [Internet]. New York, NY, USA: Association for Computing Machinery; 2015 [cited 2022 Jul 11]. p. 1015–1018. (MM '15). <https://doi.org/10.1145/2733373.2806390>
