# Supplementary material for: Many but not all deep neural network audio models capture brain responses and exhibit correspondence between model stages and brain regions
Source: PubMed Central journal article supplement (PMC10718467; doi:10.1371/journal.pbio.3002366), 2023-12-13

# A NH2015 fMRI RDMs

All Auditory Voxels

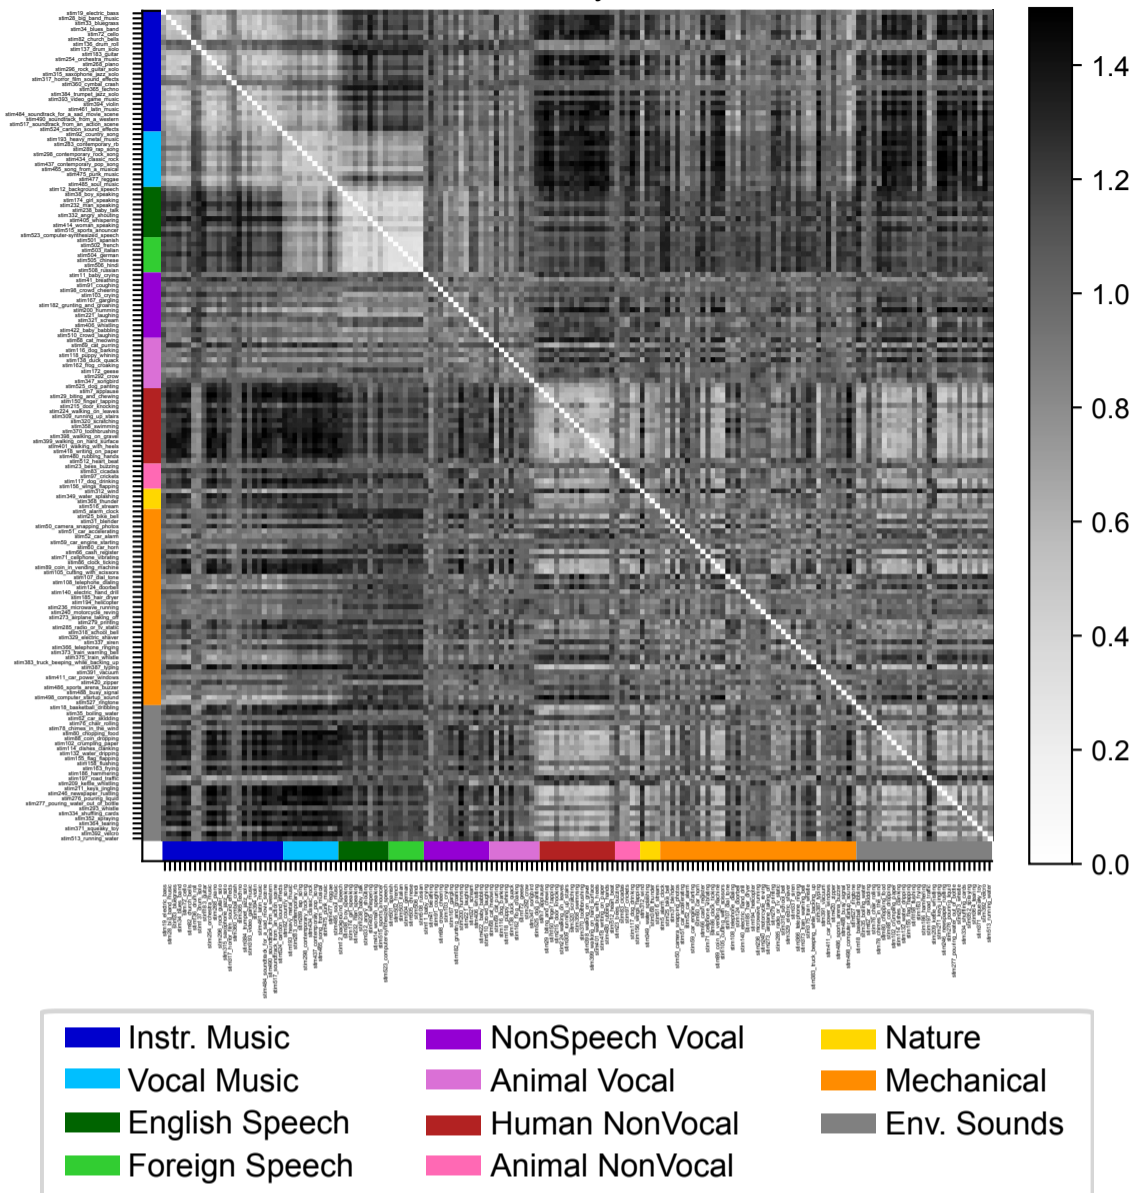

ROI=Primary

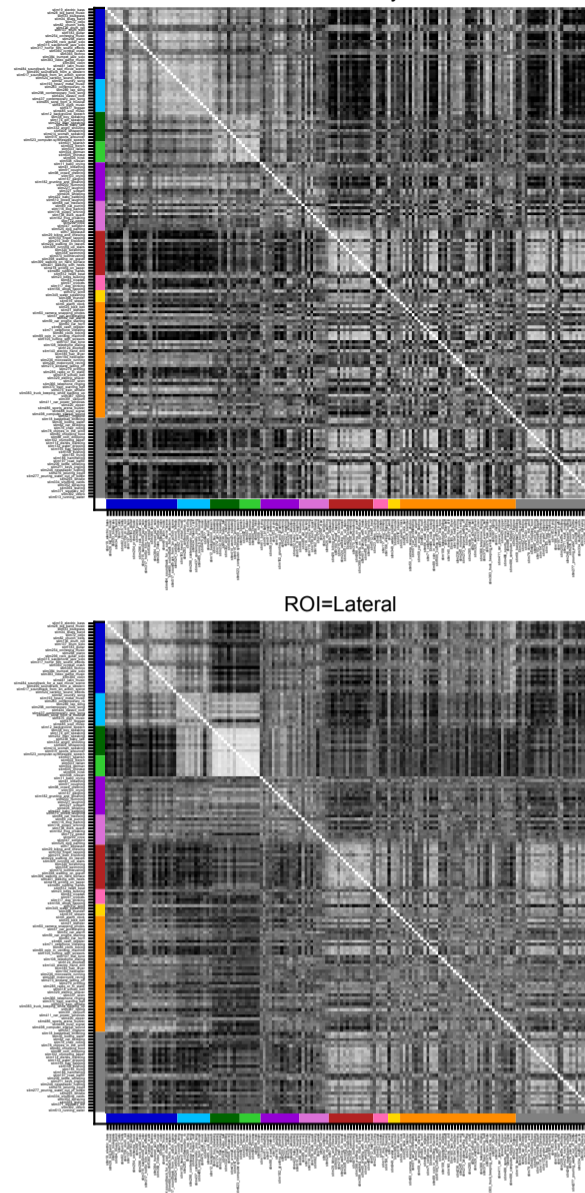

ROI=Posterior

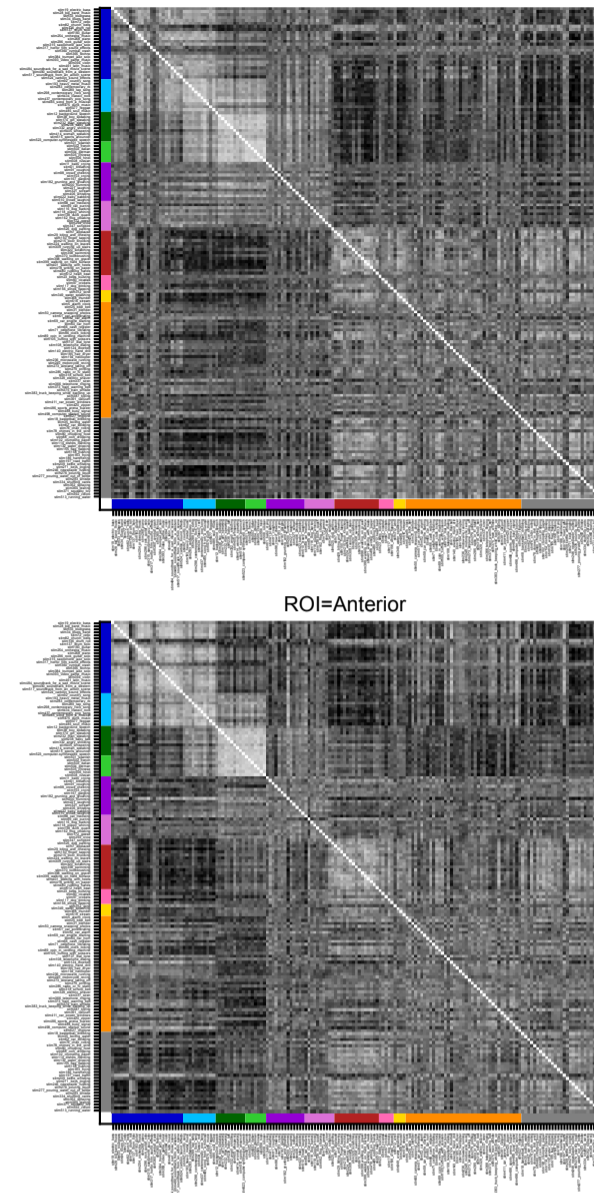

ROI=Lateral

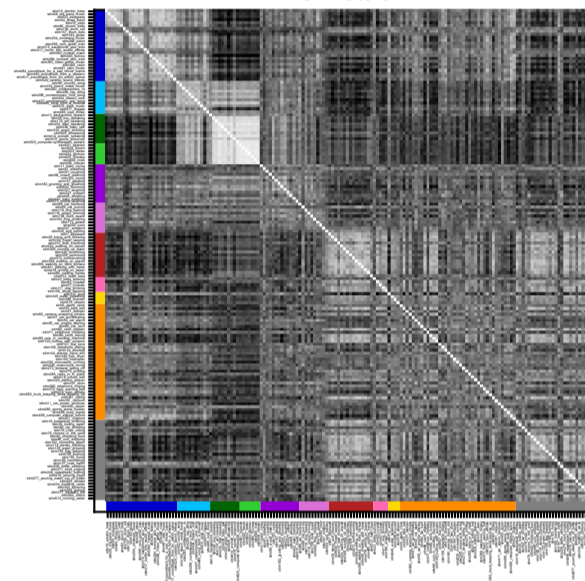

ROI=Anterior

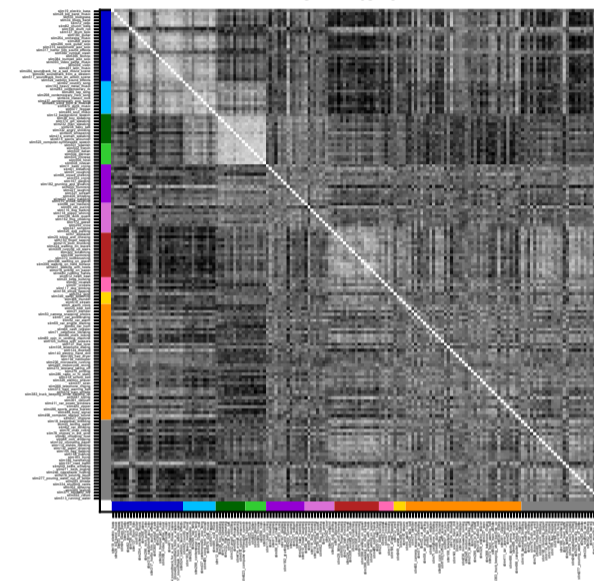

# B B2021 fMRI RDMs

All Auditory Voxels

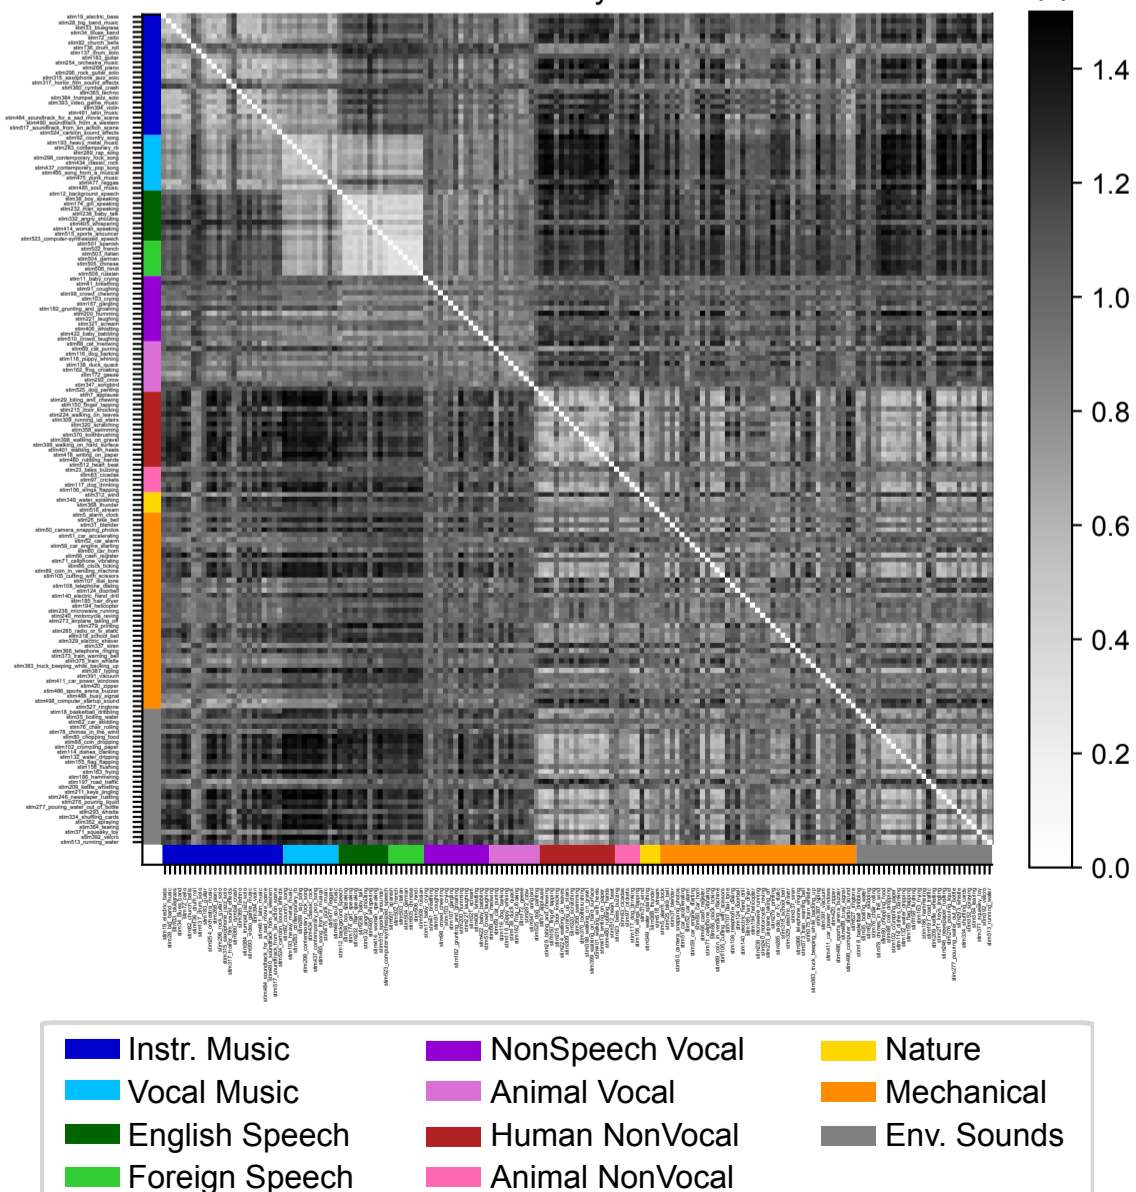

ROI=Primary

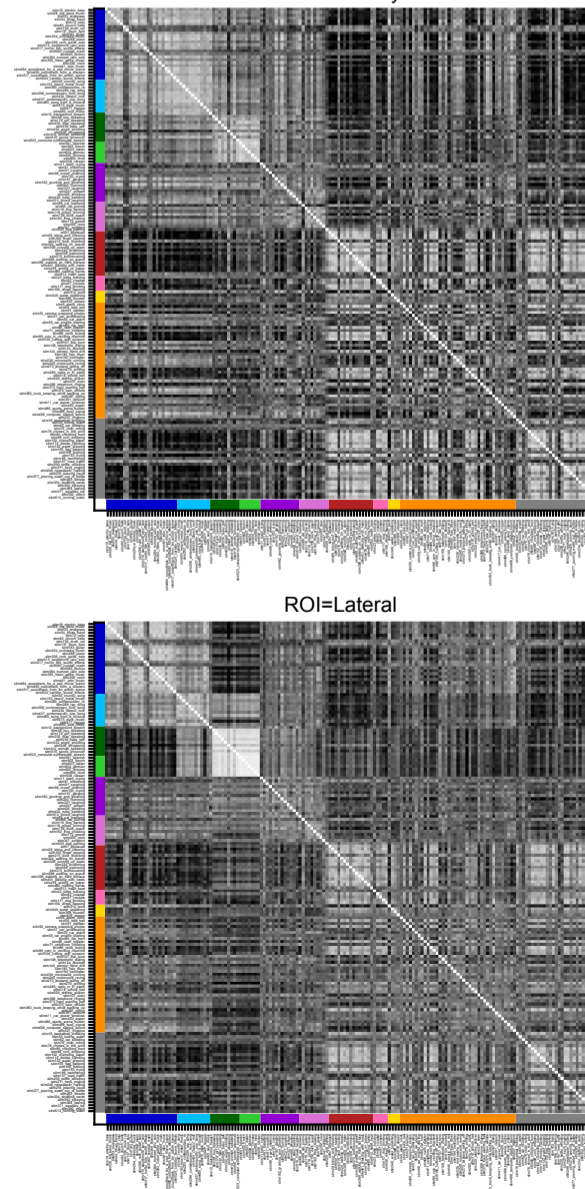

ROI=Posterior

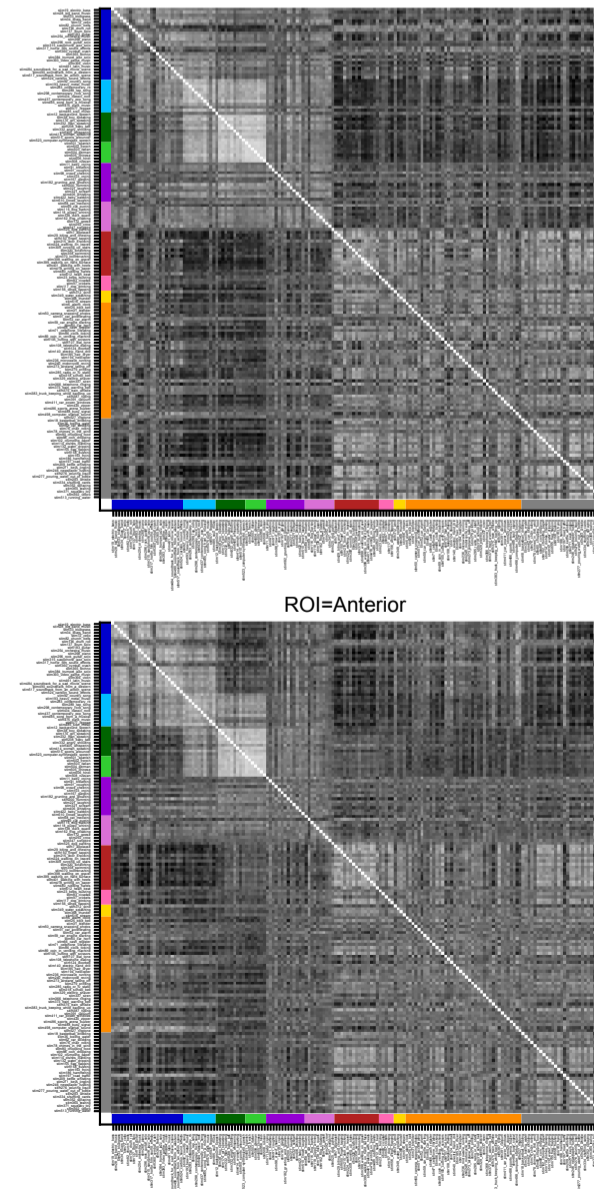

ROI=Lateral

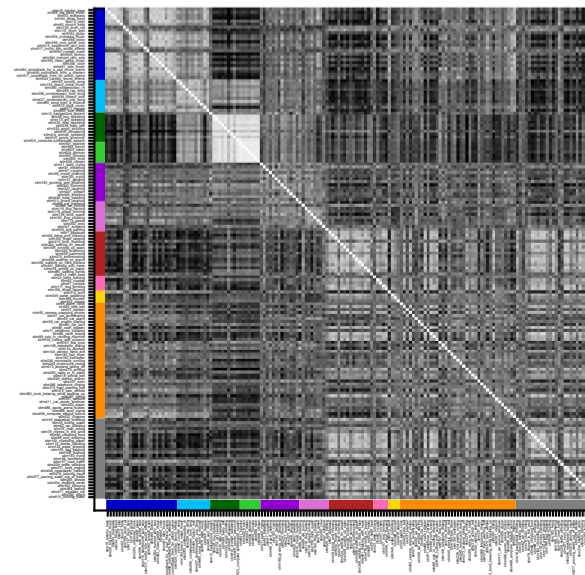

ROI=Anterior

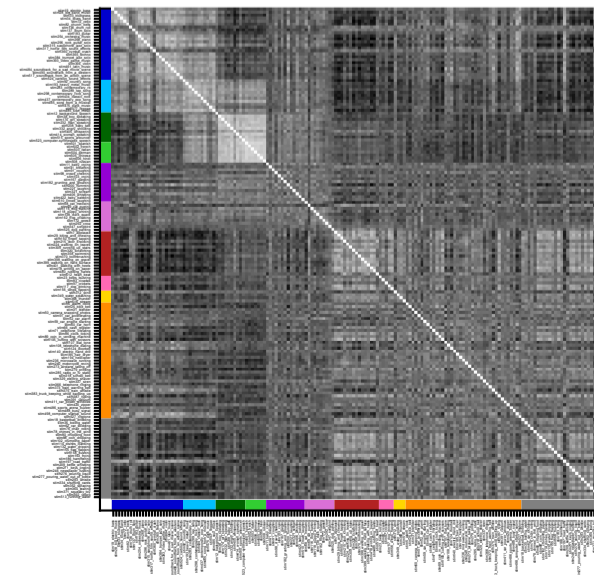

Supplement: pbio.3002366.s001.pdf [file pbio.3002366.s001.pdf]
